# Supplementary material for: Palladium-catalyzed direct mono-aroylation of O-arylmethyl and aryl-substituted acetoxime ethers
Source: Royal Society of Chemistry journal article supplement (doi:10.1039/c8ob01400k), 2018-01-01
Supplement: c8ob01400k1.pdf [file c8ob01400k1.pdf]

## Supporting Information

### Palladium-Catalyzed Direct *mono*-Aroylation of *O*-Arylmethyl and Aryl Substituted Acetoxime Ethers

Ling-Yan Shao,<sup>a</sup> Zhi Xu,<sup>a</sup> Cun-Ying Wang,<sup>\*b</sup> Xiao-Pan Fu,<sup>a</sup> Miao-Miao Chen,<sup>a</sup> Hong-Wei Liu<sup>a</sup> and Ya-Fei Ji<sup>\*a</sup>

<sup>a</sup> School of Pharmacy, East China University of Science & Technology, 130 Meilong Road, Shanghai 200237, P. R. China. Email: jyf@ecust.edu.cn.

<sup>b</sup> School of Chemical Engineering & Technology, Xuzhou College of Industrial Technology, Xuzhou, 221006, P. R. China. Email: xzcitwcy@126.com.

#### Table of Contents

|                                                                  |    |
|------------------------------------------------------------------|----|
| 1. Kinetic isotope effect study ( <b>Scheme 4</b> ) .....        | 2  |
| 2. Inhibition reaction of free radical.....                      | 2  |
| 3. Crystallographic data for <b>6h</b> .....                     | 3  |
| 4. All Copies of Spectra.....                                    | 4  |
| 4.1 Copies of the spectra for <b>Tables 2</b> .....              | 4  |
| 4.2 Copies of the spectra for <b>Tables 3</b> .....              | 31 |
| 4.3 Copies of the spectra for <b>Tables 4</b> .....              | 52 |
| 4.4 Copies of the spectra for <b>Scheme 2</b> .....              | 70 |
| 4.5 Copies of the spectra for <b>Scheme 3</b> .....              | 73 |
| 4.6 Copies of the spectra for <b>Scheme 4</b> .....              | 74 |
| 4.7 Copies of the spectra for TEMPO ester adduct <b>10</b> ..... | 75 |

## 1. Kinetic isotope effect study (Scheme 4)

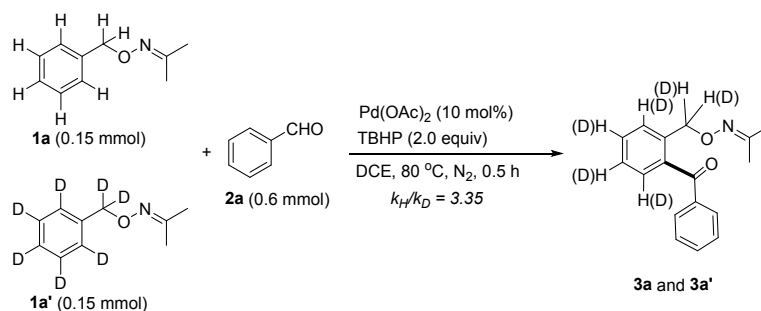

**Procedure:** A mixture of substrate **1a** (24.5 mg, 0.15 mmol), **1a'** (25.5 mg, 0.15 mmol), **2a** (63.7 mg, 0.6 mmol), Pd(OAc)<sub>2</sub> (6.7 mg, 10 mol %), TBHP (54.1 mg, 2.0 equiv) in DCE (2.5 mL) was charged in a glass sealed-tube and stirred under N<sub>2</sub> atmosphere at 80 °C for 0.5 h. Upon completion of the reaction, saturated brine (15 mL) and DCM (15 mL) were added to the mixture, then the aqueous layer was extracted with DCM (15 mL × 2). The combined organic layer was dried over anhydrous MgSO<sub>4</sub>. Finally, the solution was concentrated *in vacuo* to provide a crude product, which was further purified *via* a column chromatography on silica gel (eluent: petroleum ether/ethyl acetate = 40:1) to supply the product **3a** and **3a'** in 19.0 mg (about 23% yield). The product distribution ( $k_H/k_D = 3.35$ ) was analyzed by <sup>1</sup>H NMR, see: section 4.6 (Copies of the spectra for **Scheme 4**).

## 2. Inhibition reaction of free radical

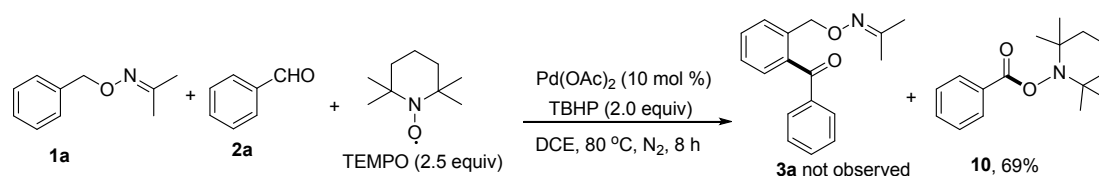

**Procedure:** A mixture of substrate **1a** (49.0 mg, 0.3 mmol), **2a** (63.7 mg, 0.6 mmol), Pd(OAc)<sub>2</sub> (6.7 mg, 10 mol %), TBHP (54.1 mg, 2.0 equiv) and TEMPO (117.2 mg, 2.5 equiv) in DCE (2.5 mL) was charged in a glass sealed-tube and stirred under N<sub>2</sub> atmosphere at 80 °C for 8 h. Upon completion of the reaction, saturated brine (15 mL) and DCM (15 mL) were added to the mixture, then the aqueous layer was extracted with DCM (15 mL × 2). The combined organic layer was dried over anhydrous MgSO<sub>4</sub>. Finally, the solution was concentrated *in vacuo* to provide a crude product, which was further purified *via* a column chromatography on silica gel (eluent: petroleum ether/ethyl acetate = 40:1) to supply the TEMPO ester adduct **10** in 69% yield.

**2,2,6,6-Tetramethylpiperidin-1-yl benzoate (10):** yellow oil, 108.2 mg (69% yield); <sup>1</sup>H NMR (400 MHz, CDCl<sub>3</sub>, ppm): δ 8.09 (d,  $J = 7.2$  Hz, 2H), 7.59 (t,  $J = 7.2$  Hz, 1H), 7.48 (t,  $J = 7.6$  Hz, 2H), 1.84–1.75 (m, 2H), 1.73–1.61 (m, 2H), 1.59–1.41 (m, 2H), 1.29 (s, 6H), 1.34 (s, 6H); <sup>13</sup>C NMR (100 MHz, CDCl<sub>3</sub>, ppm): δ 166.5, 133.1, 129.9, 129.7 (2C), 128.7 (2C), 60.5 (2C), 39.2 (2C), 32.2 (2C), 21.0 (2C), 17.2; HRMS (EI):  $m/z$  [M]<sup>+</sup> calcd. for C<sub>16</sub>H<sub>23</sub>NO<sub>2</sub>: 261.1729; found: 261.1730.

### 3. Crystallographic data for 6h

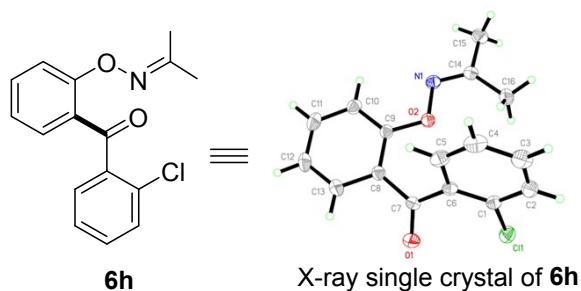

|                                          |                                                   |                                                   |
|------------------------------------------|---------------------------------------------------|---------------------------------------------------|
| Bond precision:                          | C-C = 0.0059 Å                                    |                                                   |
| Wavelength:                              | 1.54178 Å                                         |                                                   |
| Unit cell dimensions:                    | a = 10.1392(4) Å                                  | α = 90°                                           |
|                                          | b = 10.1392(4) Å                                  | β = 90°                                           |
|                                          | c = 28.1205(16) Å                                 | γ = 90°                                           |
| Temperature:                             | 296 K                                             |                                                   |
|                                          | Calculated                                        | Reported                                          |
| Volume:                                  | 2890.9(3) Å <sup>3</sup>                          | 2890.9(3) Å <sup>3</sup>                          |
| Space group:                             | P 41                                              | P 41                                              |
| Hall group                               | P 4w                                              | P 4w                                              |
| Moiety formula                           | C <sub>16</sub> H <sub>14</sub> ClNO <sub>2</sub> | C <sub>16</sub> H <sub>14</sub> ClNO <sub>2</sub> |
| Sum formula                              | C <sub>16</sub> H <sub>14</sub> ClNO <sub>2</sub> | C <sub>16</sub> H <sub>14</sub> ClNO <sub>2</sub> |
| Mr                                       | 287.73                                            | 287.73                                            |
| D <sub>x</sub> ,g cm <sup>-3</sup>       | 1.322                                             | 1.322                                             |
| z                                        | 8                                                 | 8                                                 |
| Mu (mm <sup>-1</sup> )                   | 2.344                                             | 2.344                                             |
| F000                                     | 1200.0                                            | 1200.0                                            |
| F000'                                    | 1206.13                                           |                                                   |
| h,k,lmax                                 | 12,12,33                                          | 12,12,33                                          |
| Nref                                     | 5318[ 2719]                                       | 5263                                              |
| Tmin,Tmax                                | 0.627,0.656                                       | 0.512,0.753                                       |
| Tmin'                                    | 0.569                                             |                                                   |
| Correction method = # Reported T Limits: | Tmin=0.512 Tmax=0.753                             |                                                   |
| AbsCorr = ?                              |                                                   |                                                   |
| Data completeness= 1.94/0.99             | Theta(max)= 68.464                                |                                                   |
| R(reflections)= 0.0390( 4470)            | wR2(reflections)= 0.1010( 5263)                   |                                                   |
| S = 1.021                                | Npar= 365                                         |                                                   |

## 4. All Copies of Spectra

### 4.1 Copies of the spectra for Tables 2

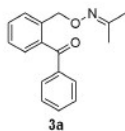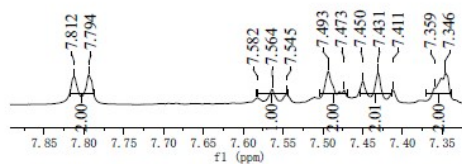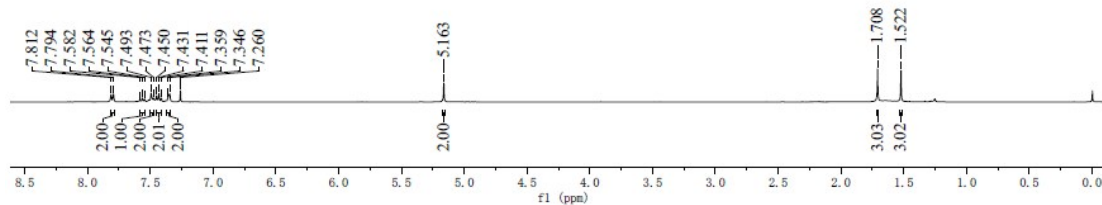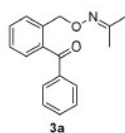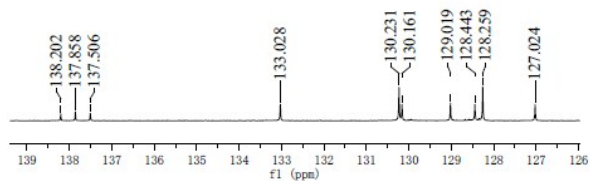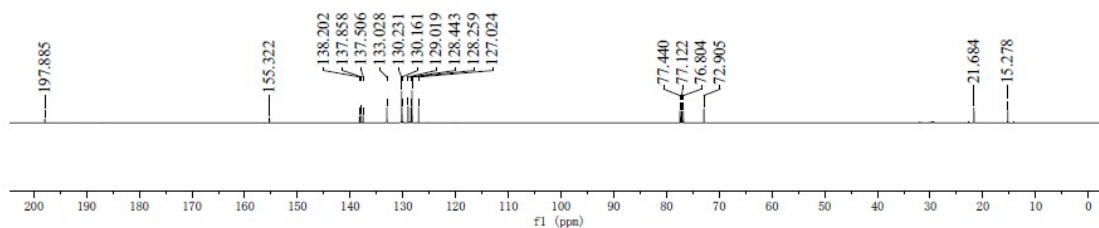



### Single Mass Analysis

Tolerance = 50.0 PPM / DBE: min = -1.5, max = 100.0

Element prediction: Off

Number of isotopic peaks used for i-FIT = 3

Monoisotopic Mass, Even Electron Ions

60 formula(e) evaluated with 6 results within limits (up to 1 closest results for each mass)

Elements Used:

C: 0-20 H: 0-20 N: 0-3 O: 0-4 Na: 0-1

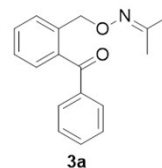

YF-JI

ECUST institute of Fine Chem

24-Jun-2016

JYF-S-416 11 (0.422) Cm (11:12)

20:55:43

1: TOF MS ES+

3.25e+003

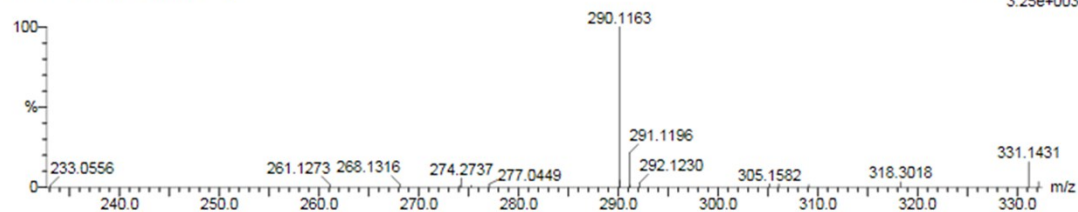

Minimum: -1.5  
Maximum: 300.0 50.0 100.0

| Mass     | Calc. Mass | mDa | PPM | DBE | i-FIT | i-FIT (Norm) | Formula         |
|----------|------------|-----|-----|-----|-------|--------------|-----------------|
| 290.1163 | 290.1157   | 0.6 | 2.1 | 9.5 | 23.0  | 0.0          | C17 H17 N O2 Na |

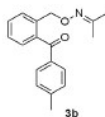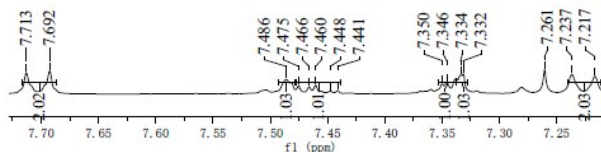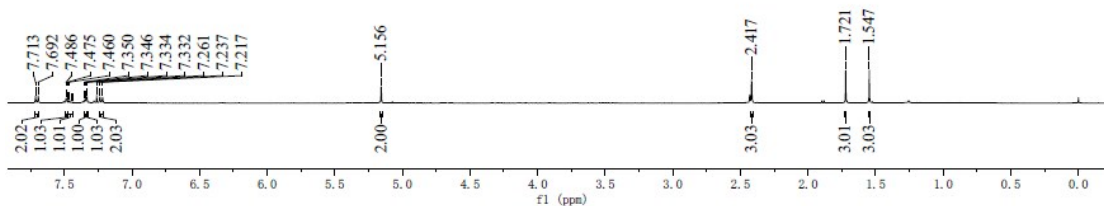

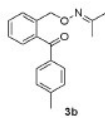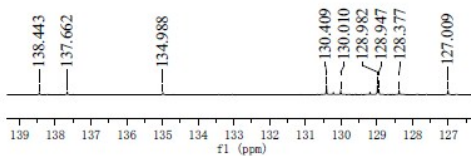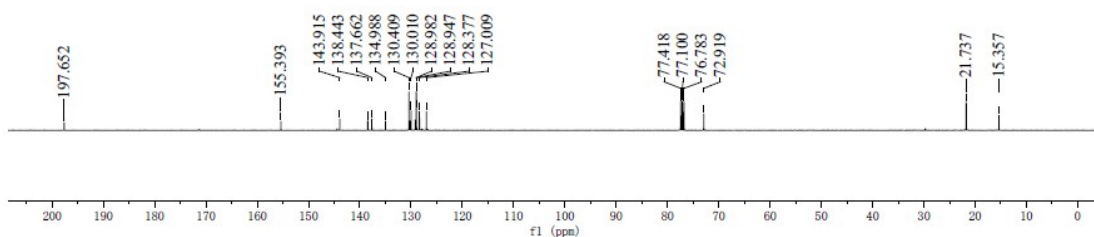

### Single Mass Analysis

Tolerance = 50.0 PPM / DBE: min = -1.5, max = 100.0

Element prediction: Off

Number of isotope peaks used for i-FIT = 3

Monoisotopic Mass, Even Electron Ions

9 formula(e) evaluated with 1 results within limits (up to 1 best isotopic matches for each mass)

Elements Used:

C: 0-18 H: 0-20 N: 0-1 O: 0-2 Na: 0-1

YF-JI

ECUST Institute of Fine Chem

06-Mar-2017

21:59:07

1: TOF MS ES+

2.02e+003

JYF-S-611 35 (0.521) Cm (33.35)

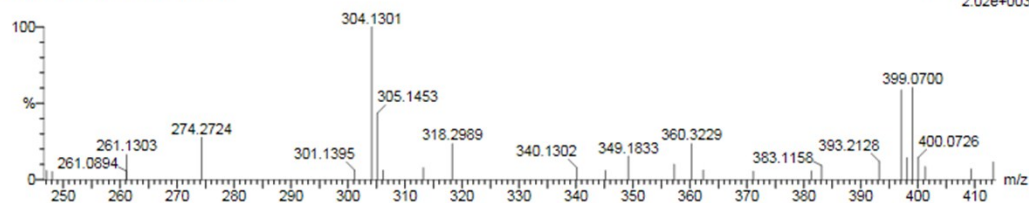

Minimum: 30.0 50.0 -1.5  
Maximum: 30.0 50.0 100.0

| Mass     | Calc. Mass | mDa  | PPM  | DBE | i-FIT | i-FIT (Norm) | Formula         |
|----------|------------|------|------|-----|-------|--------------|-----------------|
| 304.1301 | 304.1313   | -1.2 | -3.9 | 9.5 | 23.6  | 0.0          | C18 H19 N O2 Na |

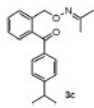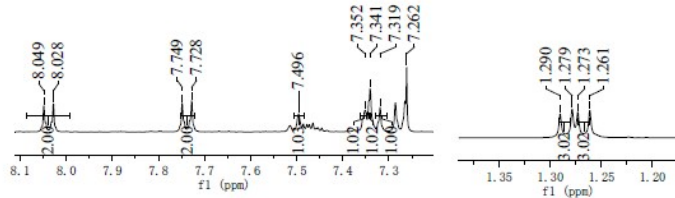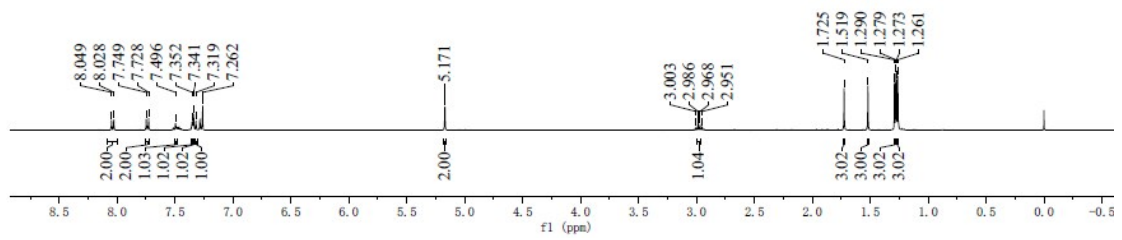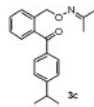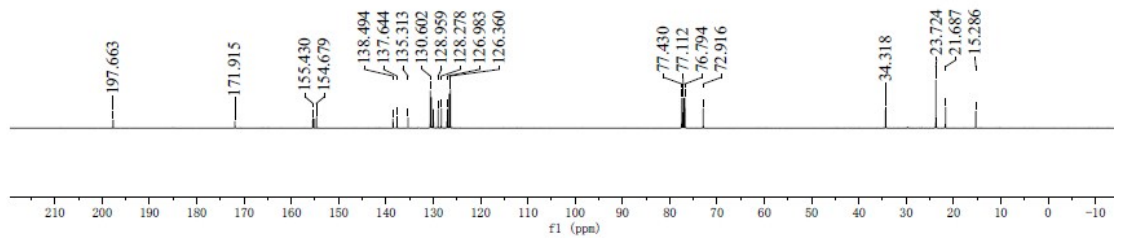

Elemental Composition Report

Multiple Mass Analysis: 41 mass(es) processed

Tolerance = 5.0 mDa / DBE: min = -1.5, max = 100.0

Element prediction: Off

Monoisotopic Mass, Odd and Even Electron Ions

505 formula(e) evaluated with 39 results within limits (up to 50 closest results for each mass)

Elements Used:

C: 0-20 H: 0-23 N: 0-1 O: 0-2

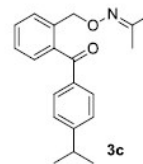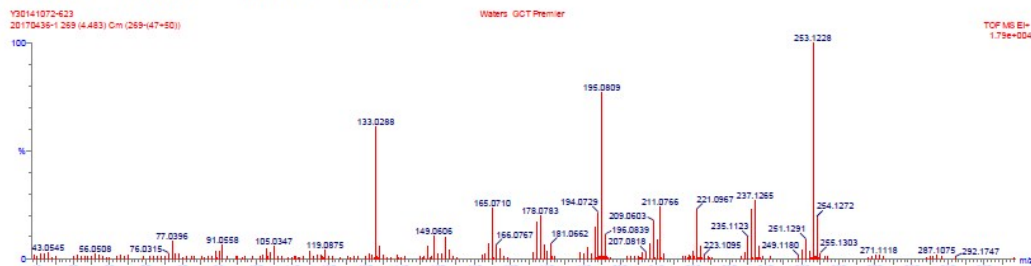

|          |        |            |      |      |      |       |           |       |
|----------|--------|------------|------|------|------|-------|-----------|-------|
| Minimum: | 3.00   |            |      |      |      |       |           | -1.5  |
| Maximum: | 100.00 |            |      | 5.0  | 10.0 |       |           | 100.0 |
| Mass     | RA     | Calc. Mass | mDa  | PPM  | DBE  | i-FIT | Formula   |       |
| 253.1228 | 100.00 | 253.1229   | -0.1 | -0.4 | 9.5  | 1.5   | C17H17 O2 |       |

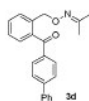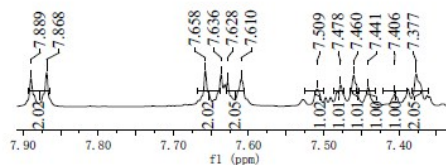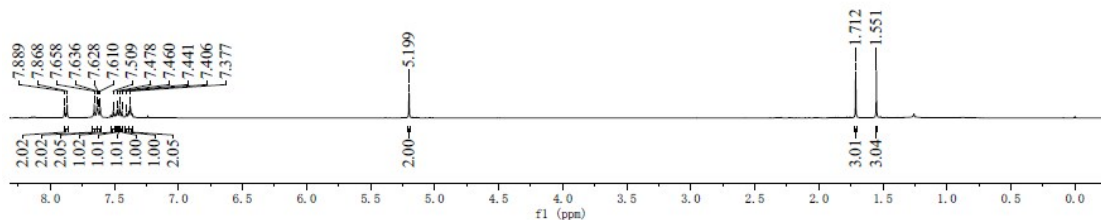

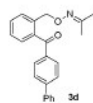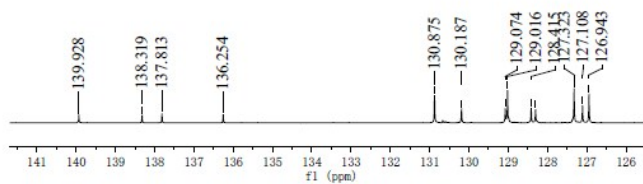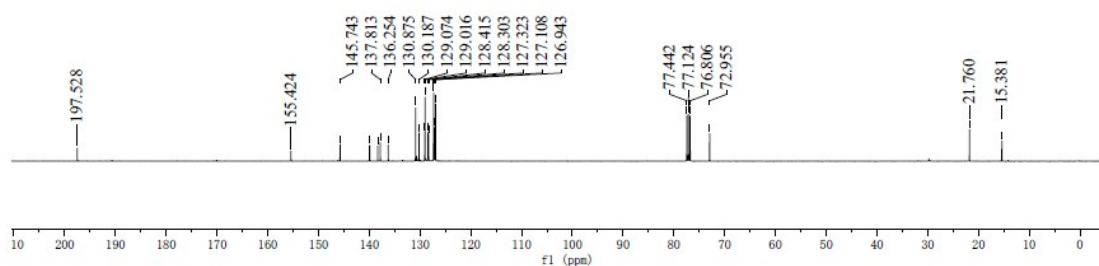

### Elemental Composition Report

Multiple Mass Analysis: 42 mass(es) processed

Tolerance = 5.0 mDa / DBE: min = -1.5, max = 100.0

Element prediction: Off

Monoisotopic Mass, Odd and Even Electron Ions

480 formula(e) evaluated with 41 results within limits (up to 50 closest results for each mass)

Elements Used:

C: 0-23 H: 0-21 N: 0-1 O: 0-2

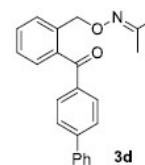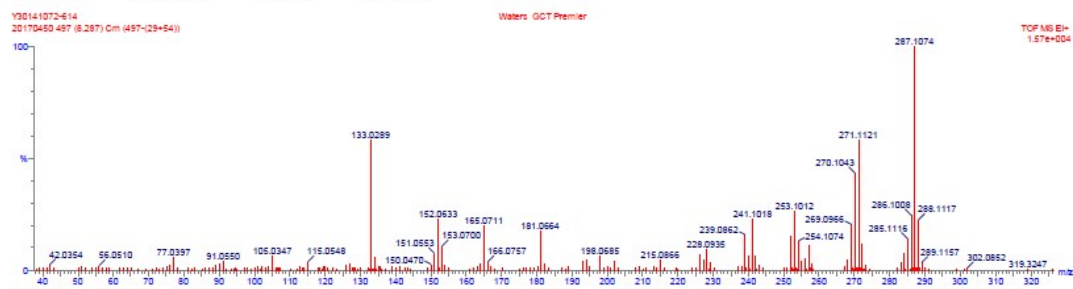

| Mass     | RA     | Calc. Mass | mDa | PPM | DBE  | i-FIT | Formula                                        |
|----------|--------|------------|-----|-----|------|-------|------------------------------------------------|
| 287.1074 | 100.00 | 287.1072   | 0.2 | 0.7 | 13.5 | 3.3   | C <sub>20</sub> H <sub>15</sub> O <sub>2</sub> |

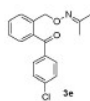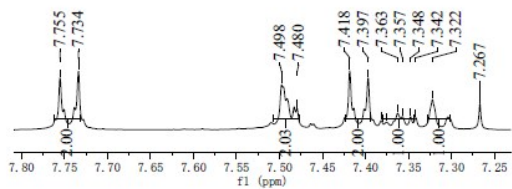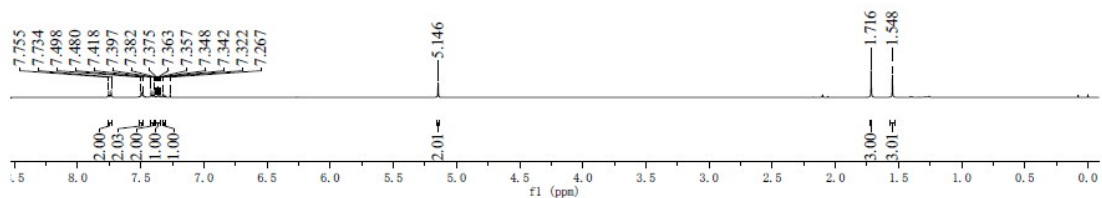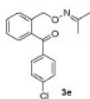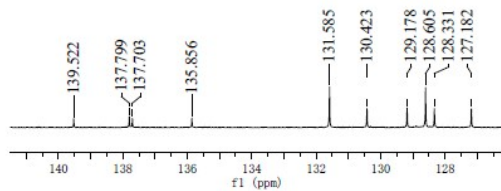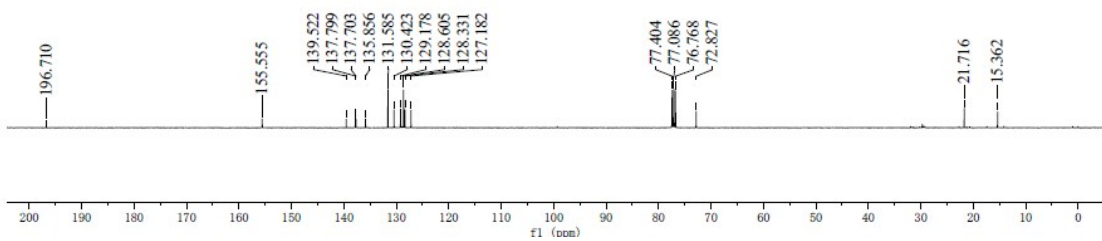

### Single Mass Analysis

Tolerance = 50.0 PPM / DBE: min = -1.5, max = 100.0

Element prediction: Off

Number of isotope peaks used for i-FIT = 3

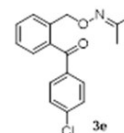

Monoisotopic Mass, Even Electron Ions

76 formula(e) evaluated with 4 results within limits (up to 1 best isotopic matches for each mass)

Elements Used:

C: 0-17 H: 0-40 N: 0-1 O: 0-5 Na: 0-1 Cl: 0-1

YF-JI

ECUST institute of Fine Chem

05-Jan-2017

22:11:02

1: TOF MS ES+

2.31e+003

YF-S-518 8 (0.191) Cm (6:8)

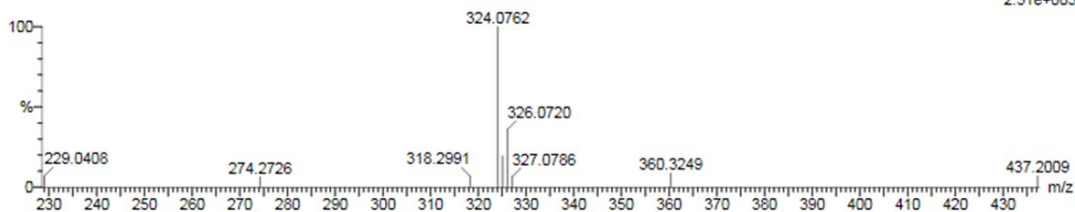

Minimum:

Maximum: 30.0 50.0 -1.5

| Mass     | Calc. Mass | mDa  | PPM  | DBE | i-FIT | i-FIT (Norm) | Formula            |
|----------|------------|------|------|-----|-------|--------------|--------------------|
| 324.0762 | 324.0767   | -0.5 | -1.5 | 9.5 | 7.3   | 0.0          | C17 H16 N O2 Na Cl |

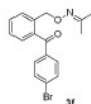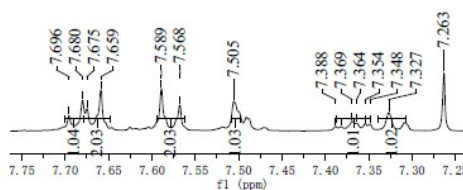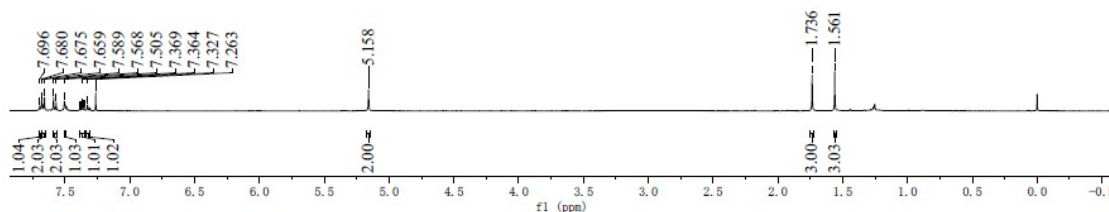



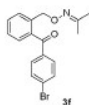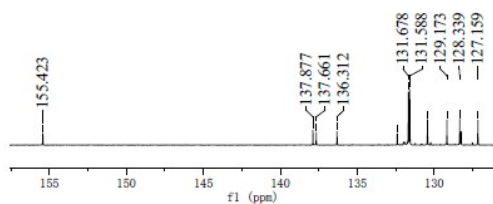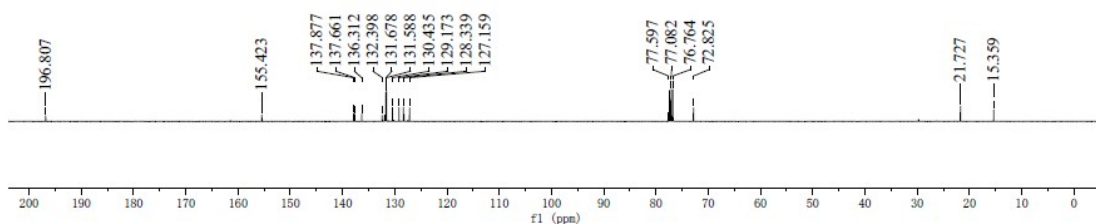

### Single Mass Analysis

Tolerance = 50.0 PPM / DBE: min = -1.5, max = 100.0

Element prediction: Off

Number of isotope peaks used for i-FIT = 3

Monoisotopic Mass, Even Electron Ions

24 formula(e) evaluated with 2 results within limits (up to 1 best isotopic matches for each mass)

Elements Used:

C: 0-20 H: 0-20 N: 0-1 O: 0-2 Na: 0-1 Br: 0-1

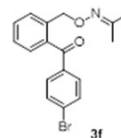

YF-JI

ECUST institute of Fine Chem

06-Mar-2017

JYF-S-606 56 (0.786) Cm (56:58)

21:46:00

1: TOF MS ES+

1.41e+003

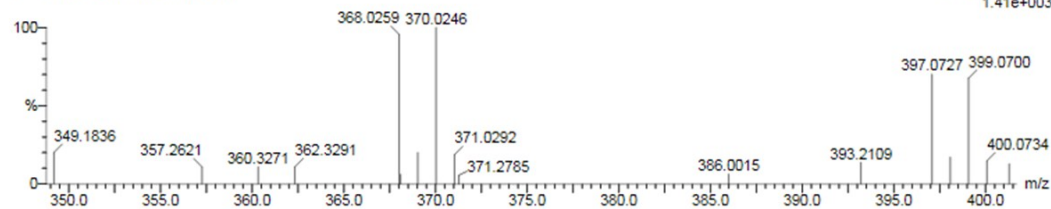

Minimum:

Maximum: 30.0 50.0 -1.5 100.0

| Mass     | Calc. Mass | mDa  | PPM  | DBE | i-FIT | i-FIT (Norm) | Formula            |
|----------|------------|------|------|-----|-------|--------------|--------------------|
| 368.0259 | 368.0262   | -0.3 | -0.8 | 9.5 | 14.7  | 0.0          | C17 H16 N O2 Na Br |



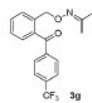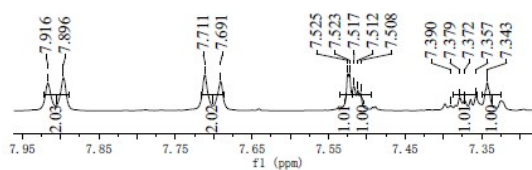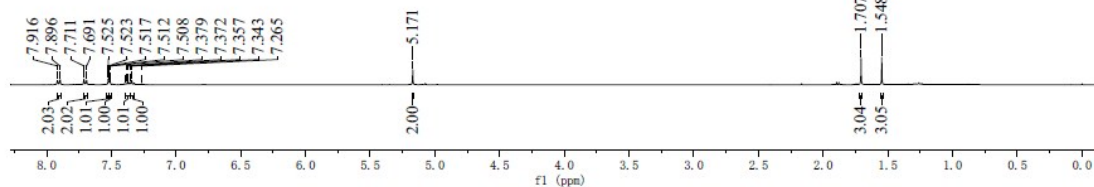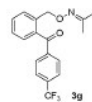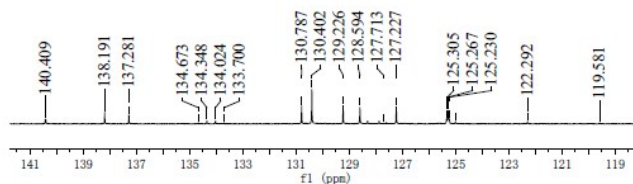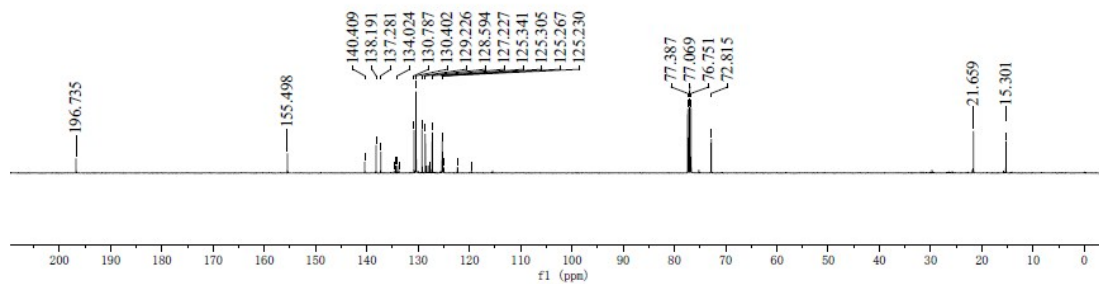

Elemental Composition Report

Multiple Mass Analysis: 31 mass(es) processed

Tolerance = 5.0 mDa / DBE: min = -1.5, max = 100.0

Element prediction: Off

Monoisotopic Mass, Odd and Even Electron Ions

987 formula(e) evaluated with 76 results within limits (up to 50 closest results for each mass)

Elements Used:

C: 0-18 H: 0-16 N: 0-1 O: 0-2 F: 0-3

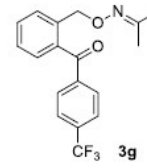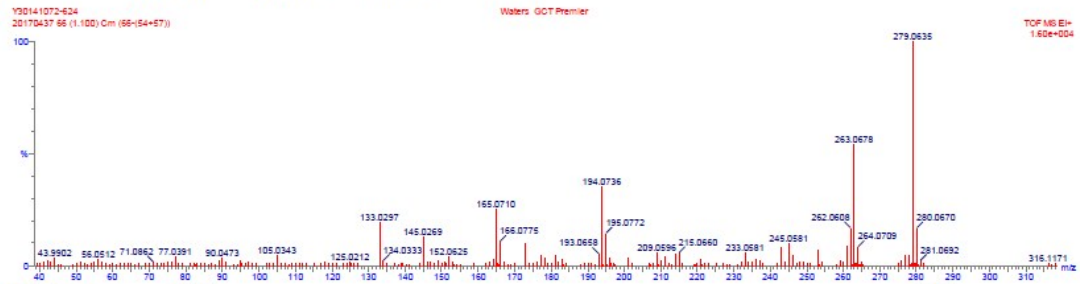

Minimum: 3.00

-1.5

Maximum: 100.00

5.0

10.0

100.0

| Mass     | RA     | Calc. Mass | mDa | PPM | DBE | i-FIT | Formula       |
|----------|--------|------------|-----|-----|-----|-------|---------------|
| 279.0635 | 100.00 | 279.0633   | 0.2 | 0.7 | 9.5 | 1.3   | C15 H10 O2 F3 |

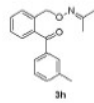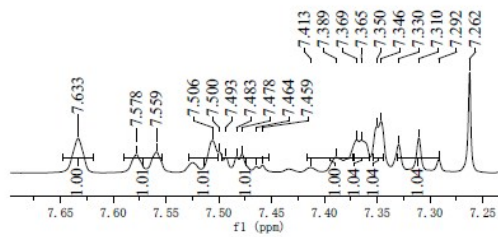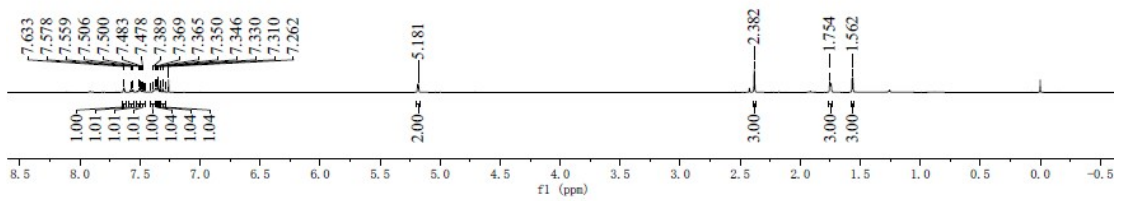

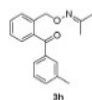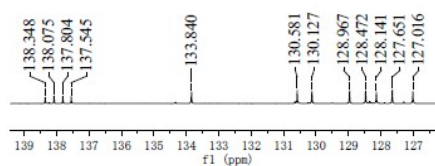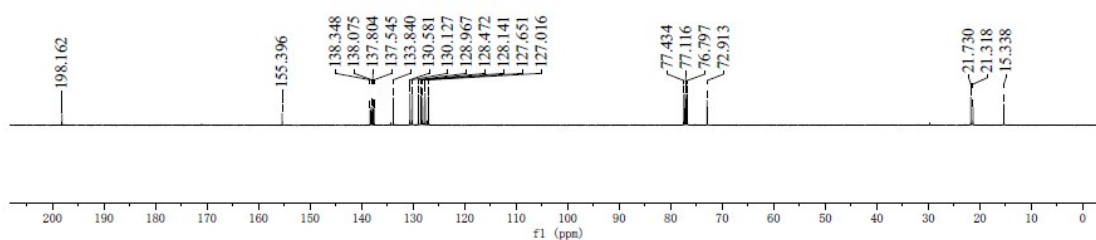

### Single Mass Analysis

Tolerance = 50.0 PPM / DBE: min = -1.5, max = 100.0

Element prediction: Off

Number of isotope peaks used for i-FIT = 3

Monoisotopic Mass, Even Electron Ions

9 formula(e) evaluated with 1 results within limits (up to 1 best isotopic matches for each mass)

Elements Used:

C: 0-18 H: 0-20 N: 0-1 O: 0-2 Na: 0-1

YF-JI

ECUST institute of Fine Chem

06-Mar-2017

21:55:25

1: TOF MS ES+

3.01e+003

JYF-S-610 34 (0.509) Cm (28:35)

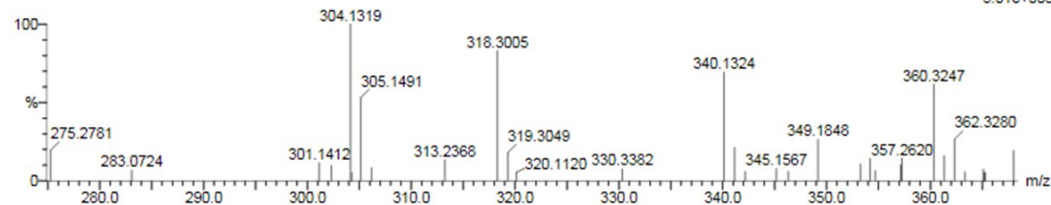

Minimum:

Maximum:

| Mass     | Calc. Mass | mDa | PPM | DBE | i-FIT | i-FIT (Norm) | Formula         |
|----------|------------|-----|-----|-----|-------|--------------|-----------------|
| 304.1319 | 304.1313   | 0.6 | 2.0 | 9.5 | 37.2  | 0.0          | C18 H19 N O2 Na |

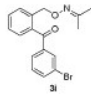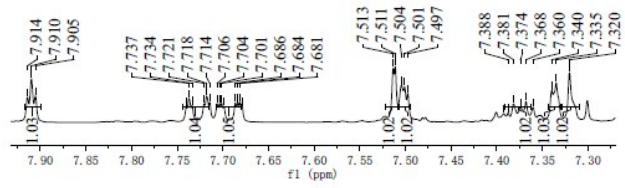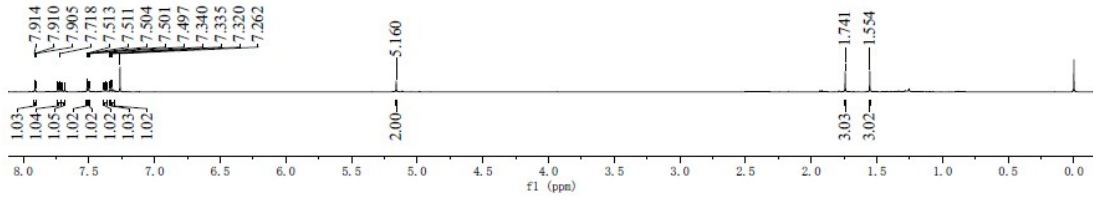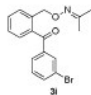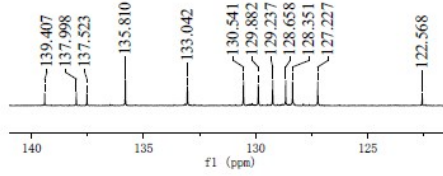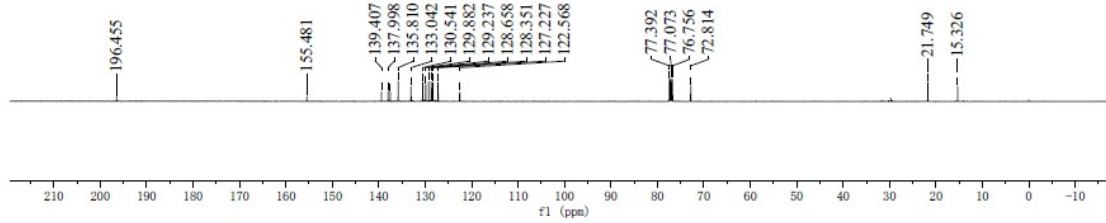

### Single Mass Analysis

Tolerance = 50.0 PPM / DBE: min = -1.5, max = 100.0

Element prediction: Off

Number of isotope peaks used for i-FIT = 3

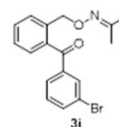

Monoisotopic Mass, Even Electron Ions

21 formula(e) evaluated with 1 results within limits (up to 1 best isotopic matches for each mass)

Elements Used:

C: 0-17 H: 0-16 N: 0-1 O: 0-2 Na: 0-1 Br: 0-1

YF-JI

ECUST institute of Fine Chem

18-Jan-2017

10:19:35

1: TOF MS ES+

1.51e+003

JYF-S-41 32 (0.488) Cm (28:32)

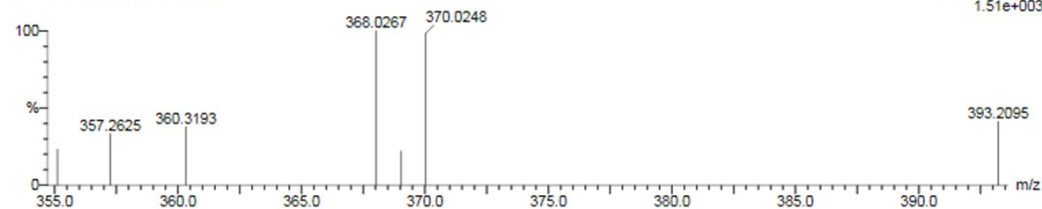

Minimum:

Maximum: 30.0 50.0 100.0

| Mass     | Calc. Mass | mDa | PPM | DBE | i-FIT | i-FIT (Norm) | Formula            |
|----------|------------|-----|-----|-----|-------|--------------|--------------------|
| 368.0267 | 368.0262   | 0.5 | 1.4 | 9.5 | 7.2   | 0.0          | C17 H16 N O2 Na Br |

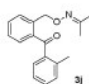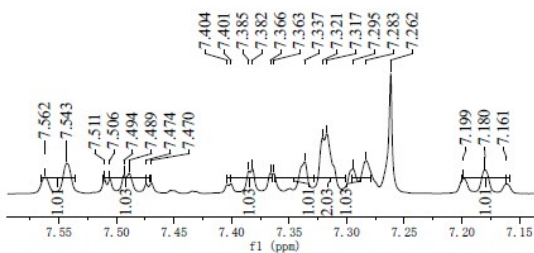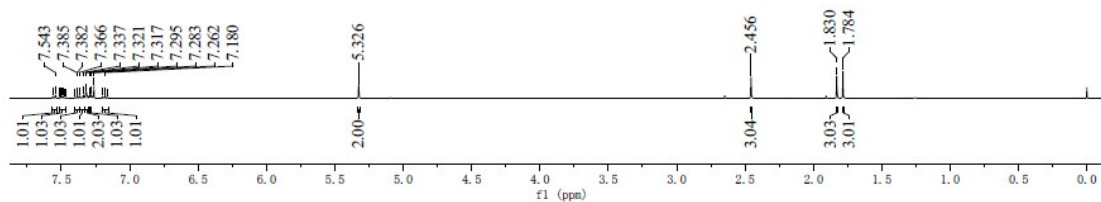

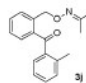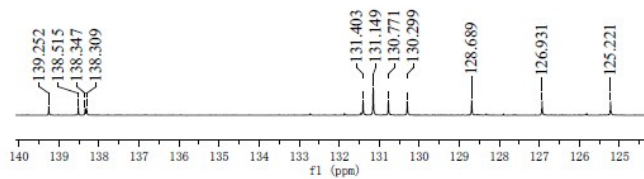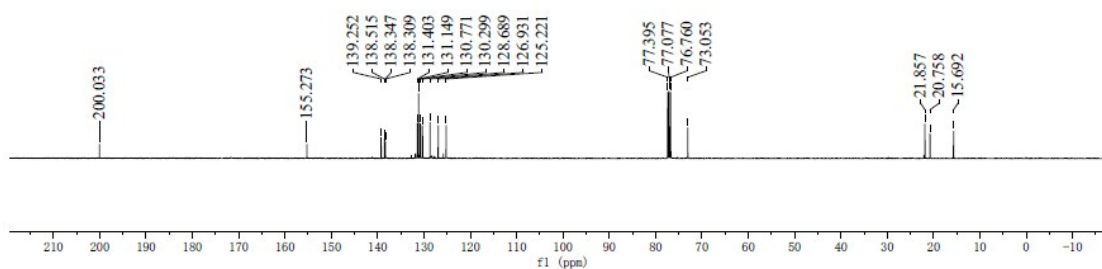

**Single Mass Analysis**

Tolerance = 50.0 PPM / DBE: min = -1.5, max = 100.0

Element prediction: Off

Number of isotope peaks used for i-FIT = 3

Monoisotopic Mass, Even Electron Ions

6 formula(e) evaluated with 2 results within limits (up to 1 best isotopic matches for each mass)

Elements Used:

C: 0-20 H: 0-20 N: 0-1 O: 0-2 Na: 0-1

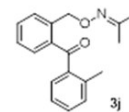

YF-JI

ECUST institute of Fine Chem

06-Mar-2017

JYF-S-603 43 (0.624) Cm (42:44)

21:38:47

1: TOF MS ES+  
5.18e+003

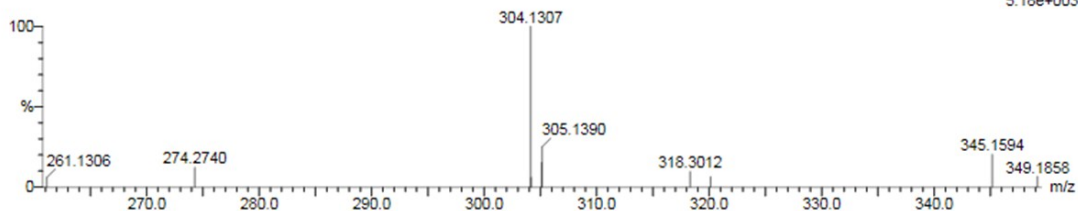

Minimum:

Maximum: 30.0 50.0 -1.5 100.0

| Mass     | Calc. Mass | mDa  | PPM  | DBE | i-FIT | i-FIT (Norm) | Formula         |
|----------|------------|------|------|-----|-------|--------------|-----------------|
| 304.1307 | 304.1313   | -0.6 | -2.0 | 9.5 | 53.2  | 0.0          | C18 H19 N O2 Na |

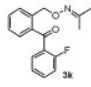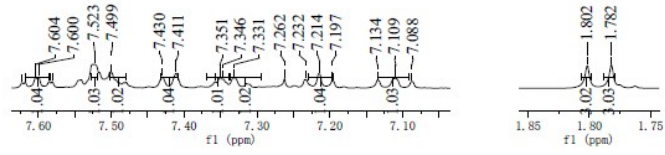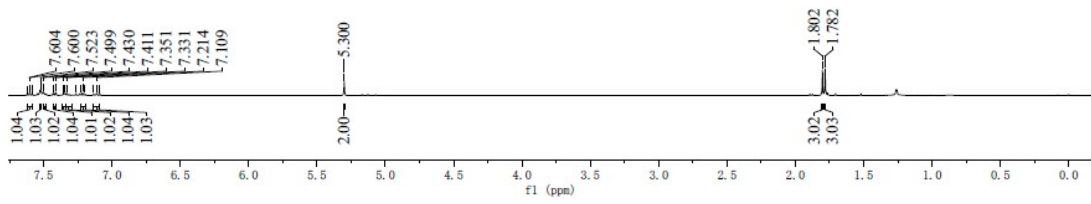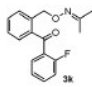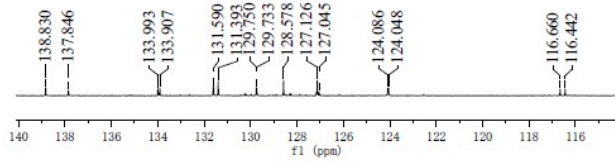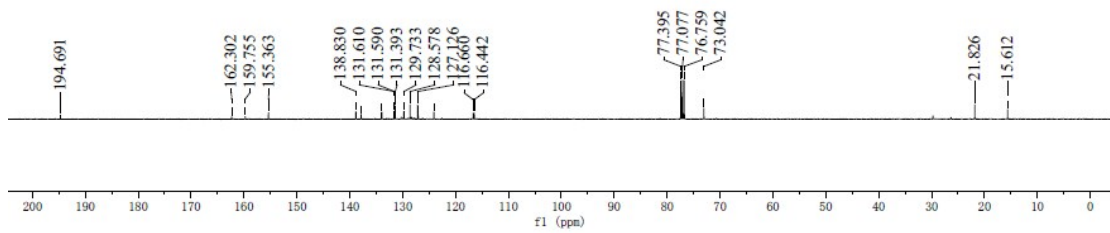



### Single Mass Analysis

Tolerance = 50.0 PPM / DBE: min = -1.5, max = 100.0

Element prediction: Off

Number of isotope peaks used for i-FIT = 3

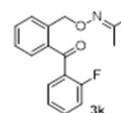

Monoisotopic Mass, Even Electron Ions

16 formula(e) evaluated with 1 results within limits (up to 1 best isotopic matches for each mass)

Elements Used:

C: 0-18 H: 0-20 N: 0-1 O: 0-2 Na: 0-1 F: 0-1

YF-JI

ECUST institute of Fine Chem

06-Mar-2017

22:10:34

JYF-S-602 14 (0.269) Cm (10:16)

1: TOF MS ES+

5.55e+003

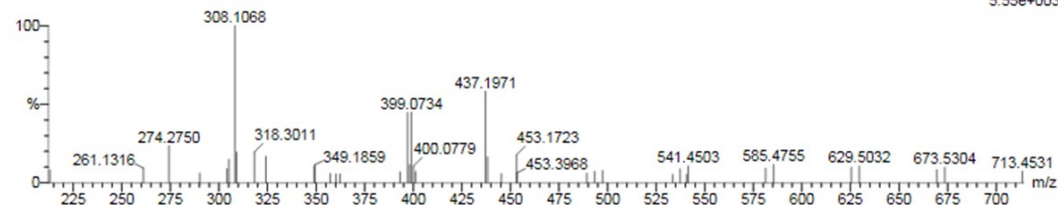

Minimum:

Maximum: 30.0 50.0 100.0

| Mass     | Calc. Mass | mDa | PPM | DBE | i-FIT | i-FIT (Norm) | Formula           |
|----------|------------|-----|-----|-----|-------|--------------|-------------------|
| 308.1068 | 308.1063   | 0.5 | 1.6 | 9.5 | 22.5  | 0.0          | C17 H16 N O2 Na F |

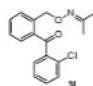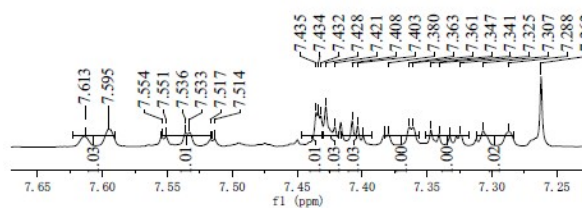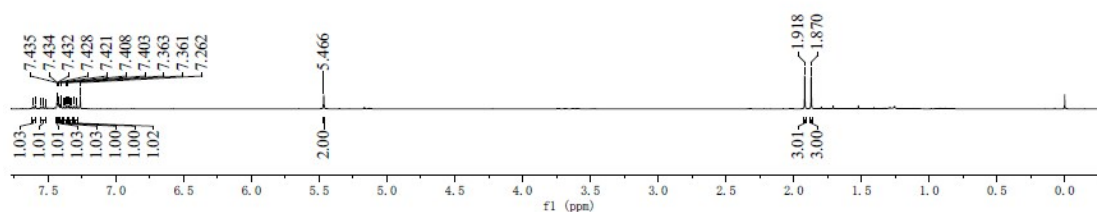



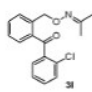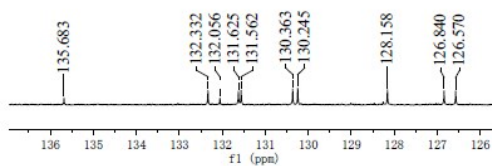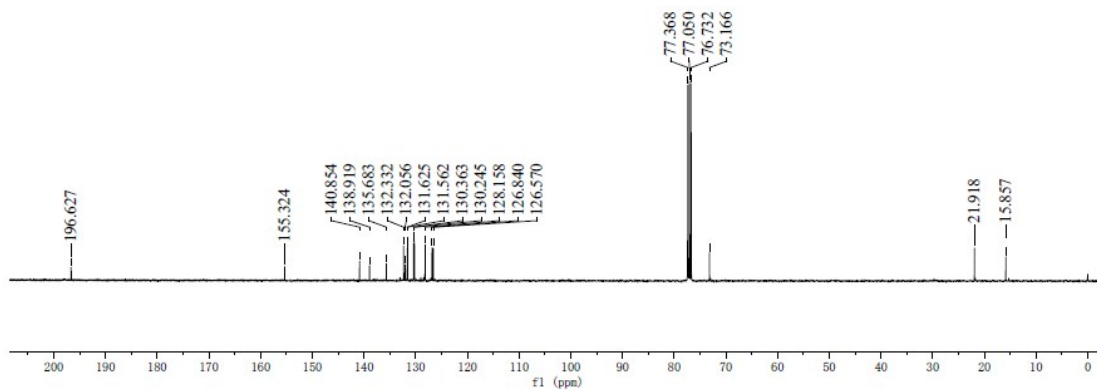

### Single Mass Analysis

Tolerance = 50.0 PPM / DBE: min = -1.5, max = 100.0

Element prediction: Off

Number of isotope peaks used for i-FIT = 3

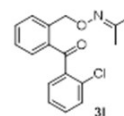

Monoisotopic Mass, Even Electron Ions

29 formula(e) evaluated with 3 results within limits (up to 1 best isotopic matches for each mass)

Elements Used:

C: 0-20 H: 0-20 N: 0-1 O: 0-3 Na: 0-1 Cl: 0-1

YF-JI

ECUST institute of Fine Chem

06-Mar-2017

20:48:26

1: TOF MS ES+

8.44e+002

JYF-S-539 28 (0.451) Cm (28)

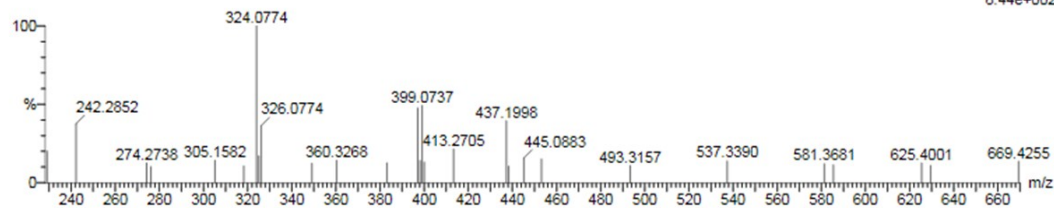

Minimum: 30.0 50.0 -1.5  
Maximum: 30.0 50.0 100.0

| Mass     | Calc. Mass | mDa | PPM | DBE | i-FIT | i-FIT (Norm) | Formula            |
|----------|------------|-----|-----|-----|-------|--------------|--------------------|
| 324.0774 | 324.0767   | 0.7 | 2.2 | 9.5 | 7.4   | 0.0          | C17 H16 N O2 Na Cl |

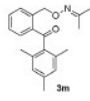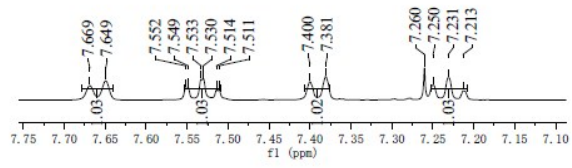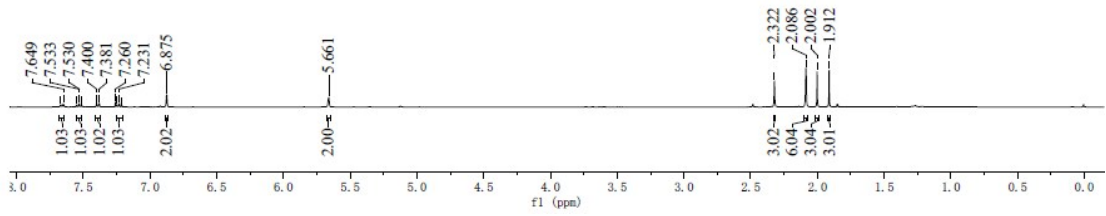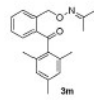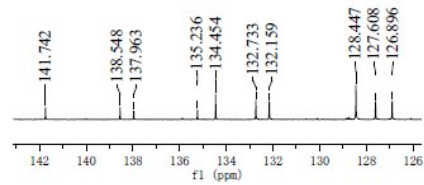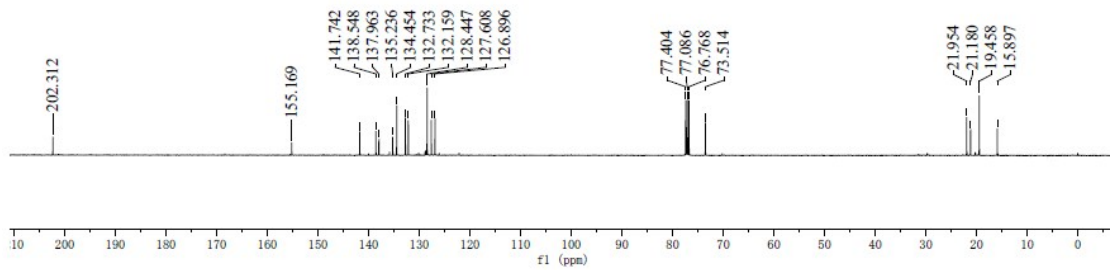

**Single Mass Analysis**

Tolerance = 50.0 PPM / DBE: min = -1.5, max = 100.0  
 Element prediction: Off  
 Number of isotope peaks used for i-FIT = 3

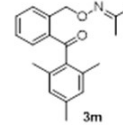

Monoisotopic Mass, Even Electron Ions  
 44 formula(e) evaluated with 3 results within limits (up to 1 best isotopic matches for each mass)  
 Elements Used:  
 C: 0-20 H: 0-40 N: 0-1 O: 0-5 Na: 0-1  
 YF-JI

ECUST institute of Fine Chem

05-Jan-2017  
 21:54:47  
 1: TOF MS ES+  
 2.22e+003

YF-S-521 36 (0.530) Cm (34:36)

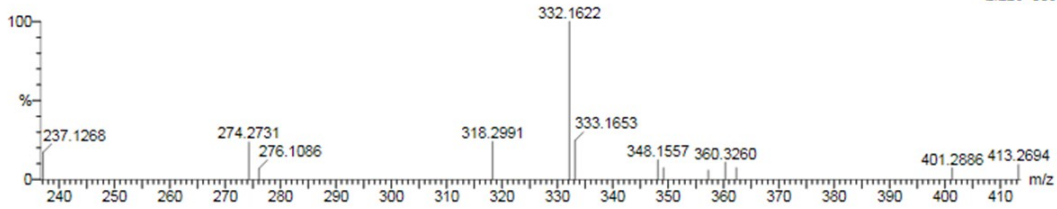

Minimum: -1.5  
 Maximum: 30.0 50.0 100.0

| Mass     | Calc. Mass | mDa  | PPM  | DBE | i-FIT | i-FIT (Norm) | Formula         |
|----------|------------|------|------|-----|-------|--------------|-----------------|
| 332.1622 | 332.1626   | -0.4 | -1.2 | 9.5 | 20.6  | 0.0          | C20 H23 N O2 Na |

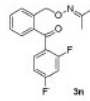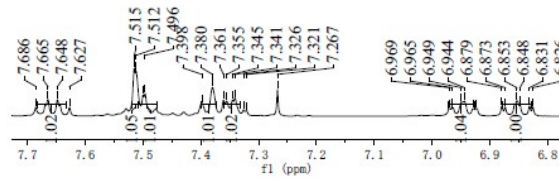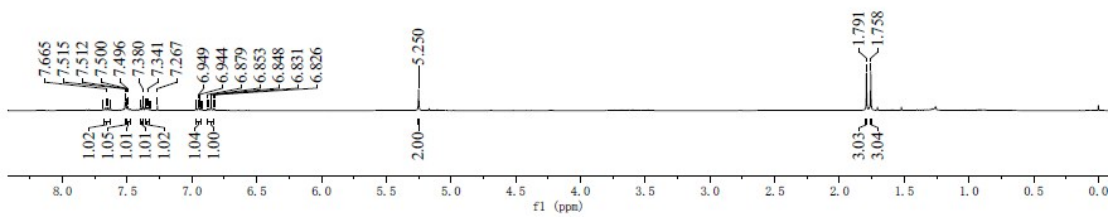

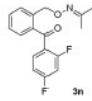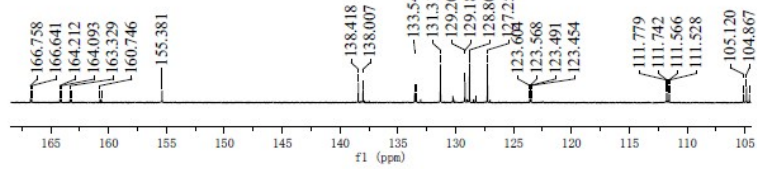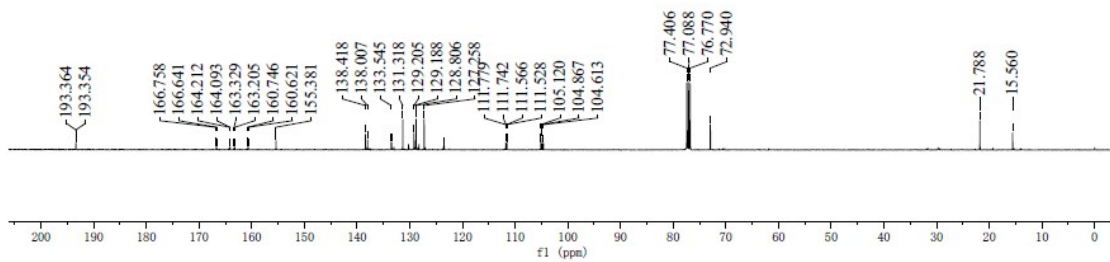

### Single Mass Analysis

Tolerance = 50.0 PPM / DBE: min = -1.5, max = 100.0

Element prediction: Off

Number of isotope peaks used for i-FIT = 3

Monoisotopic Mass, Even Electron Ions

32 formula(e) evaluated with 1 results within limits (up to 1 best isotopic matches for each mass)

Elements Used:

C: 0-17 H: 0-16 N: 0-1 O: 0-2 F: 0-2 Na: 0-1

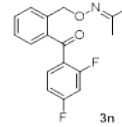

YF-JI

ECUST institute of Fine Chem

18-Jan-2017

10:15:48

1: TOF MS ES+

3.03e+003

JYF-S-40 4 (0.149) Cm (4:6)

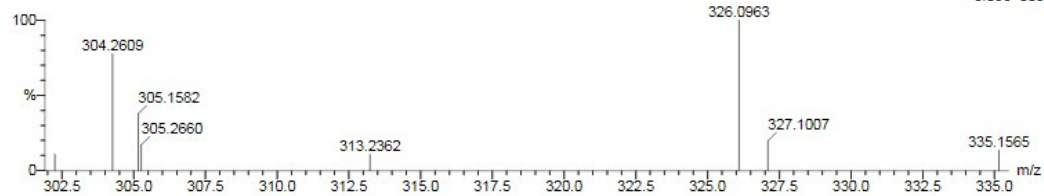

Minimum:

Maximum: 30.0 50.0 -1.5 100.0

| Mass | Calc. Mass | mDa | PPM | DBE | i-FIT | i-FIT (Norm) | Formula |
|------|------------|-----|-----|-----|-------|--------------|---------|
|------|------------|-----|-----|-----|-------|--------------|---------|

|          |          |      |      |     |      |     |                    |
|----------|----------|------|------|-----|------|-----|--------------------|
| 326.0963 | 326.0969 | -0.6 | -1.8 | 9.5 | 21.5 | 0.0 | C17 H15 N O2 F2 Na |
|----------|----------|------|------|-----|------|-----|--------------------|

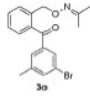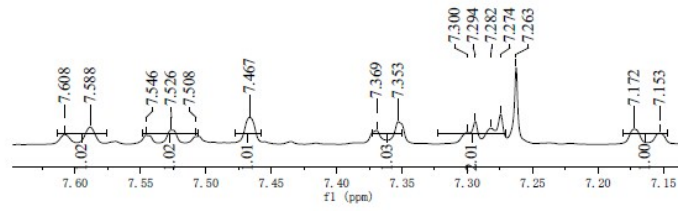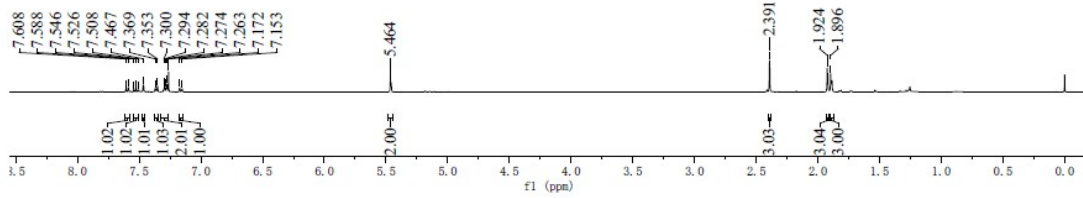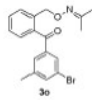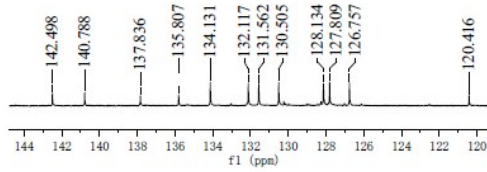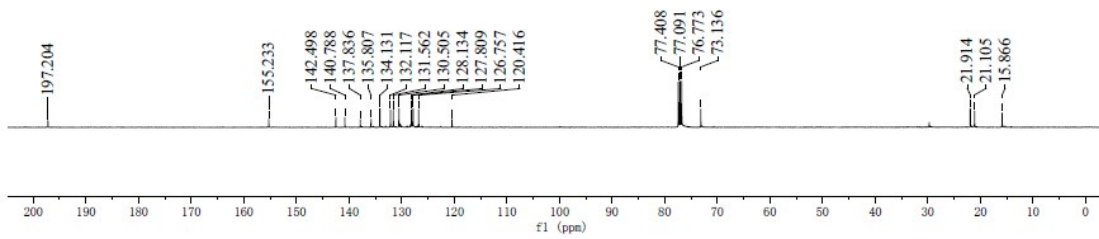

### Single Mass Analysis

Tolerance = 50.0 PPM / DBE: min = -1.5, max = 100.0

Element prediction: Off

Number of isotope peaks used for i-FIT = 3

Monoisotopic Mass, Even Electron Ions

19 formula(e) evaluated with 2 results within limits (up to 1 best isotopic matches for each mass)

Elements Used:

C: 0-20 H: 0-20 N: 0-1 O: 0-2 Na: 0-1 Br: 0-1

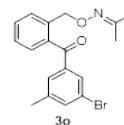

YF-JI

ECUST institute of Fine Chem

06-Mar-2017

JYF-S-605 26 (0.410) Cm (22:30)

21:42:02  
1: TOF MS ES+  
5.19e+003

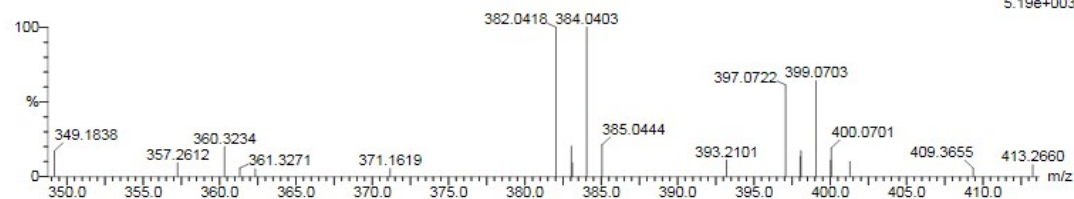

Minimum: -1.5  
Maximum: 100.0

| Mass     | Calc. Mass | mDa  | PPM  | DBE | i-FIT | i-FIT (Norm) | Formula            |
|----------|------------|------|------|-----|-------|--------------|--------------------|
| 382.0418 | 382.0419   | -0.1 | -0.3 | 9.5 | 18.1  | 0.0          | C18 H18 N O2 Na Br |

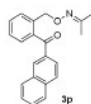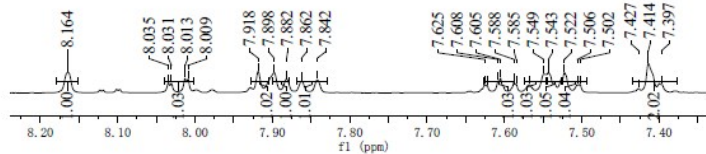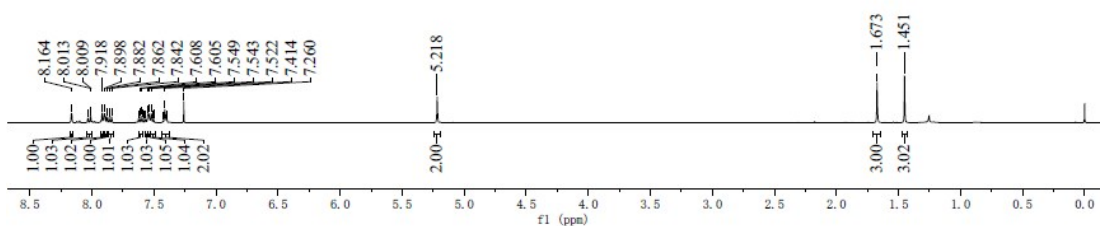

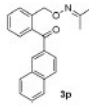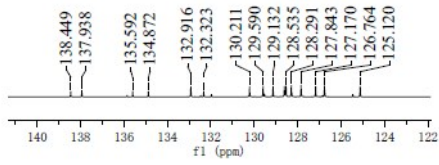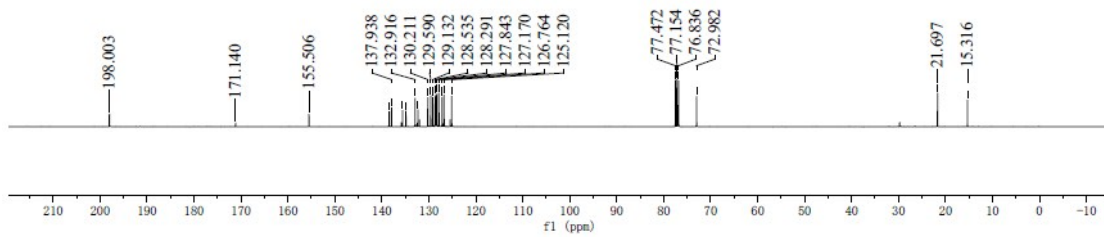

### Single Mass Analysis

Tolerance = 50.0 PPM / DBE: min = -1.5, max = 100.0

Element prediction: Off

Number of isotope peaks used for i-FIT = 3

Monoisotopic Mass, Even Electron Ions

5 formula(e) evaluated with 1 results within limits (up to 1 best isotopic matches for each mass)

Elements Used:

C: 0-22 H: 0-20 N: 0-1 O: 0-2 Na: 0-1

YF-JI

ECUST institute of Fine Chem

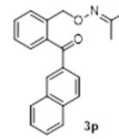

06-Mar-2017

21:49:13

1: TOF MS ES+

4.24e+003

JYF-S-607 109 (1.433) Cm (108:113)

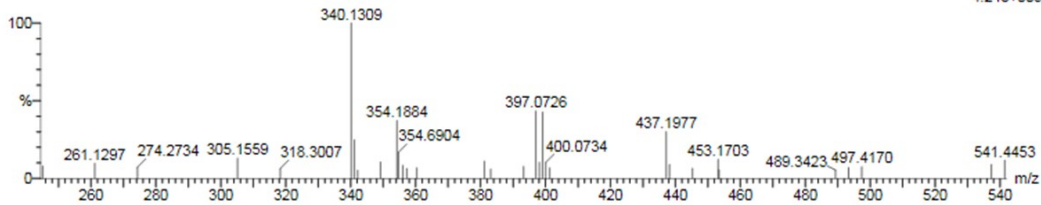

Minimum:

Maximum:

30.0 50.0 -1.5  
100.0

| Mass     | Calc. Mass | mDa  | PPM  | DBE  | i-FIT | i-FIT (Norm) | Formula         |
|----------|------------|------|------|------|-------|--------------|-----------------|
| 340.1309 | 340.1313   | -0.4 | -1.2 | 12.5 | 11.7  | 0.0          | C21 H19 N O2 Na |



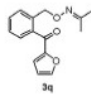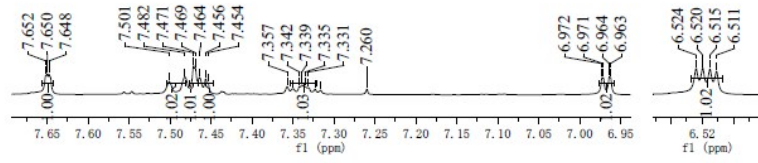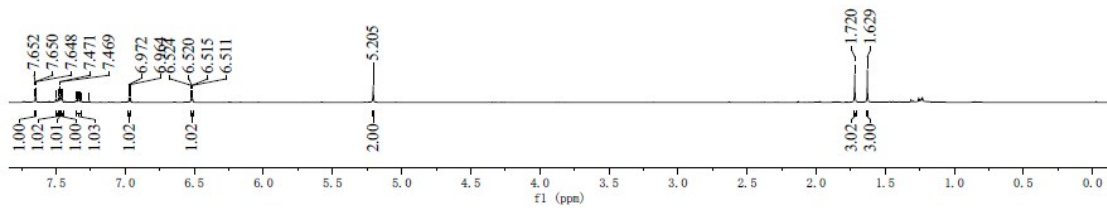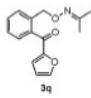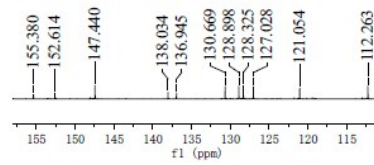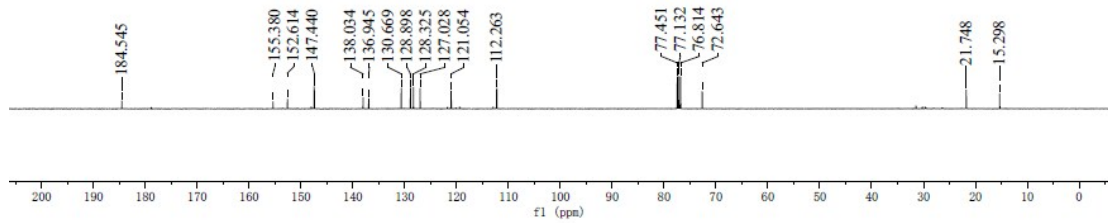



Elemental Composition Report

Multiple Mass Analysis: 29 mass(es) processed

Tolerance = 5.0 mDa / DBE: min = -1.5, max = 100.0

Element prediction: Off

Monoisotopic Mass, Odd and Even Electron Ions 315 formula(e) evaluated with

29 results within limits (up to 50 closest results for each mass)

Elements Used:

C: 0-15 H: 0-15 N: 0-1 O: 0-3

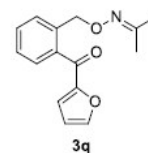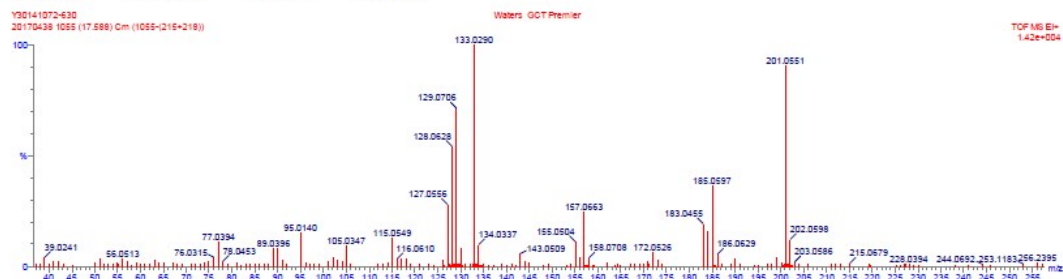

| Mass     | RA    | Calc. Mass | mDa  | PPM  | DBE | i-FIT | Formula   |
|----------|-------|------------|------|------|-----|-------|-----------|
| 201.0551 | 90.10 | 201.0552   | -0.1 | -0.5 | 8.5 | 4.3   | C12 H9 O3 |

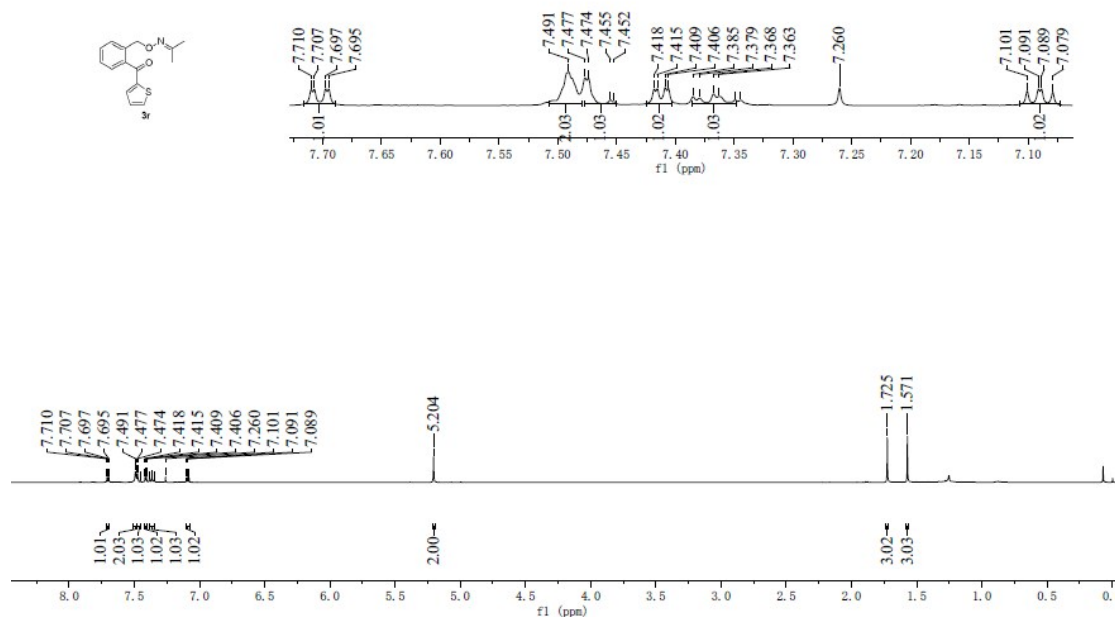

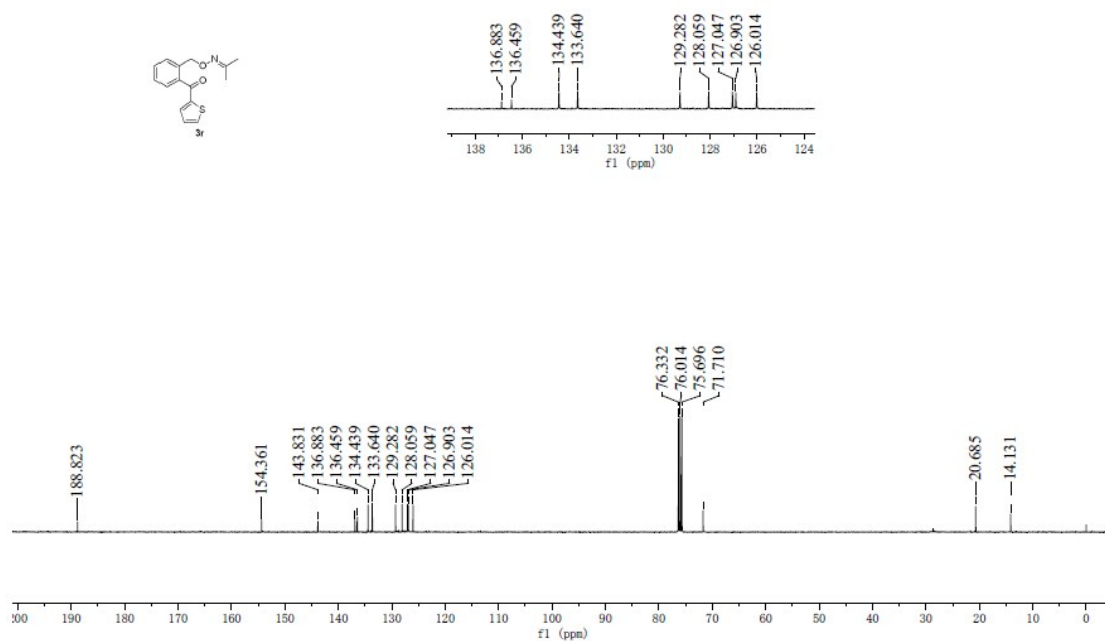

Elemental Composition Report

Multiple Mass Analysis: 29 mass(es) processed

Tolerance = 5.0 mDa / DBE: min = -1.5, max = 100.0

Element prediction: Off

Monoisotopic Mass, Odd and Even Electron Ions 466 formula(e) evaluated with 58 results within limits (up to 50 closest results for each mass)

Elements Used:

C: 0-15 H: 0-15 N: 0-1 O: 0-2 S: 0-1

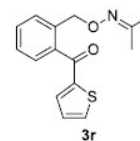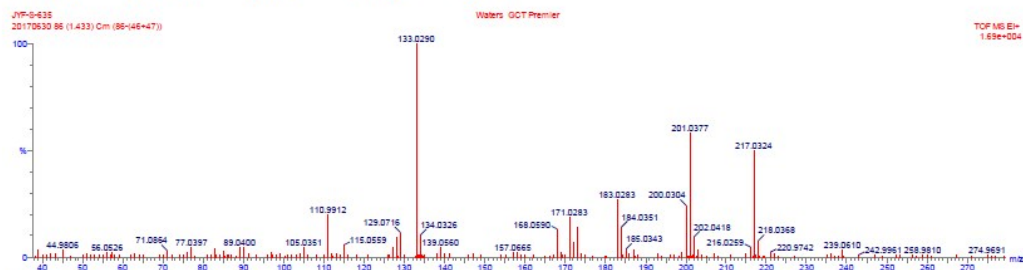

Minimum: 3.00 Maximum: 100.00

Mass RA Calc. Mass mDa PPM DBE i-FIT Formula

217.0324 49.74 217.0323 0.1 0.5 8.5 2777586.8 C12H9O2S

## 4.2 Copies of the spectra for Tables 3

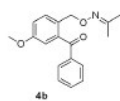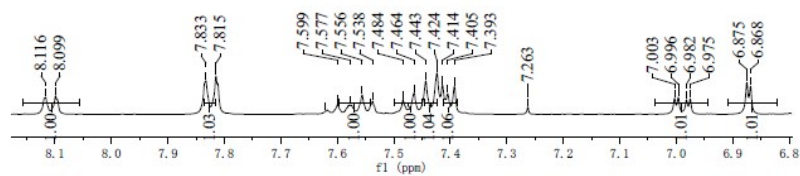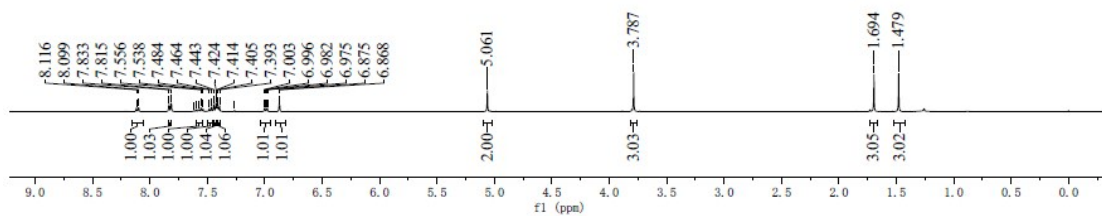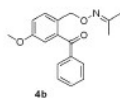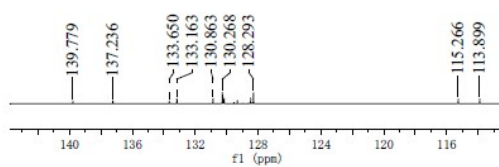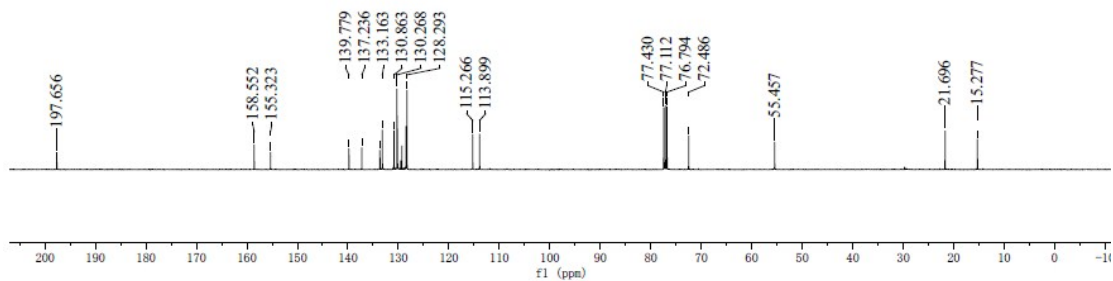

Elemental Composition Report

Multiple Mass Analysis: 81 mass(es) processed

Tolerance = 5.0 mDa / DBE: min = -1.5, max = 100.0

Element prediction: Off

Monoisotopic Mass, Odd and Even Electron Ions 1059 formula(e)

evaluated with 77 results within limits (up to 50 closest results for each mass)

Elements Used:

C: 0-18 H: 0-19 N: 0-1 O: 0-3

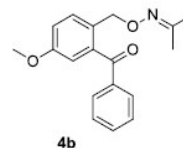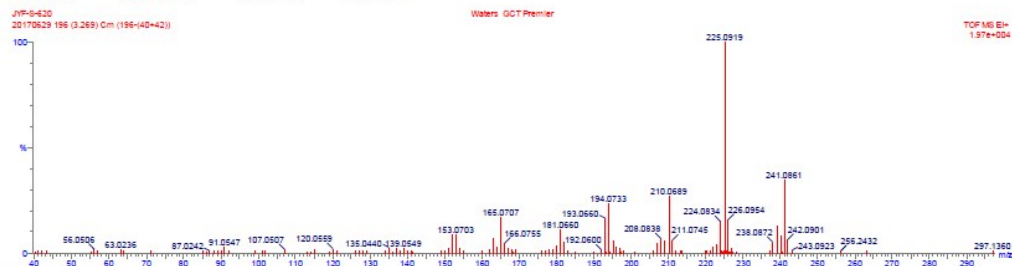

| Mass     | RA   | Calc. Mass | mDa  | PPM  | DBE  | i-FIT     | Formula   |
|----------|------|------------|------|------|------|-----------|-----------|
| 297.1360 | 0.28 | 297.1365   | -0.5 | -1.7 | 10.0 | 5546041.5 | C18H19NO3 |

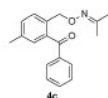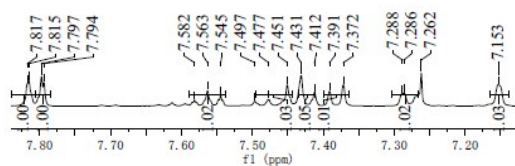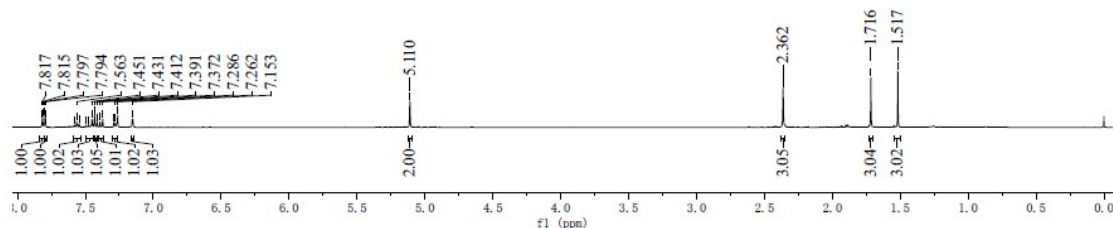

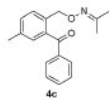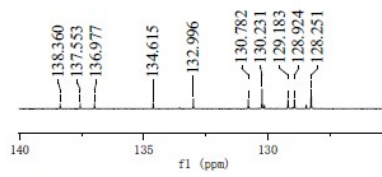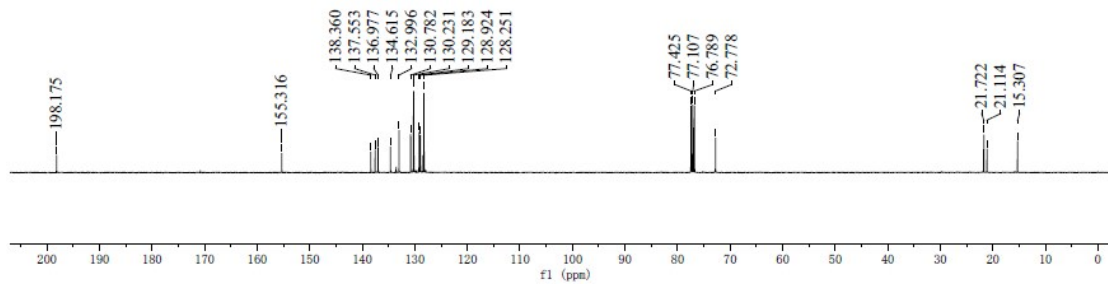

### Elemental Composition Report

Multiple Mass Analysis: 25 mass(es) processed

Tolerance = 5.0 mDa / DBE: min = -1.5, max = 100.0

Element prediction: Off

Monoisotopic Mass, Odd and Even Electron Ions 264 formula(e) evaluated with 24 results within limits (up to 50 closest results for each mass)

Elements Used:

C: 0-18 H: 0-19 N: 0-1 O: 0-2

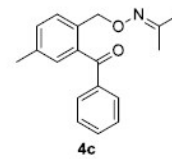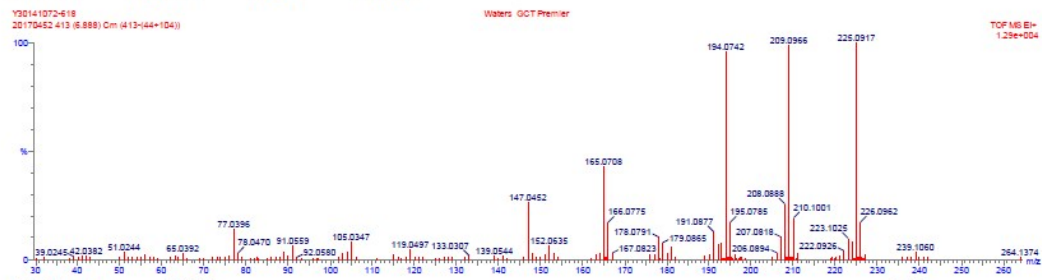

| Mass     | RA     | Calc. Mass | mDa | PPM | DBE | i-FIT | Formula  |
|----------|--------|------------|-----|-----|-----|-------|----------|
| 225.0917 | 100.00 | 225.0916   | 0.1 | 0.4 | 9.5 | 0.7   | C15H13O2 |

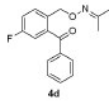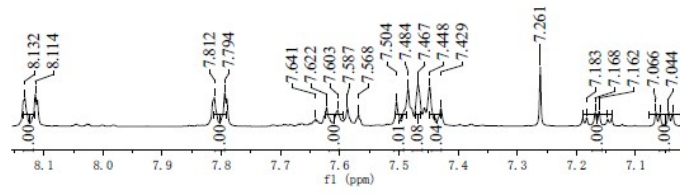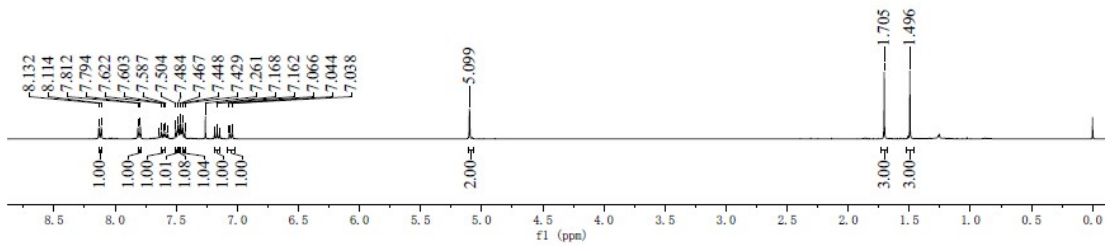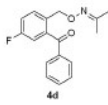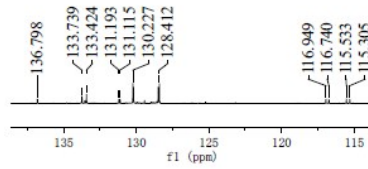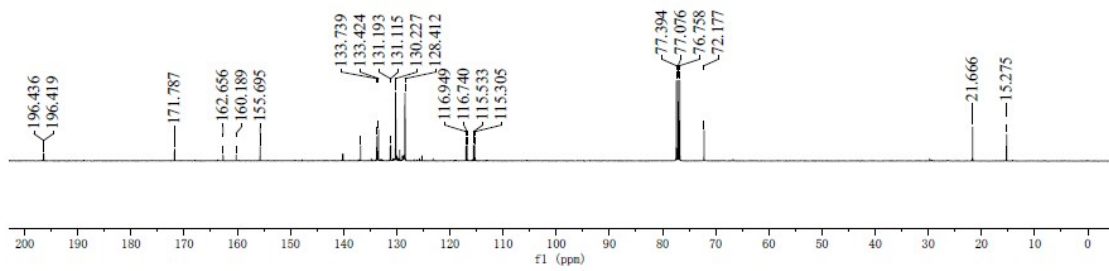

Elemental Composition Report

Multiple Mass Analysis: 30 mass(es) processed

Tolerance = 5.0 mDa / DBE: min = -1.5, max = 100.0

Element prediction: Off

Monoisotopic Mass, Odd and Even Electron Ions

514 formula(e) evaluated with 51 results within limits (up to 50 closest results for each mass)

Elements Used:

C: 0-17 H: 0-16 N: 0-1 O: 0-2 F: 0-1

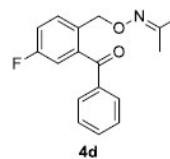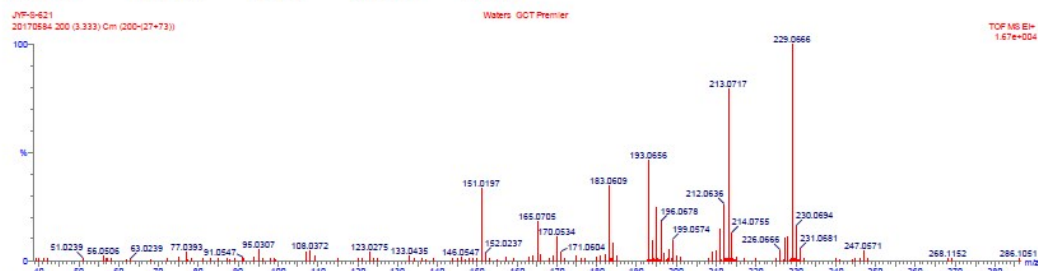

|          |        |            |     |     |      |       |           |       |
|----------|--------|------------|-----|-----|------|-------|-----------|-------|
| Minimum: | 3.00   |            |     |     |      |       |           | -1.5  |
| Maximum: | 100.00 |            |     | 5.0 | 10.0 |       |           | 100.0 |
| Mass     | RA     | Calc. Mass | mDa | PPM | DBE  | i-FIT | Formula   |       |
| 229.0666 | 100.00 | 229.0665   | 0.1 | 0.4 | 9.5  | 199.7 | C14H10O2F |       |

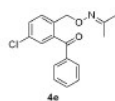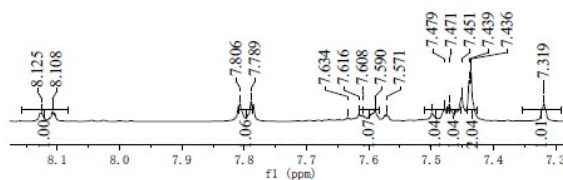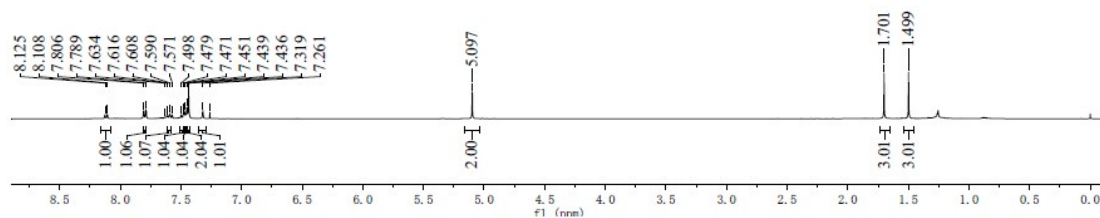



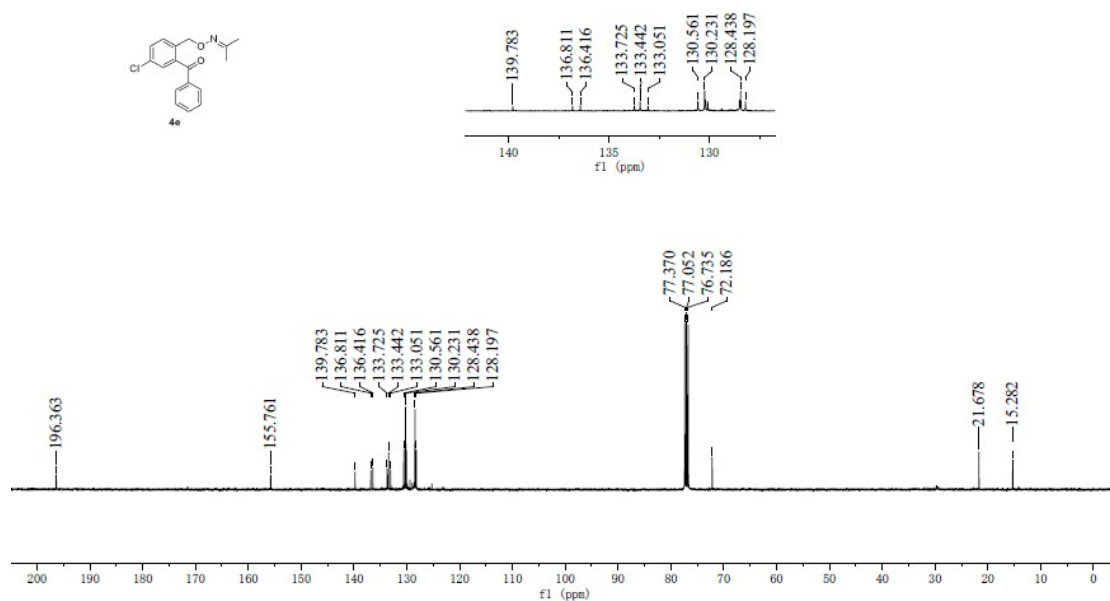

#### Elemental Composition Report

Multiple Mass Analysis: 29 mass(es) processed  
 Tolerance = 5.0 mDa / DBE: min = -1.5, max = 100.0  
 Element prediction: Off

Monoisotopic Mass, Odd and Even Electron Ions

969 formula(e) evaluated with 75 results within limits (up to 50 closest results for each mass)

Elements Used:

C: 0-17 H: 0-16 N: 0-1 O: 0-2 35Cl: 0-1 37Cl: 0-1

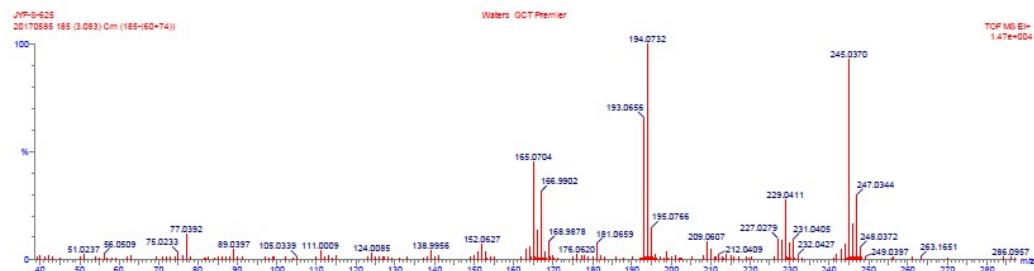

|          |        |            |     |     |      |       |               |
|----------|--------|------------|-----|-----|------|-------|---------------|
| Minimum: | 3.00   |            |     |     |      |       | -1.5          |
| Maximum: | 100.00 |            |     | 5.0 | 10.0 |       | 100.0         |
| Mass     | RA     | Calc. Mass | mDa | PPM | DBE  | i-FIT | Formula       |
| 245.0370 | 92.51  | 245.0369   | 0.1 | 0.4 | 9.5  | 15.1  | C14H10O2 35Cl |



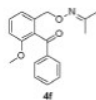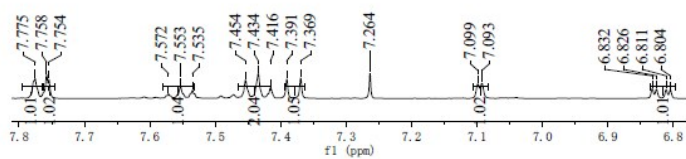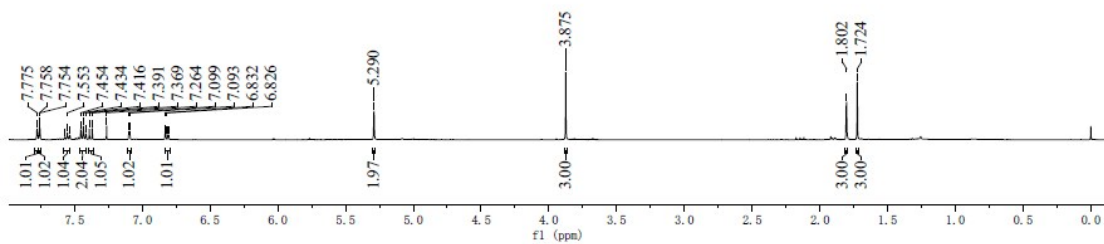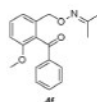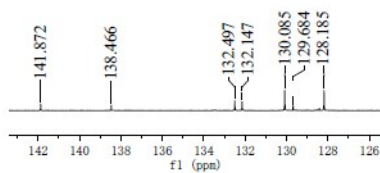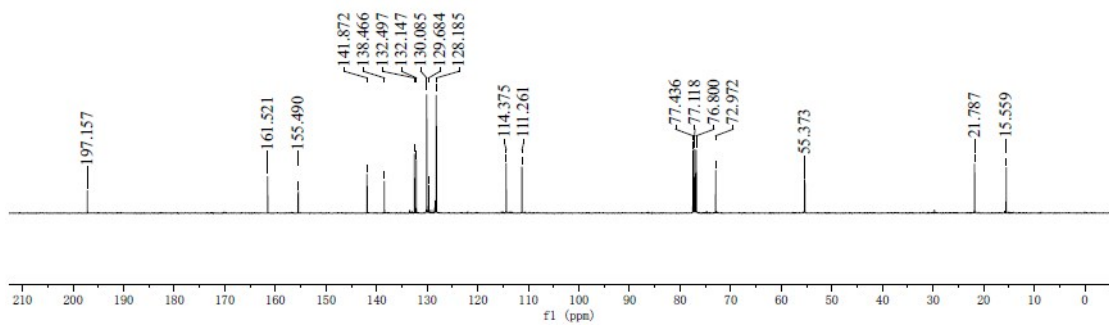

Elemental Composition Report

Multiple Mass Analysis: 27 mass(es) processed

Tolerance = 5.0 mDa / DBE: min = -1.5, max = 100.0

Element prediction: Off

Monoisotopic Mass, Odd and Even Electron Ions

367 formula(e) evaluated with 31 results within limits (up to 50 closest results for each mass)

Elements Used:

C: 0-18 H: 0-19 N: 0-1 O: 0-3

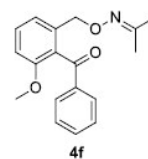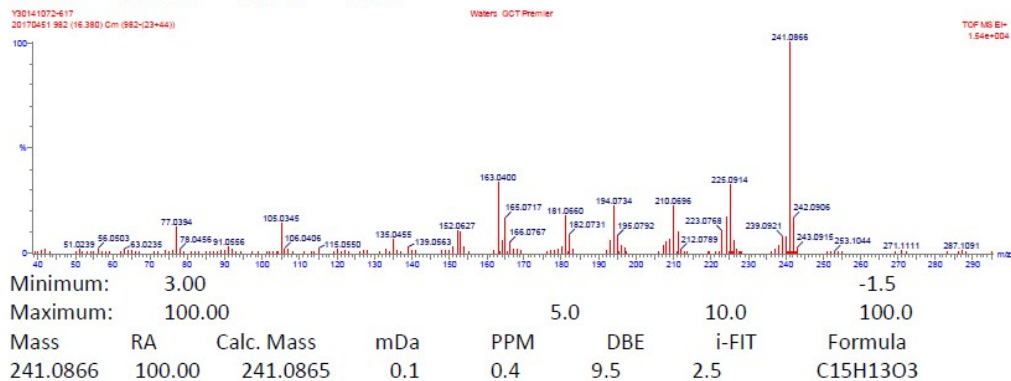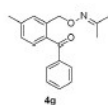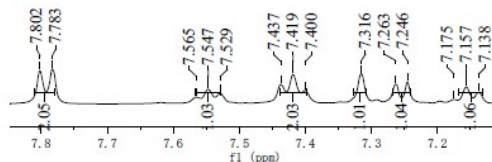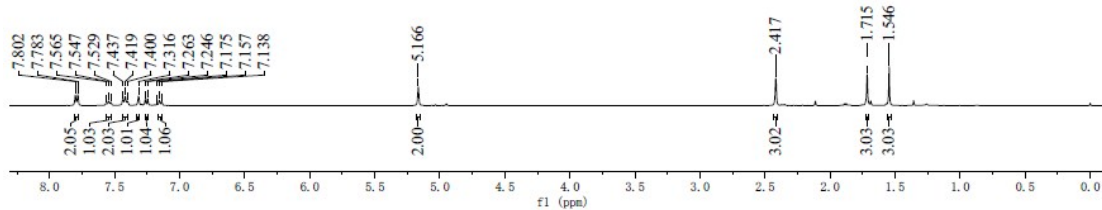

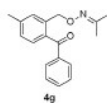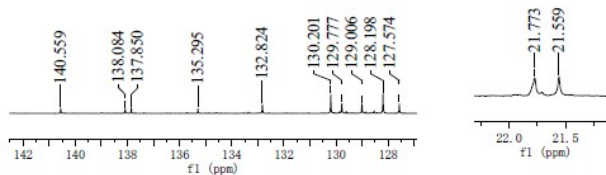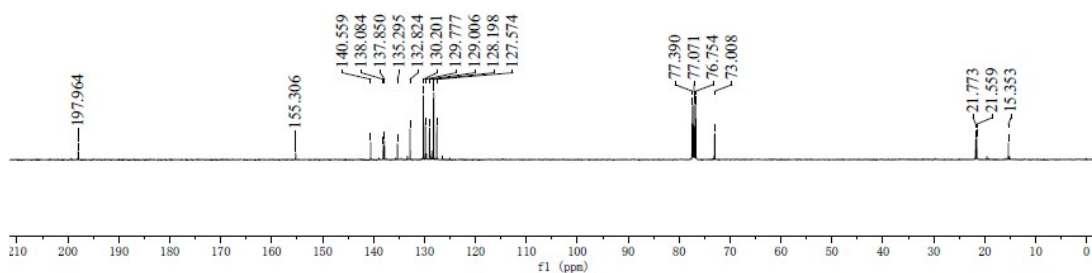

### Single Mass Analysis

Tolerance = 50.0 PPM / DBE: min = -1.5, max = 100.0

Element prediction: Off

Number of isotope peaks used for i-FIT = 3

Monoisotopic Mass, Even Electron Ions

9 formula(e) evaluated with 1 results within limits (up to 1 best isotopic matches for each mass)

Elements Used:

C: 0-18 H: 0-20 N: 0-1 O: 0-2 Na: 0-1

YF-JI

ECUST institute of Fine Chem

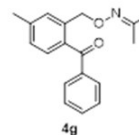

06-Mar-2017

22:06:28

1: TOF MS ES+

7.40e+003

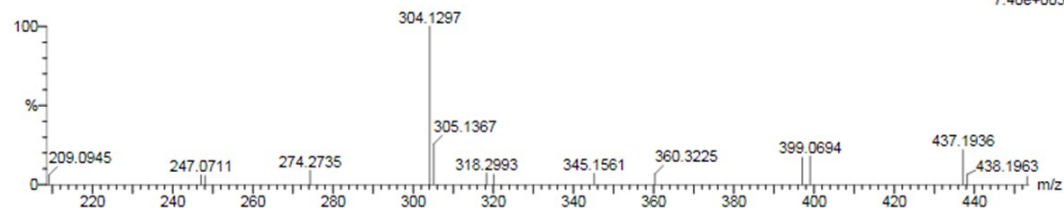

Minimum:

Maximum: 30.0 50.0 -1.5

100.0

| Mass | Calc. Mass | mDa | PPM | DBE | i-FIT | i-FIT (Norm) | Formula |
|------|------------|-----|-----|-----|-------|--------------|---------|
|------|------------|-----|-----|-----|-------|--------------|---------|

|          |          |      |      |     |      |     |                 |
|----------|----------|------|------|-----|------|-----|-----------------|
| 304.1297 | 304.1313 | -1.6 | -5.3 | 9.5 | 29.0 | 0.0 | C18 H19 N O2 Na |
|----------|----------|------|------|-----|------|-----|-----------------|

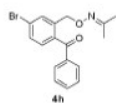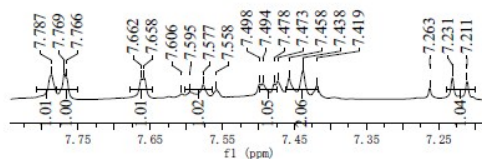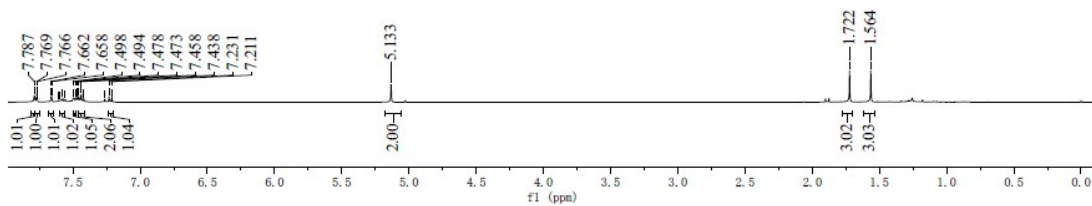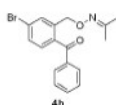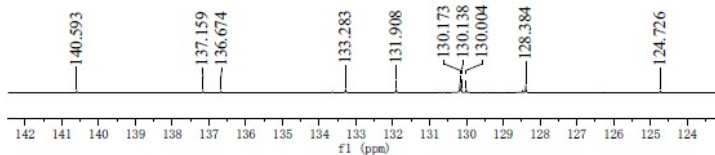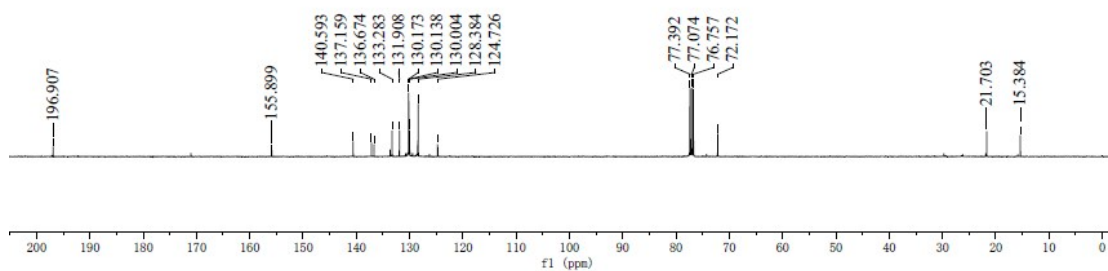

Elemental Composition Report

Multiple Mass Analysis: 44 mass(es) processed

Tolerance = 5.0 mDa / DBE: min = -1.5, max = 100.0

Element prediction: Off

Monoisotopic Mass, Odd and Even Electron Ions

1189 formula(e) evaluated with 58 results within limits (up to 50 closest results for each mass)

Elements Used:

C: 0-17 H: 0-16 N: 0-1 O: 0-2 79Br: 0-1 81Br: 0-1

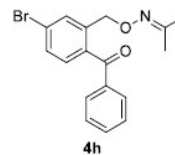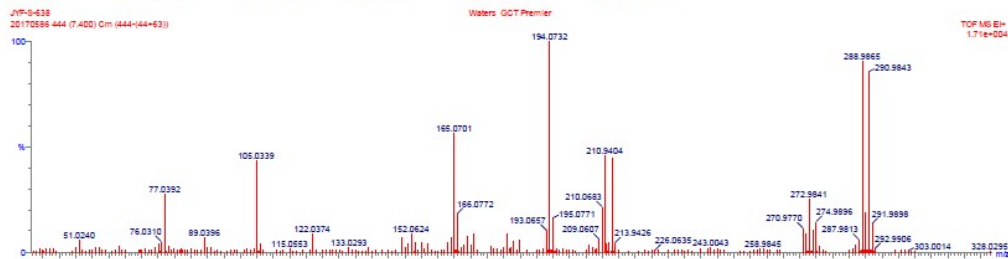

Minimum: 3.00

Maximum: 100.00

5.0

10.0

-1.5

| Mass     | RA    | Calc. Mass | mDa | PPM | DBE | i-FIT | Formula       |
|----------|-------|------------|-----|-----|-----|-------|---------------|
| 288.9865 | 90.44 | 288.9864   | 0.1 | 0.3 | 9.5 | 90.3  | C14H10O2 79Br |

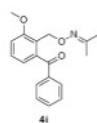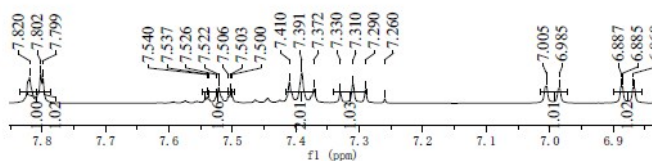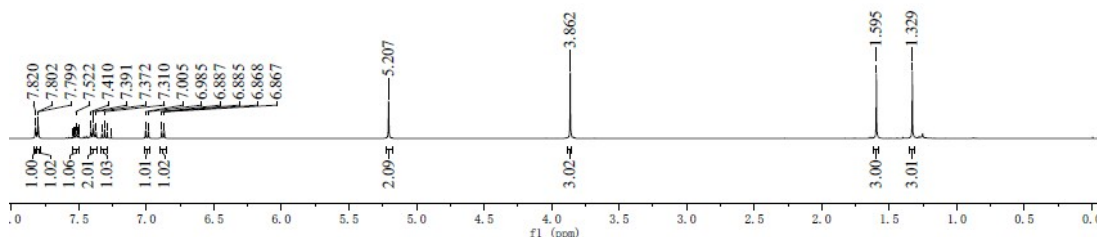

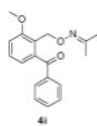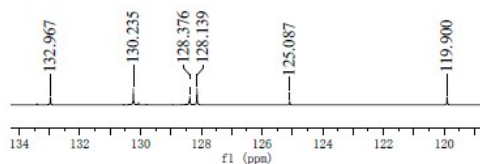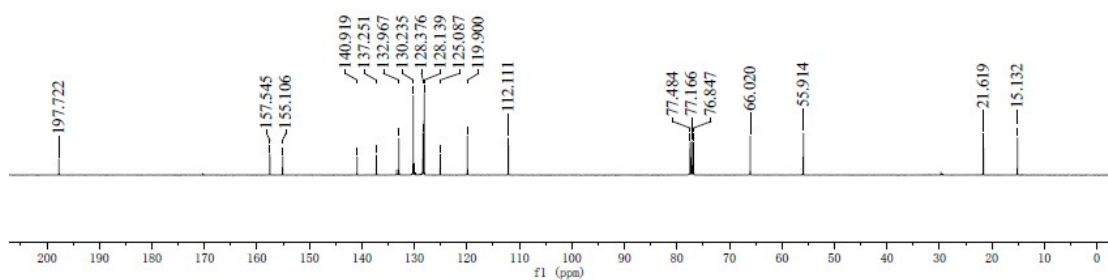

Elemental Composition Report

Multiple Mass Analysis: 39 mass(es) processed

Tolerance = 5.0 mDa / DBE: min = -1.5, max = 100.0

Element prediction: Off

Monoisotopic Mass, Odd and Even Electron Ions

523 formula(e) evaluated with 41 results within limits (up to 50 closest results for each mass)

Elements Used:

C: 0-18 H: 0-19 N: 0-1 O: 0-3

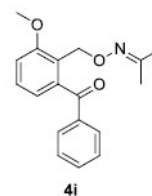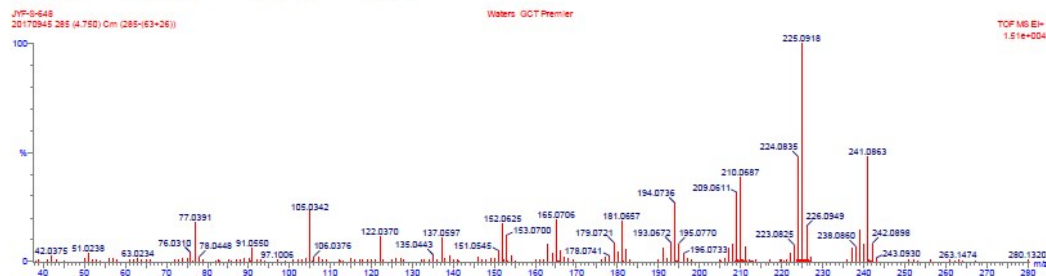

| Mass     | RA    | Calc. Mass | mDa  | PPM  | DBE | i-FIT | Formula  |
|----------|-------|------------|------|------|-----|-------|----------|
| 241.0863 | 47.56 | 241.0865   | -0.2 | -0.8 | 9.5 | 0.3   | C15H13O3 |

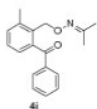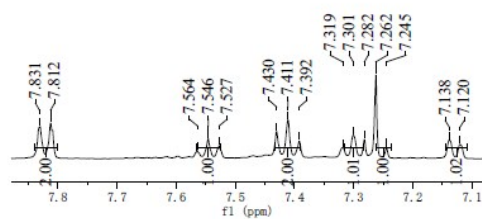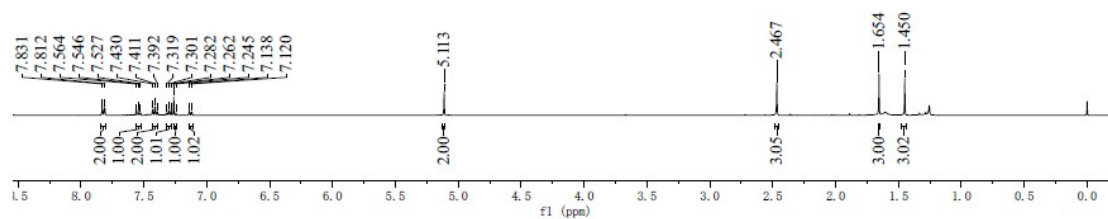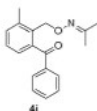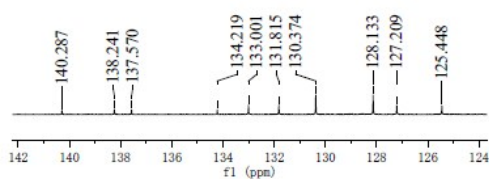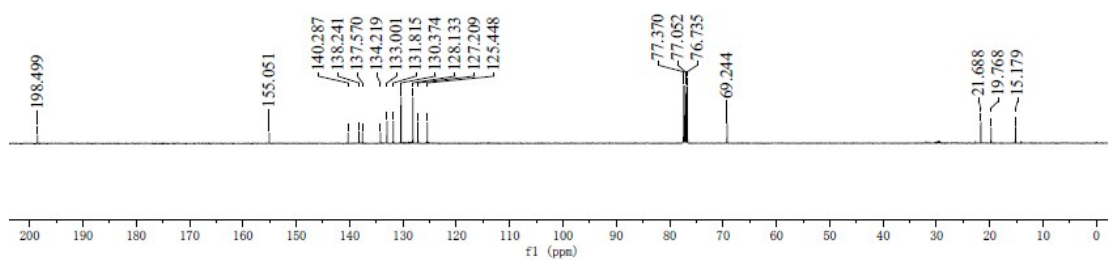



### Single Mass Analysis

Tolerance = 50.0 PPM / DBE: min = -1.5, max = 100.0

Element prediction: Off

Number of isotope peaks used for i-FIT = 3

Monoisotopic Mass, Even Electron Ions

12 formula(e) evaluated with 1 results within limits (up to 1 closest results for each mass)

Elements Used:

C: 0-18 H: 0-40 N: 0-1 O: 0-2 Na: 0-1

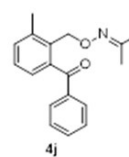

YF-JI

ECUST institute of Fine Chem

07-Jul-2016

JYF-S-417 105 (0.740) Cm (101:109)

22:32:46

1: TOF MS ES+

1.96e+004

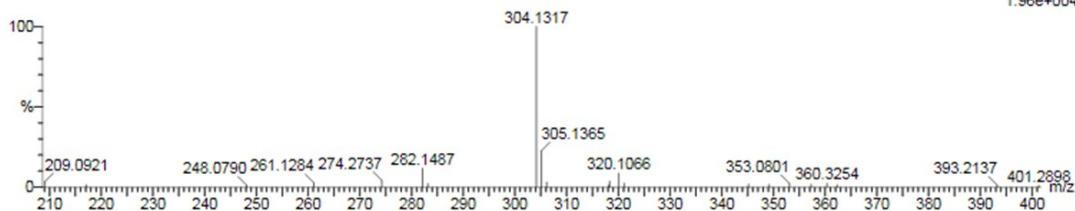

Minimum:

Maximum: 300.0 50.0 -1.5

| Mass     | Calc. Mass | mDa | PPM | DBE | i-FIT | i-FIT (Norm) | Formula         |
|----------|------------|-----|-----|-----|-------|--------------|-----------------|
| 304.1317 | 304.1313   | 0.4 | 1.3 | 9.5 | 15.5  | 0.0          | C18 H19 N O2 Na |

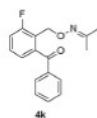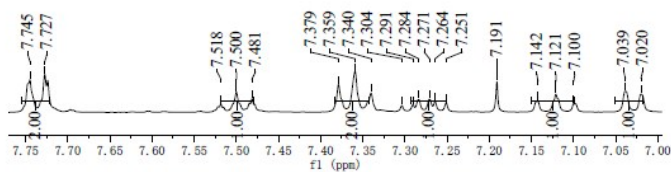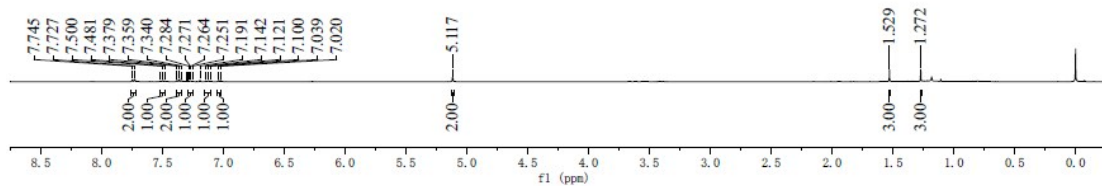



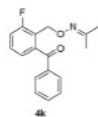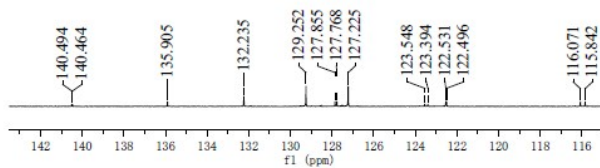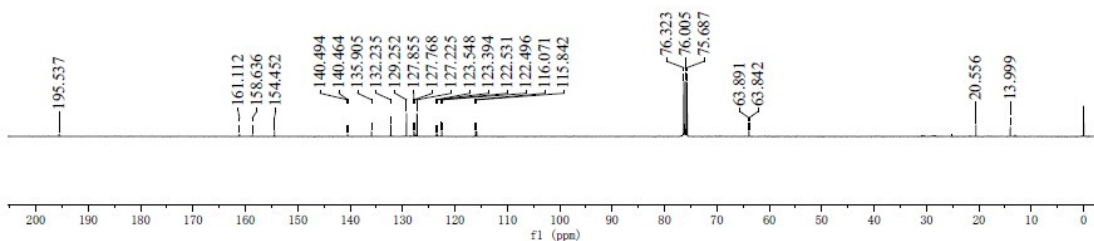

**Single Mass Analysis**

Tolerance = 50.0 PPM / DBE: min = -1.5, max = 100.0  
 Element prediction: Off  
 Number of isotope peaks used for i-FIT = 3

Monoisotopic Mass, Even Electron Ions  
 26 formula(e) evaluated with 1 results within limits (up to 1 best isotopic matches for each mass)  
 Elements Used:  
 C: 0-18 H: 0-20 N: 0-1 O: 0-2 Na: 0-1 F: 0-2

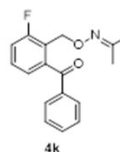

YF-JI

ECUST institute of Fine Chem

06-Mar-2017  
 22:03:03  
 1: TOF MS ES+  
 5.54e+002

JYF-S-511 45 (0.640) Cm (40.46)

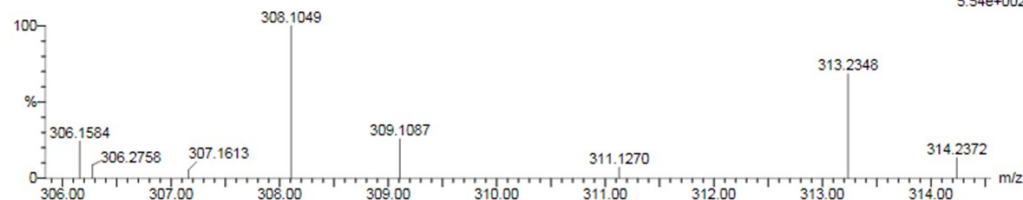

Minimum: 30.0 50.0 -1.5  
 Maximum: 100.0

| Mass     | Calc. Mass | mDa  | PPM  | DBE | i-FIT | i-FIT (Norm) | Formula           |
|----------|------------|------|------|-----|-------|--------------|-------------------|
| 308.1049 | 308.1063   | -1.4 | -4.5 | 9.5 | 14.7  | 0.0          | C17 H16 N O2 Na F |

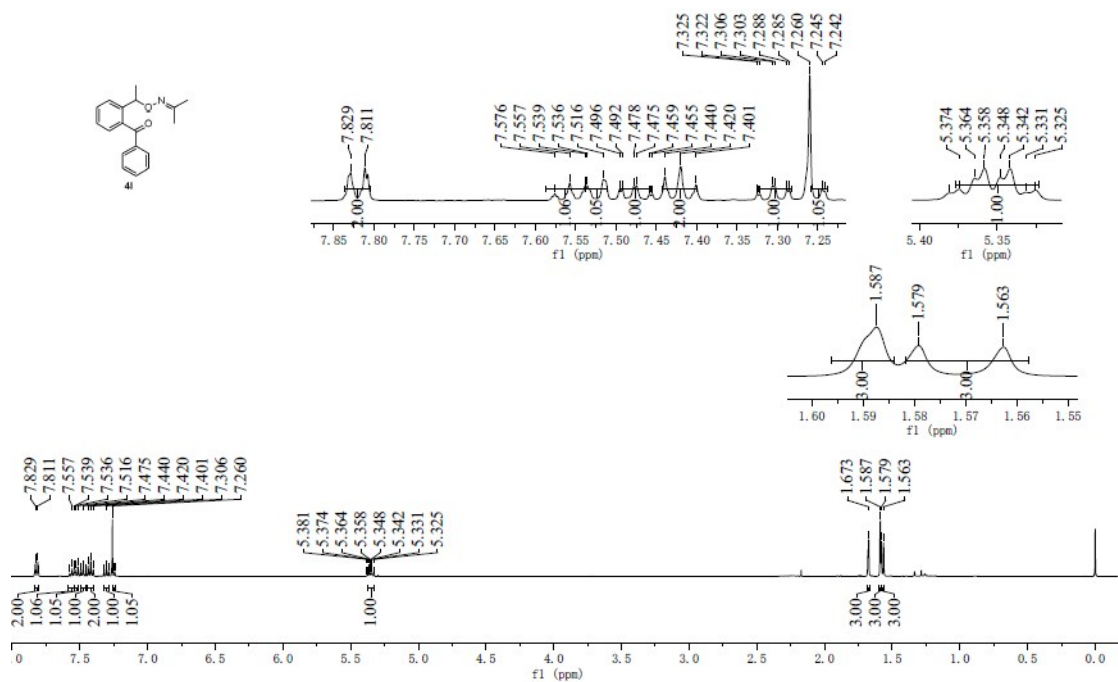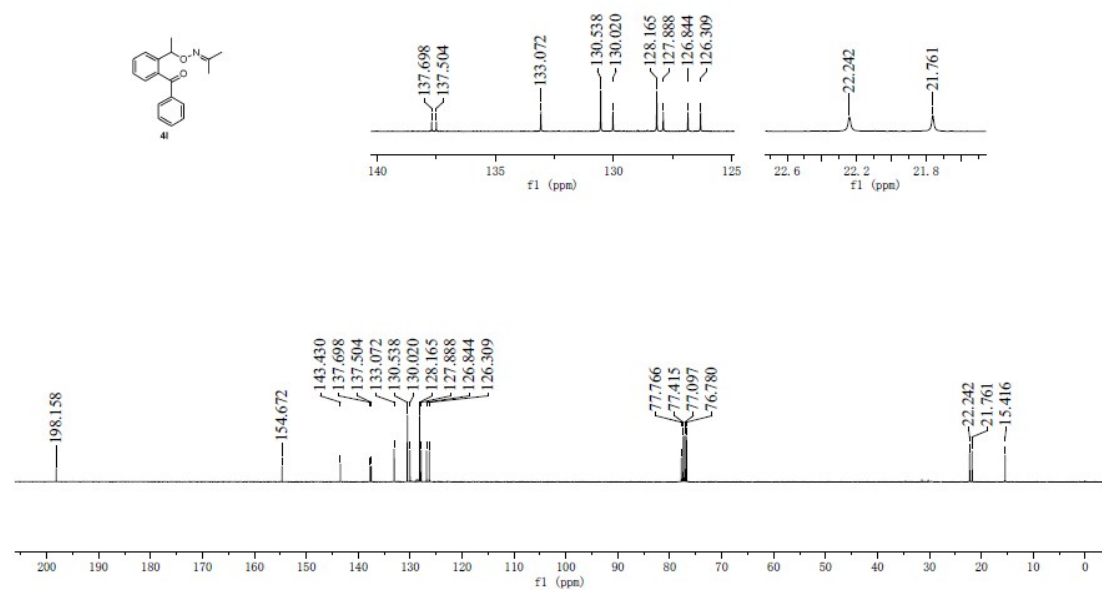

### Single Mass Analysis

Tolerance = 50.0 PPM / DBE: min = -1.5, max = 100.0

Element prediction: Off

Number of isotope peaks used for i-FIT = 3

Monoisotopic Mass, Even Electron Ions

52 formula(e) evaluated with 2 results within limits (up to 1 best isotopic matches for each mass)

Elements Used:

C: 0-19 H: 0-40 N: 0-1 O: 0-5 Na: 0-1

YF-JI

ECUST institute of Fine Chem

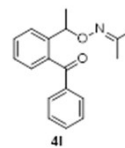

05-Jan-2017

21:43:41

1: TOF MS ES+

7.96e+003

YF-S-520 46 (0.665) Cm (45:48)

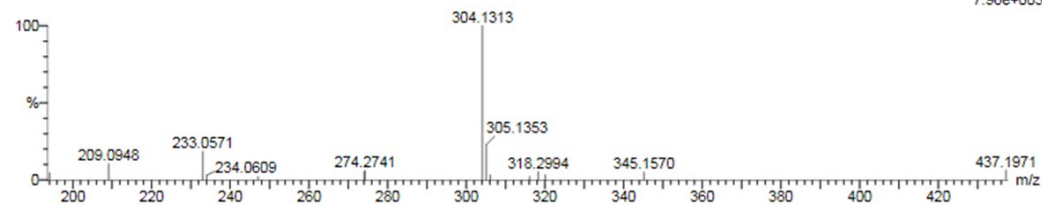

Minimum: -1.5  
Maximum: 30.0 50.0 100.0

| Mass     | Calc. Mass | mDa | PPM | DBE | i-FIT | i-FIT (Norm) | Formula         |
|----------|------------|-----|-----|-----|-------|--------------|-----------------|
| 304.1313 | 304.1313   | 0.0 | 0.0 | 9.5 | 9.7   | 0.0          | C18 H19 N O2 Na |

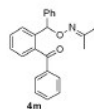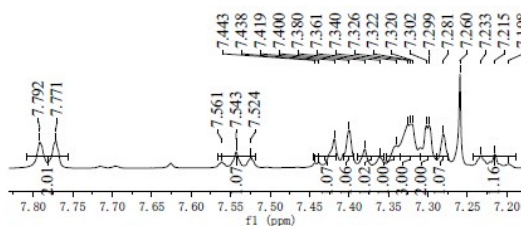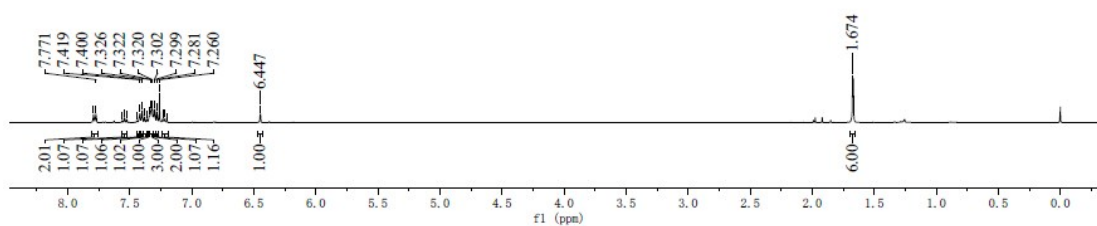

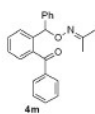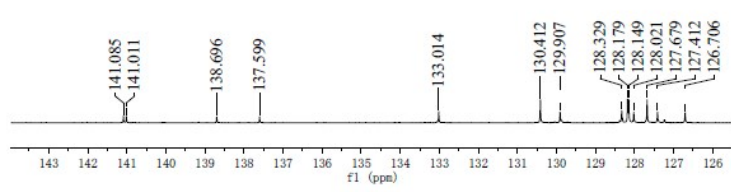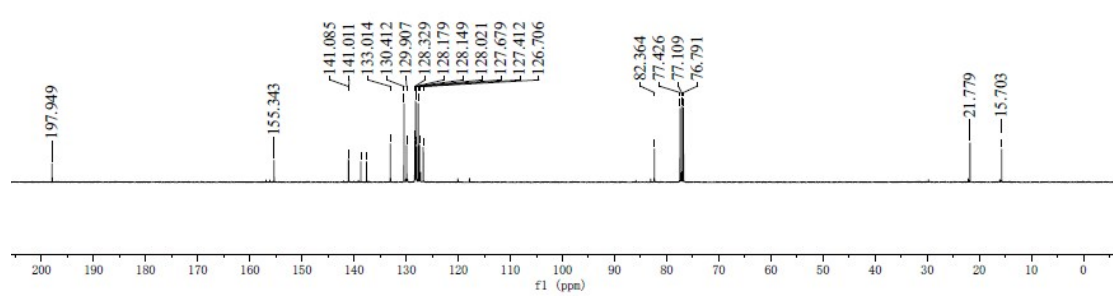

Elemental Composition Report

Multiple Mass Analysis: 25 mass(es) processed  
 Tolerance = 5.0 mDa / DBE: min = -1.5, max = 100.0  
 Element prediction: Off  
 Monoisotopic Mass, Odd and Even Electron Ions  
 286 formula(e) evaluated with 24 results within limits (up to 50 closest results for each mass)  
 Elements Used:  
 C: 0-23 H: 0-21 N: 0-1 O: 0-2

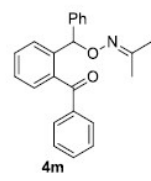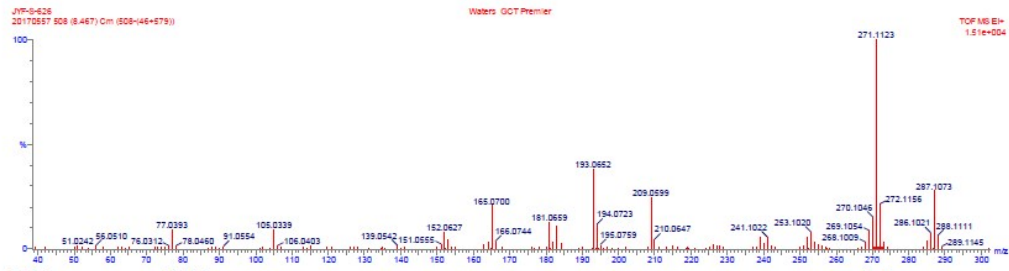

|          |        |            |     |      |      |       |          |       |
|----------|--------|------------|-----|------|------|-------|----------|-------|
| Minimum: | 3.00   |            |     |      |      |       |          |       |
| Maximum: | 100.00 |            | 5.0 | 10.0 |      |       |          | 100.0 |
| Mass     | RA     | Calc. Mass | mDa | PPM  | DBE  | i-FIT | Formula  |       |
| 287.1073 | 27.27  | 287.1072   | 0.1 | 0.3  | 13.5 | 2.6   | C20H15O2 |       |

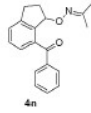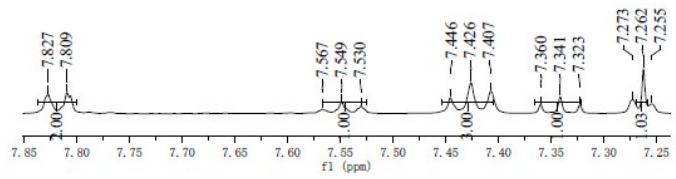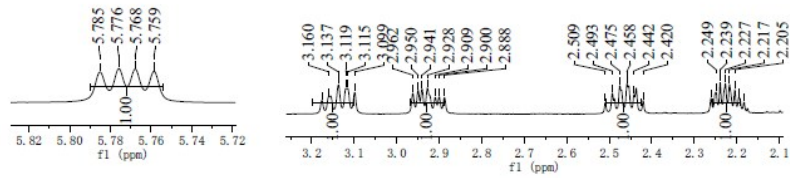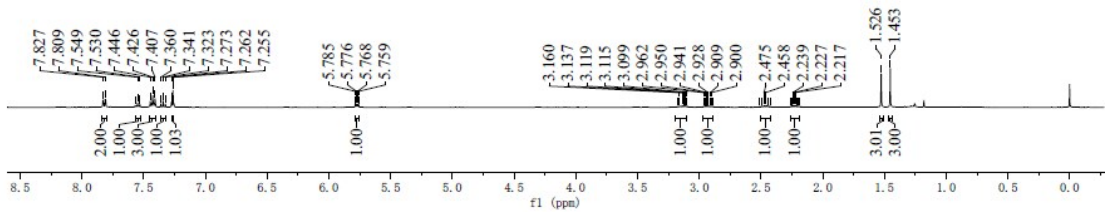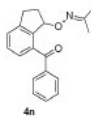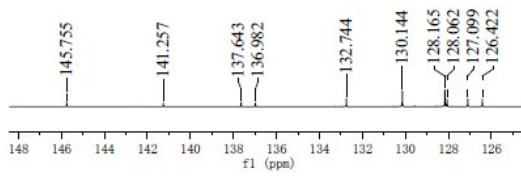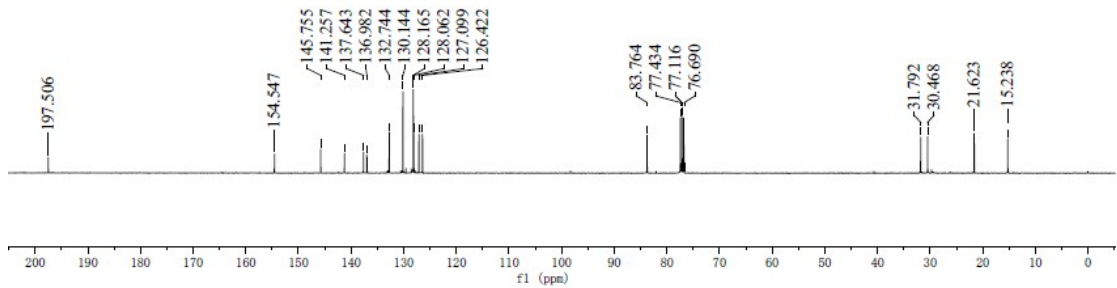

**Single Mass Analysis**

Tolerance = 50.0 PPM / DBE: min = -1.5, max = 100.0

Element prediction: Off

Number of isotope peaks used for i-FIT = 3

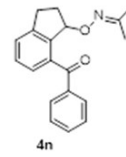

Monoisotopic Mass, Even Electron Ions

45 formula(e) evaluated with 3 results within limits (up to 1 best isotopic matches for each mass)

Elements Used:

C: 0-19 H: 0-40 N: 0-1 O: 0-5 Na: 0-1

YF-JI

ECUST institute of Fine Chem

05-Jan-2017

21:40:05

1: TOF MS ES+

1.79e+004

YF-S-519 25 (0.400) Cm (19:27)

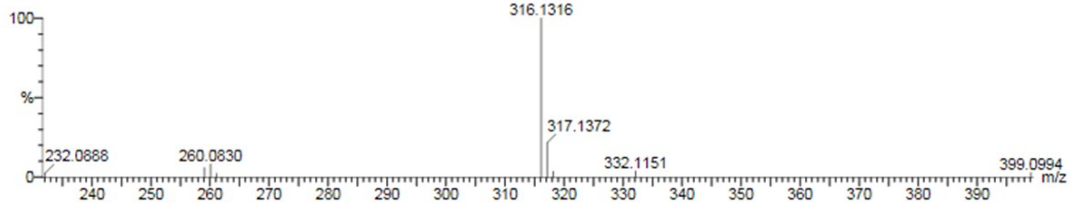

Minimum: -1.5  
Maximum: 100.0

| Mass     | Calc. Mass | mDa | PPM | DBE  | i-FIT | i-FIT (Norm) | Formula         |
|----------|------------|-----|-----|------|-------|--------------|-----------------|
| 316.1316 | 316.1313   | 0.3 | 0.9 | 10.5 | 15.5  | 0.0          | C19 H19 N O2 Na |

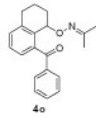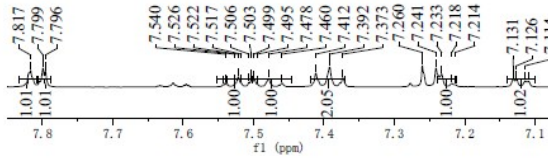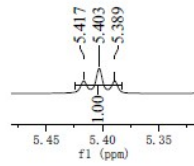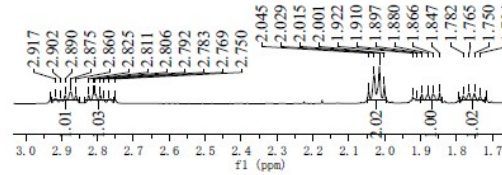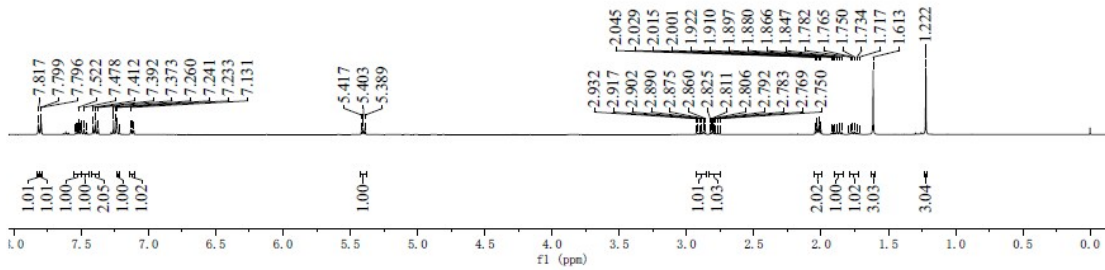



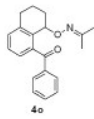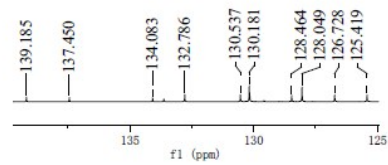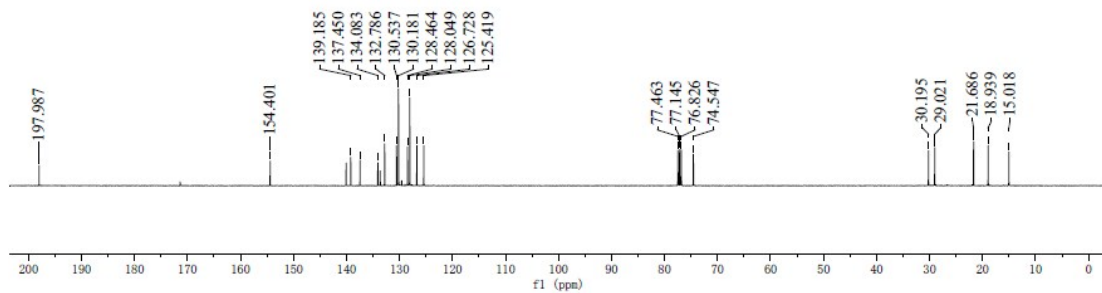

Elemental Composition Report

Multiple Mass Analysis: 17 mass(es) processed

Tolerance = 5.0 mDa / DBE: min = -1.5, max = 100.0

Element prediction: Off

Monoisotopic Mass, Odd and Even Electron Ions

195 formula(e) evaluated with 17 results within limits (up to 50 closest results for each mass)

Elements Used:

C: 0-20 H: 0-21 N: 0-1 O: 0-2

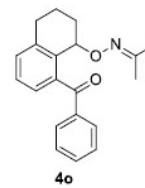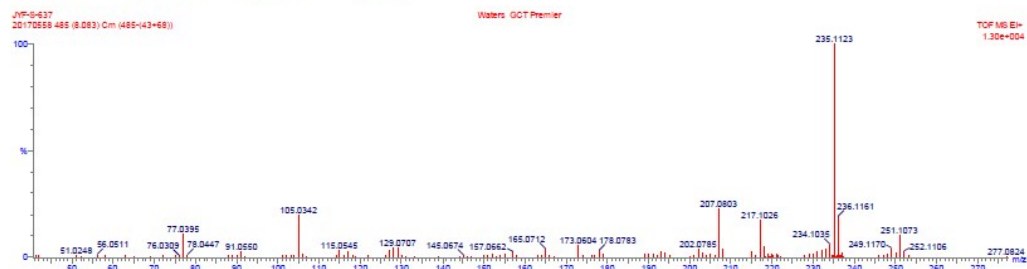

| Mass     | RA   | Calc. Mass | mDa | PPM | DBE  | i-FIT | Formula    |
|----------|------|------------|-----|-----|------|-------|------------|
| 251.1073 | 9.88 | 251.1072   | 0.1 | 0.4 | 10.5 | 4.1   | C17 H15 O2 |

### 4.3 Copies of the spectra for Tables 4

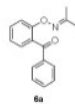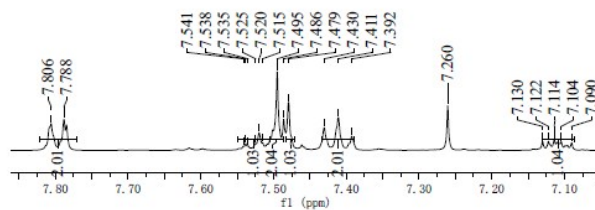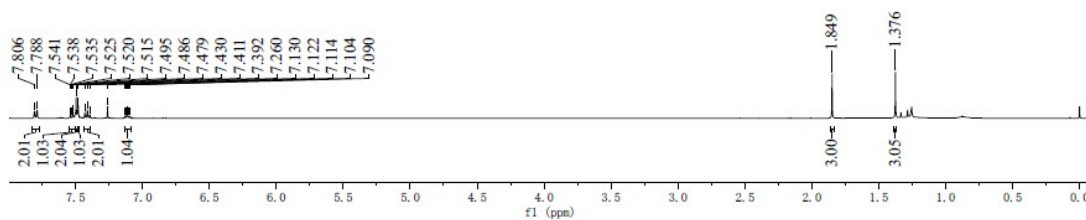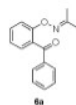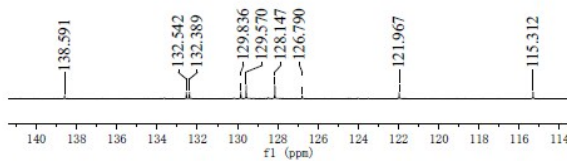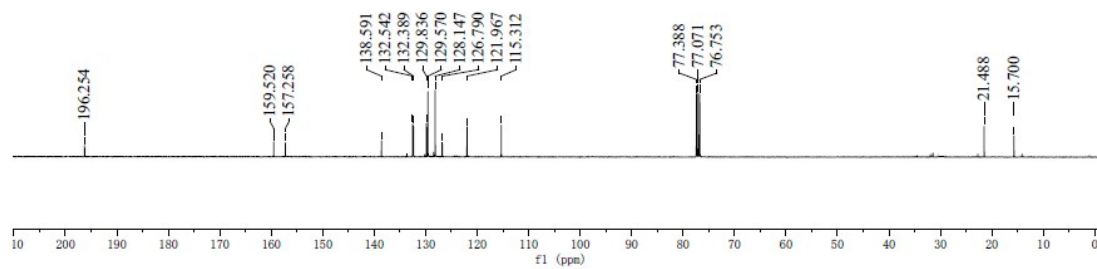



Elemental Composition Report

Multiple Mass Analysis: 24 mass(es) processed

Tolerance = 5.0 mDa / DBE: min = -1.5, max = 100.0

Element prediction: Off

Monoisotopic Mass, Odd and Even Electron Ions

195 formula(e) evaluated with 19 results within limits (up to 50 closest results for each mass)

Elements Used:

C: 0-16 H: 0-15 N: 0-1 O: 0-2

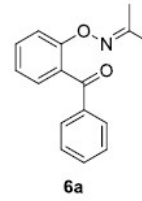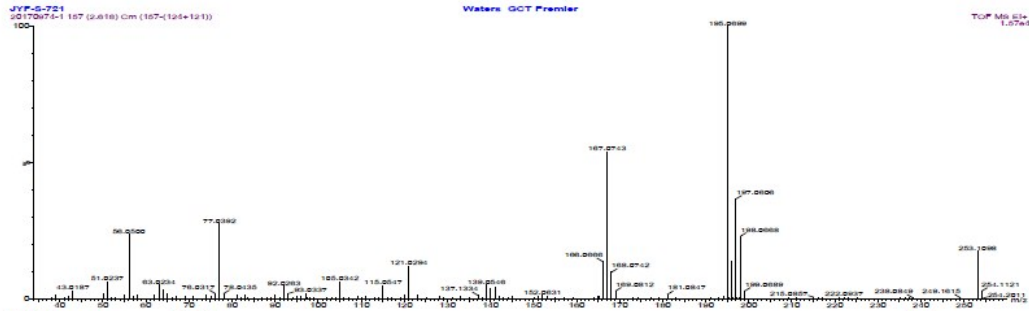

| Mass     | RA    | Calc. Mass | mDa  | PPM  | DBE  | i-FIT | Formula   |
|----------|-------|------------|------|------|------|-------|-----------|
| 253.1098 | 17.66 | 253.1103   | -0.5 | -2.0 | 10.0 | 4.4   | C16H15NO2 |

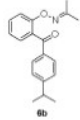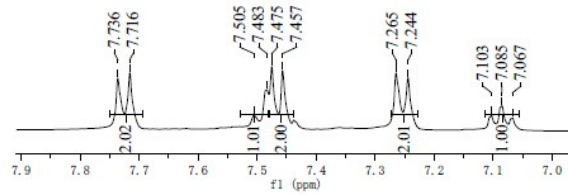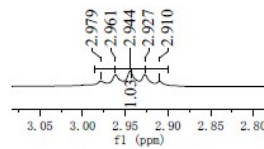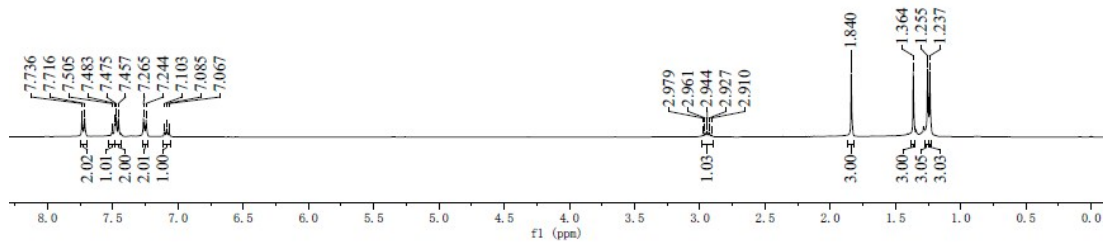

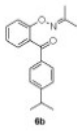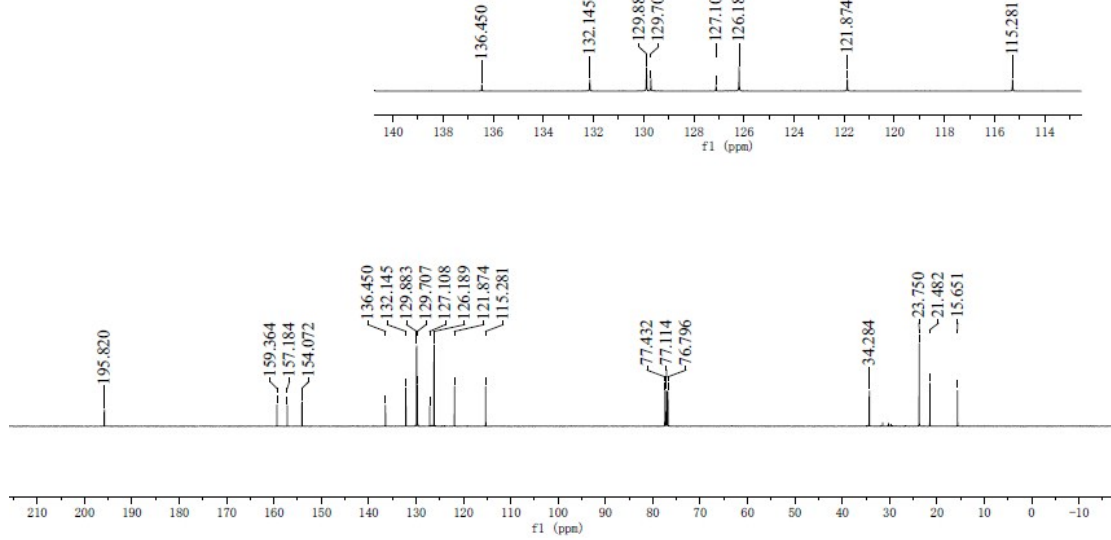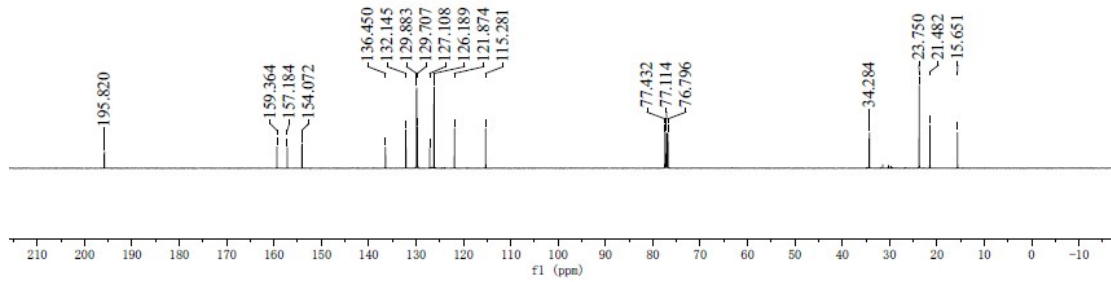

### Elemental Composition Report

Multiple Mass Analysis: 45 mass(es) processed

Tolerance = 5.0 mDa / DBE: min = -1.5, max = 100.0

Element prediction: Off

Monoisotopic Mass, Odd and Even Electron Ions

478 formula(e) evaluated with 42 results within limits (up to 50 closest results for each mass)

Elements Used:

C: 0-19 H: 0-21 N: 0-1 O: 0-2

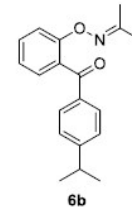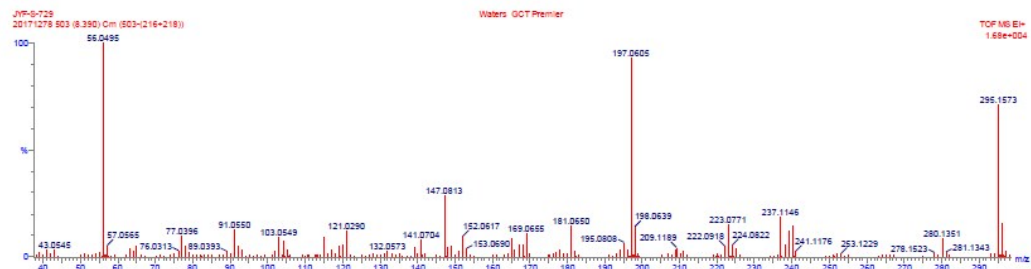

| Minimum: | 3.00   |            |     |     |      |       | -1.5      |
|----------|--------|------------|-----|-----|------|-------|-----------|
| Maximum: | 100.00 |            |     | 5.0 | 10.0 |       | 100.0     |
| Mass     | RA     | Calc. Mass | mDa | PPM | DBE  | i-FIT | Formula   |
| 295.1573 | 70.72  | 295.1572   | 0.1 | 0.3 | 10.0 | 2.6   | C19H21NO2 |

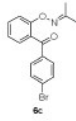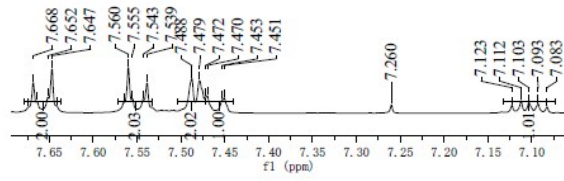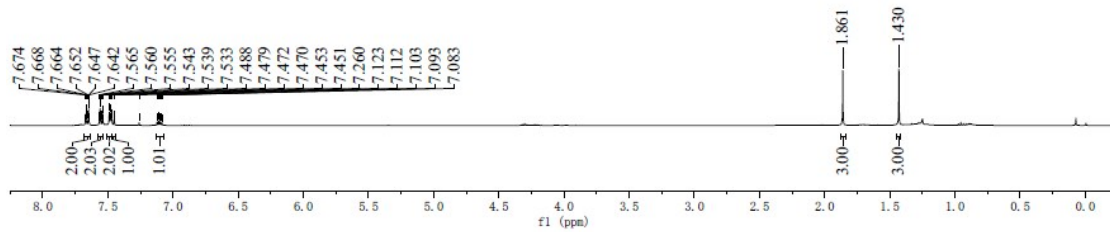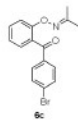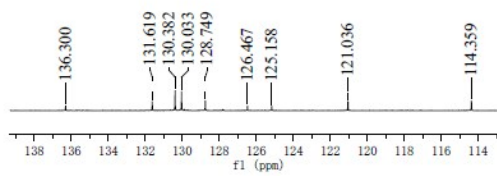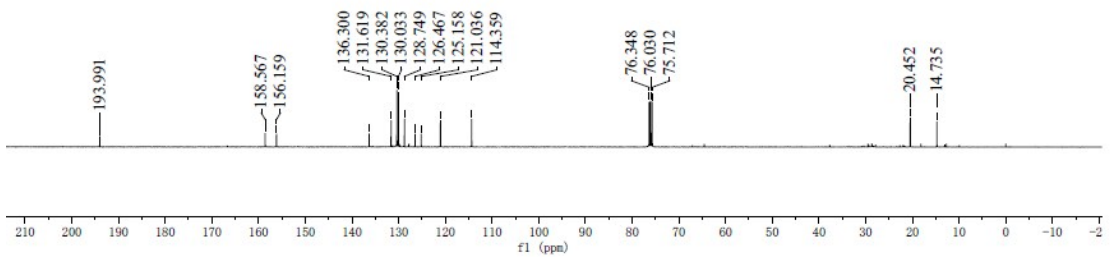

Elemental Composition Report

Multiple Mass Analysis: 44 mass(es) processed

Tolerance = 5.0 mDa / DBE: min = -1.5, max = 100.0

Element prediction: Off

Monoisotopic Mass, Odd and Even Electron Ions

878 formula(e) evaluated with 49 results within limits (up to 50 closest results for each mass)

Elements Used:

C: 0-16 H: 0-14 N: 0-1 O: 0-2 79Br: 0-1 81Br: 0-1

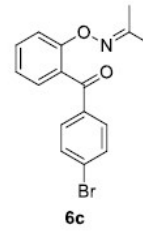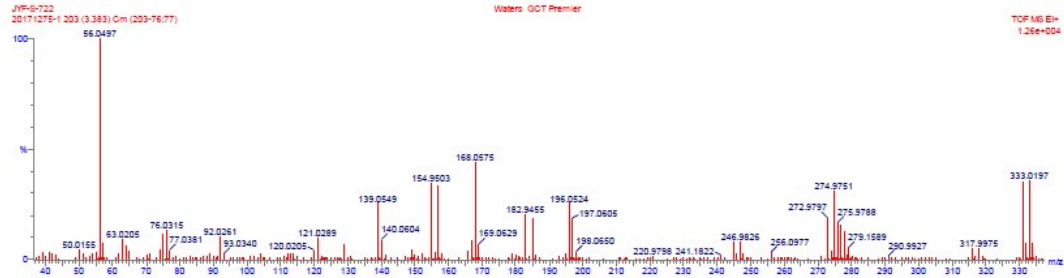

| Minimum: | 3.00   |            |     |     |      |       |                | -1.5  |
|----------|--------|------------|-----|-----|------|-------|----------------|-------|
| Maximum: | 100.00 |            |     | 5.0 |      | 10.0  |                | 100.0 |
| Mass     | RA     | Calc. Mass | mDa | PPM | DBE  | i-FIT | Formula        |       |
| 331.0211 | 34.60  | 331.0208   | 0.3 | 0.9 | 10.0 | 3.2   | C16H14NO2 79Br |       |
| 333.0197 | 35.08  | 333.0187   | 1.0 | 3.0 | 10.0 | 4.8   | C16H14NO2 81Br |       |

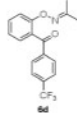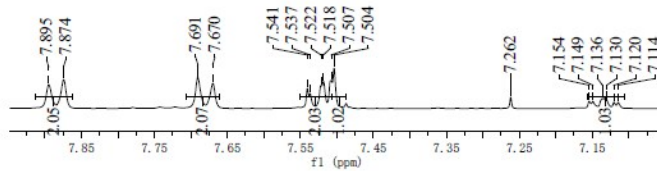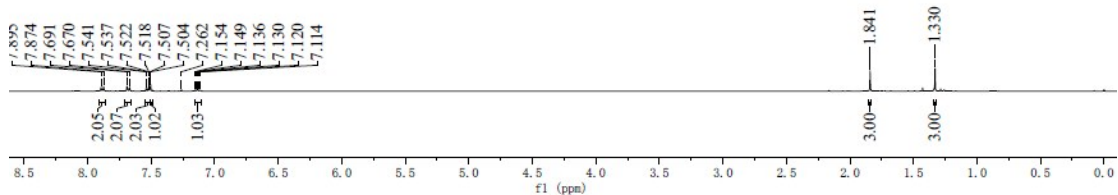

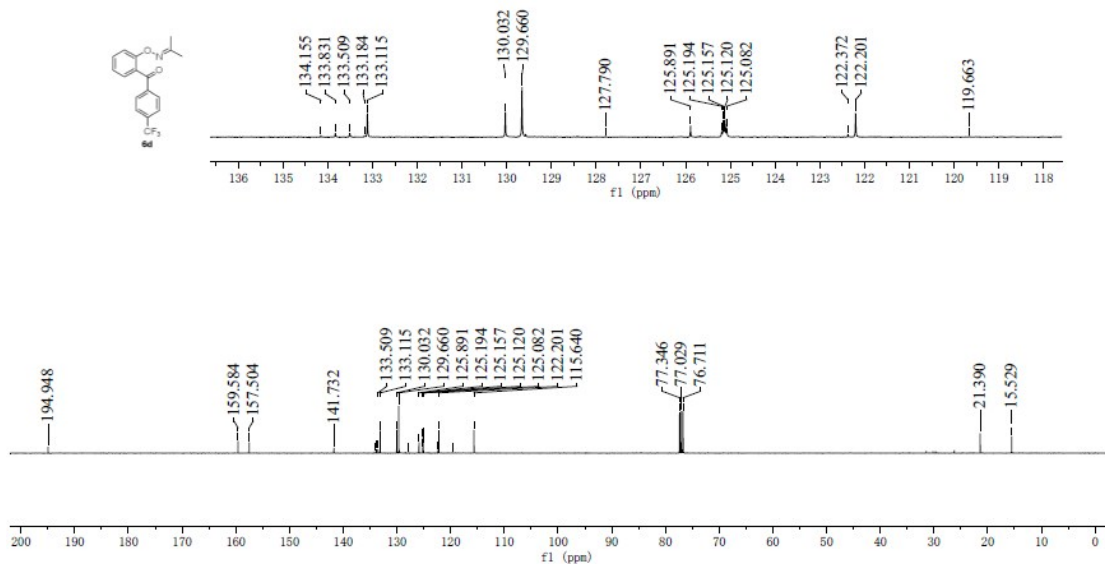

### Elemental Composition Report

Multiple Mass Analysis: 38 mass(es) processed

Tolerance = 5.0 mDa / DBE: min = -1.5, max = 100.0

Element prediction: Off

Monoisotopic Mass, Odd and Even Electron Ions

1011 formula(e) evaluated with 78 results within limits (up to 50 closest results for each mass)

Elements Used:

C: 0-17 H: 0-14 N: 0-1 O: 0-2 F: 0-3

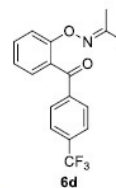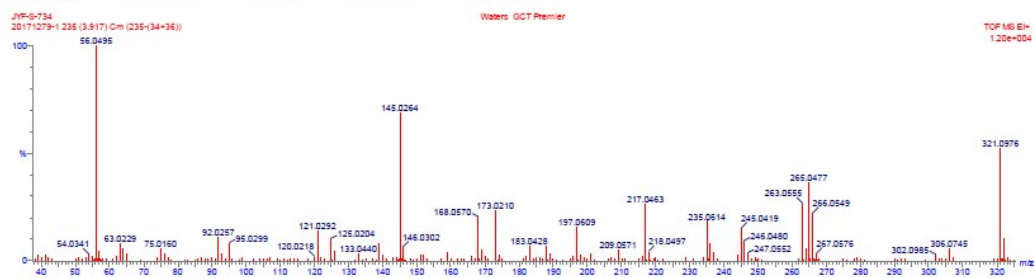

| Mass     | RA    | Calc. Mass | mDa  | PPM  | DBE  | i-FIT | Formula     |
|----------|-------|------------|------|------|------|-------|-------------|
| 321.0976 | 51.58 | 321.0977   | -0.1 | -0.3 | 10.0 | 0.0   | C17H14NO2F3 |

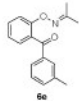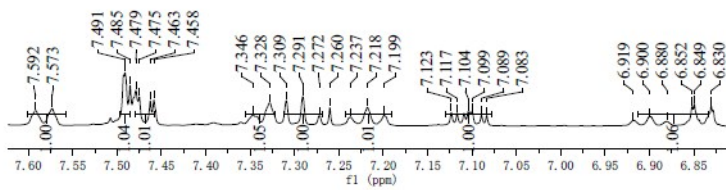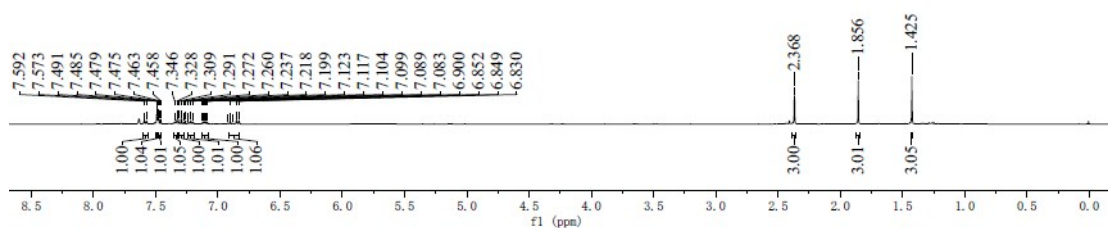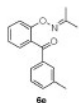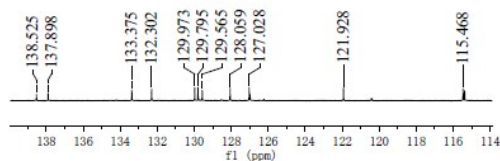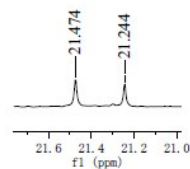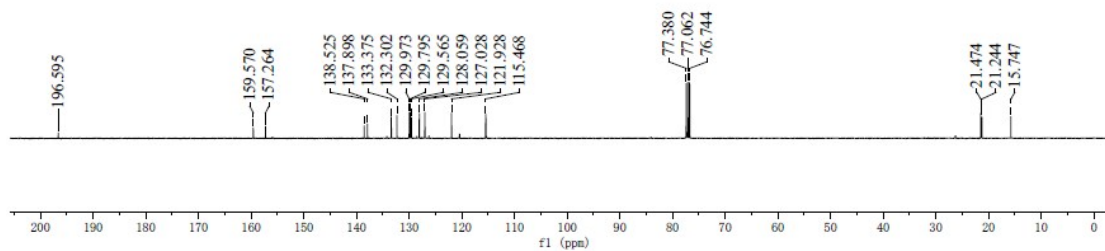



Elemental Composition Report

Multiple Mass Analysis: 29 mass(es) processed

Tolerance = 5.0 mDa / DBE: min = -1.5, max = 100.0

Element prediction: Off

Monoisotopic Mass, Odd and Even Electron Ions

256 formula(e) evaluated with 27 results within limits (up to 50 closest results for each mass)

Elements Used:

C: 0-17 H: 0-17 N: 0-1 O: 0-2

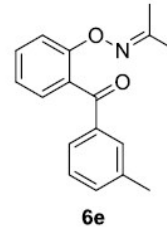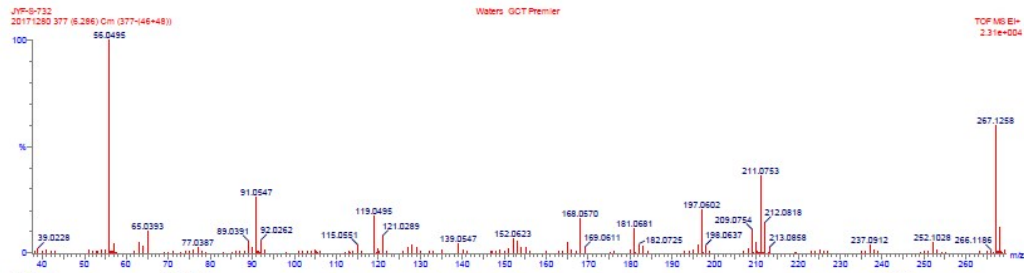

Minimum: 3.00

Maximum: 100.00

5.0

10.0

-1.5

100.0

| Mass     | RA    | Calc. Mass | mDa  | PPM  | DBE  | i-FIT | Formula   |
|----------|-------|------------|------|------|------|-------|-----------|
| 267.1258 | 59.53 | 267.1259   | -0.1 | -0.4 | 10.0 | 0.5   | C17H17NO2 |

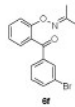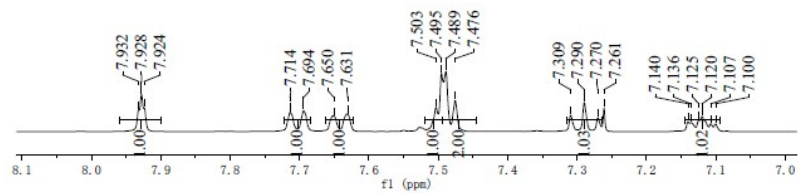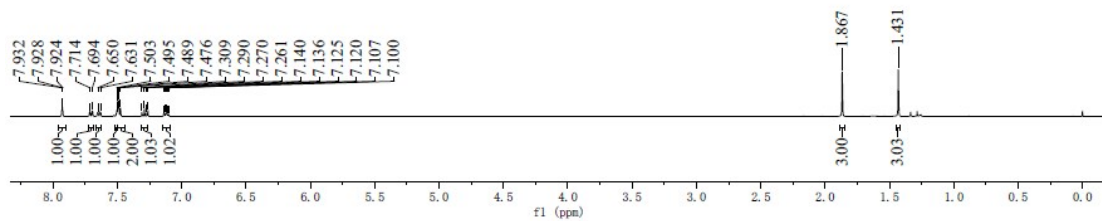

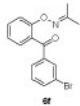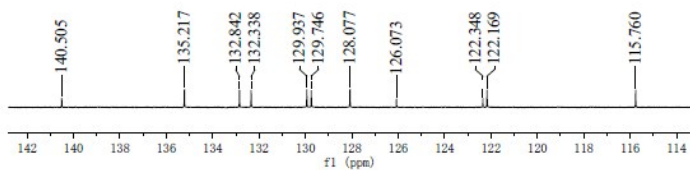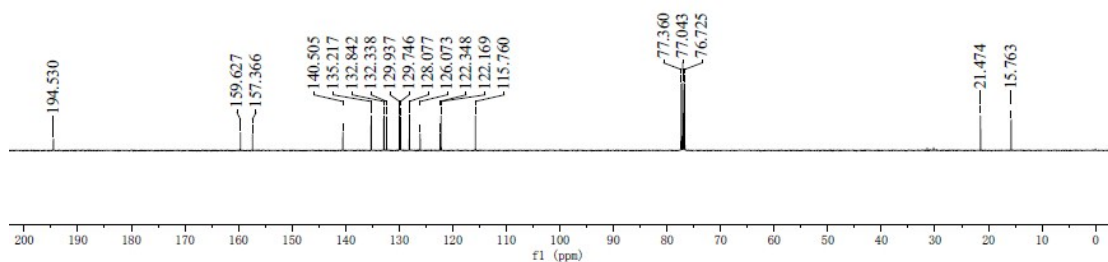

Elemental Composition Report

Multiple Mass Analysis: 26 mass(es) processed

Tolerance = 5.0 mDa / DBE: min = -1.5, max = 100.0

Element prediction: Off

Monoisotopic Mass, Odd and Even Electron Ions

532 formula(e) evaluated with 30 results within limits (up to 50 closest results for each mass)

Elements Used:

C: 0-16 H: 0-14 N: 0-1 O: 0-2 79Br: 0-1 81Br: 0-1

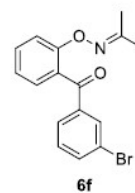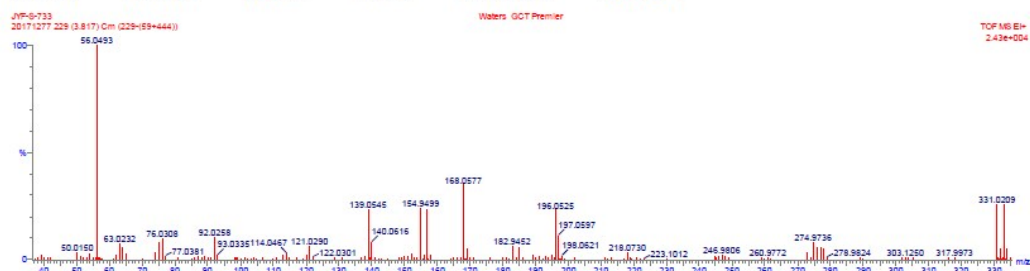

Minimum: 3.00  
Maximum: 100.00

| Mass     | RA    | Calc. Mass | mDa | PPM | DBE  | i-FIT | Formula                                              |
|----------|-------|------------|-----|-----|------|-------|------------------------------------------------------|
| 331.0209 | 25.30 | 331.0208   | 0.1 | 0.3 | 10.0 | 0.1   | C <sub>16</sub> H <sub>14</sub> NO <sub>2</sub> 79Br |
| 333.0195 | 25.27 | 333.0187   | 0.8 | 2.4 | 10.0 | 0.4   | C <sub>16</sub> H <sub>14</sub> NO <sub>2</sub> 81Br |



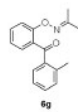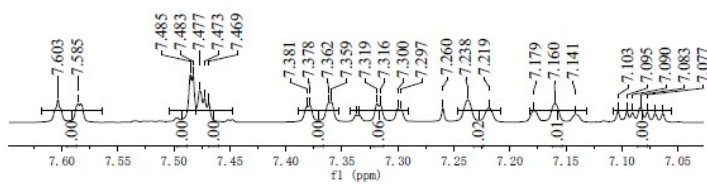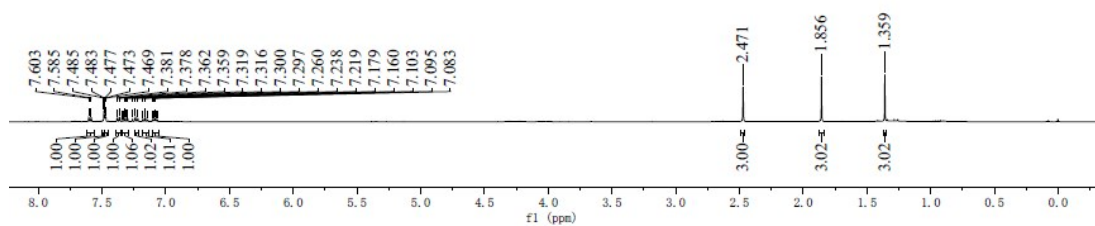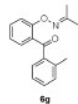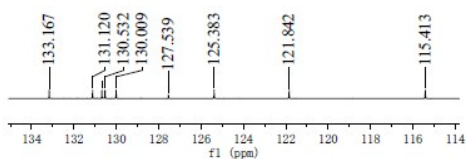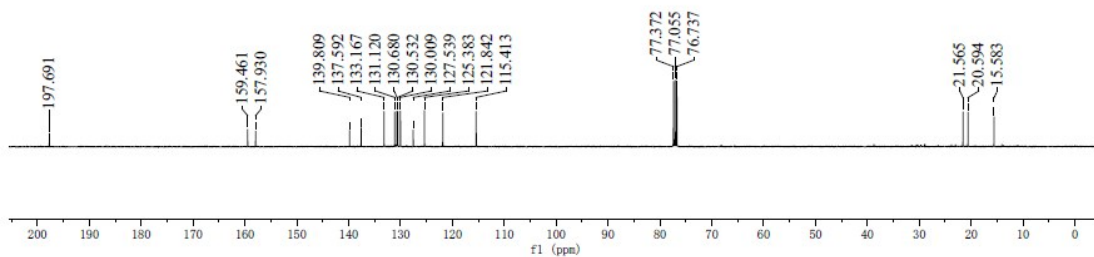

Elemental Composition Report

Multiple Mass Analysis: 32 mass(es) processed

Tolerance = 5.0 mDa / DBE: min = -1.5, max = 100.0

Element prediction: Off

Monoisotopic Mass, Odd and Even Electron Ions

295 formula(e) evaluated with 30 results within limits (up to 50 closest results for each mass)

Elements Used:

C: 0-17 H: 0-17 N: 0-1 O: 0-2

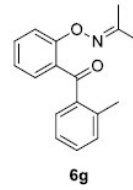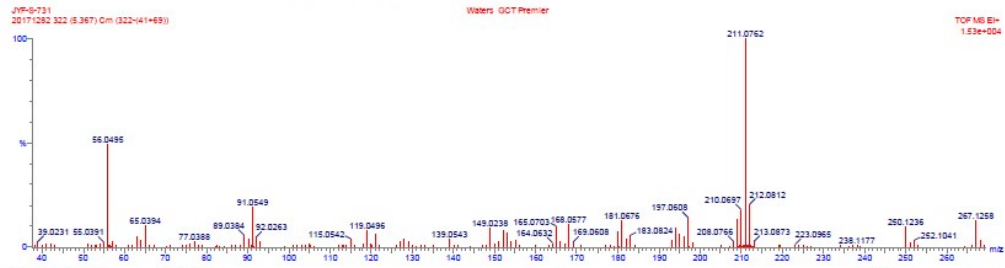

Minimum: 3.00

Maximum: 100.00

5.0

10.0

-1.5

100.0

| Mass     | RA    | Calc. Mass | mDa  | PPM  | DBE  | i-FIT | Formula   |
|----------|-------|------------|------|------|------|-------|-----------|
| 267.1258 | 12.61 | 267.1259   | -0.1 | -0.4 | 10.0 | 1.4   | C17H17NO2 |

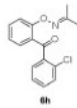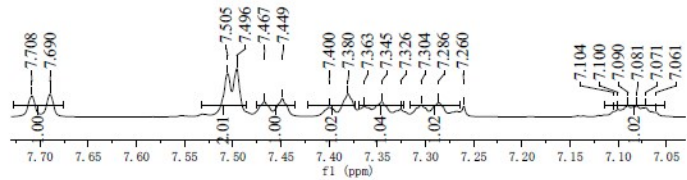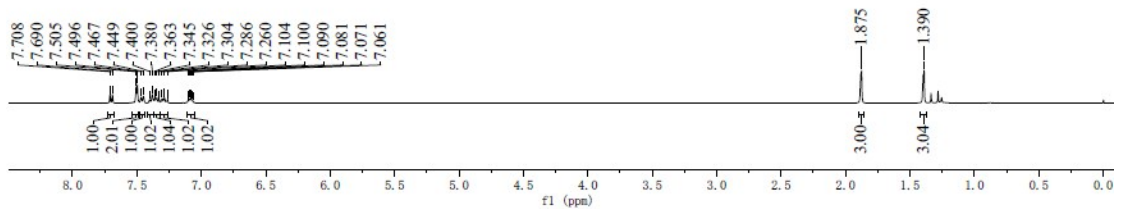

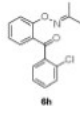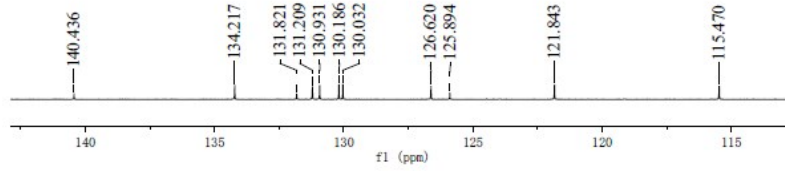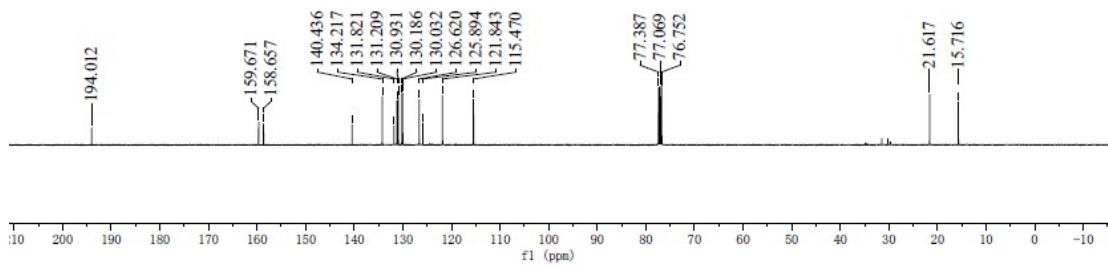

Elemental Composition Report

Multiple Mass Analysis: 32 mass(es) processed

Tolerance = 5.0 mDa / DBE: min = -1.5, max = 100.0

Element prediction: Off

Monoisotopic Mass, Odd and Even Electron Ions

845 formula(e) evaluated with 62 results within limits (up to 50 closest results for each mass)

Elements Used:

C: 0-16 H: 0-14 N: 0-1 O: 0-2 35Cl: 0-1 37Cl: 0-1

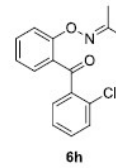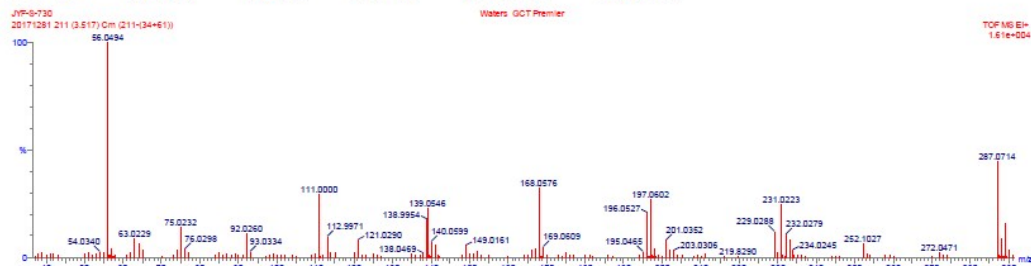

| Mass     | RA    | Calc. Mass | mDa | PPM | DBE  | i-FIT | Formula        |
|----------|-------|------------|-----|-----|------|-------|----------------|
| 287.0714 | 44.63 | 287.0713   | 0.1 | 0.3 | 10.0 | 1.6   | C16H14NO2 35Cl |

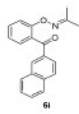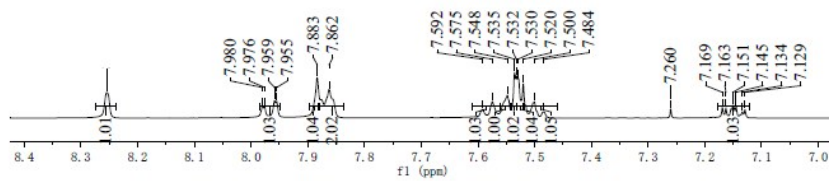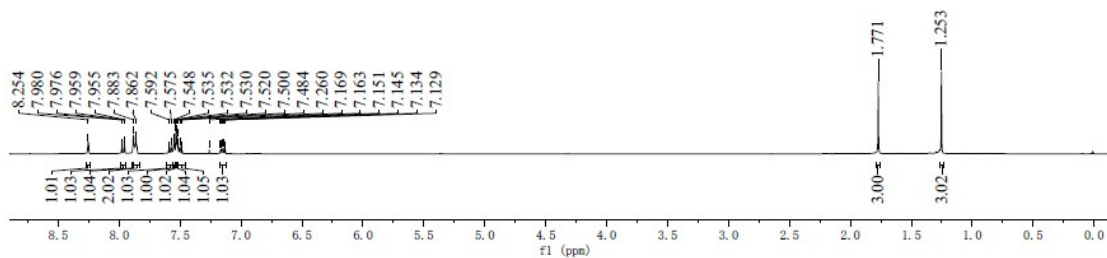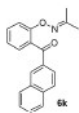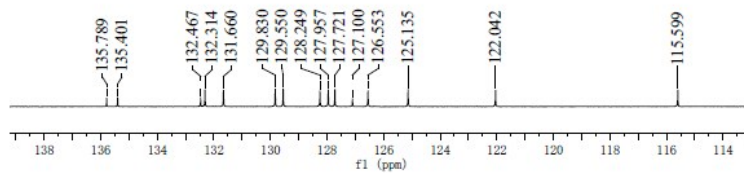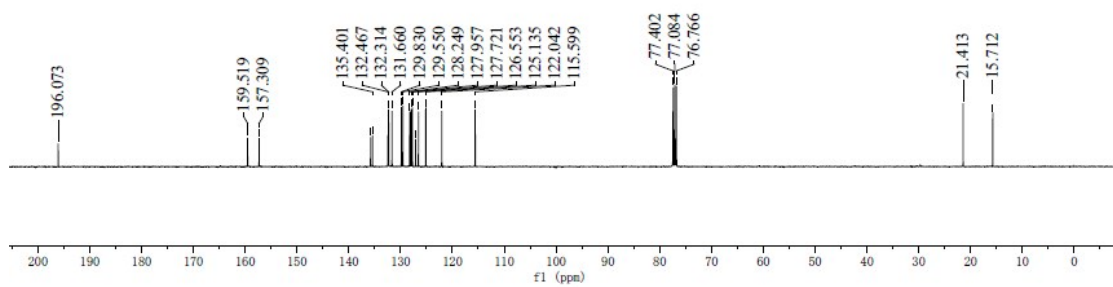

Elemental Composition Report

Multiple Mass Analysis: 28 mass(es) processed

Tolerance = 5.0 mDa / DBE: min = -1.5, max = 100.0

Element prediction: Off

Monoisotopic Mass, Odd and Even Electron Ions

245 formula(e) evaluated with 27 results within limits (up to 50 closest results for each mass)

Elements Used:

C: 0-20 H: 0-17 N: 0-1 O: 0-2

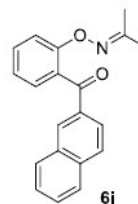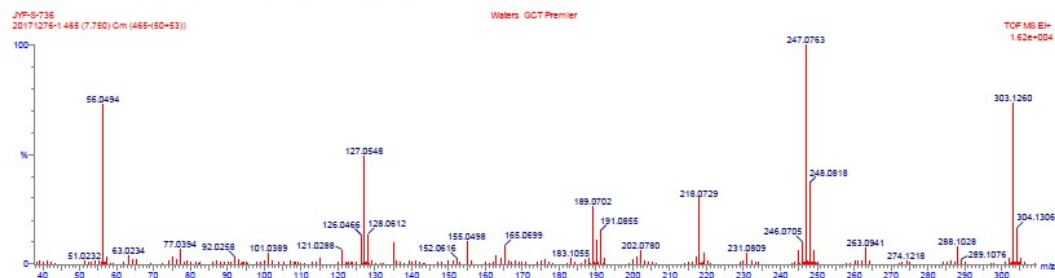

| Mass     | RA    | Calc. Mass | mDa | PPM | DBE  | i-FIT | Formula   |
|----------|-------|------------|-----|-----|------|-------|-----------|
| 303.1260 | 73.34 | 303.1259   | 0.1 | 0.3 | 13.0 | 4.1   | C20H17NO2 |

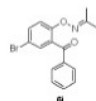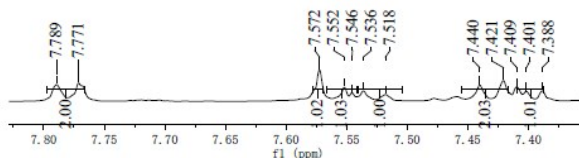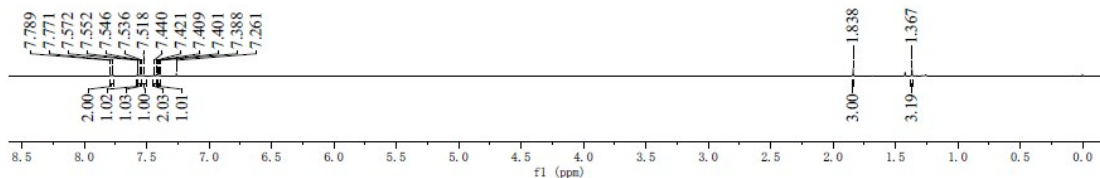

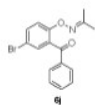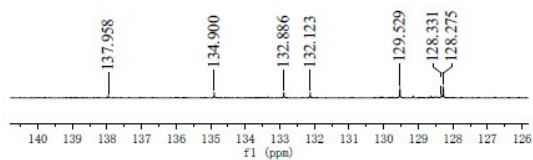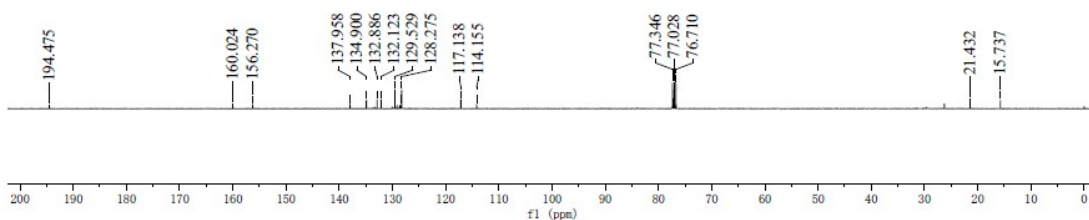

Elemental Composition Report

Multiple Mass Analysis: 29 mass(es) processed

Tolerance = 5.0 mDa / DBE: min = -1.5, max = 100.0

Element prediction: Off

Monoisotopic Mass, Odd and Even Electron Ions

665 formula(e) evaluated with 42 results within limits (up to 50 closest results for each mass)

Elements Used:

C: 0-16 H: 0-14 N: 0-1 O: 0-2 79Br: 0-1 81Br: 0-1

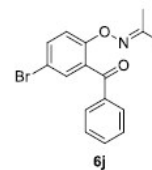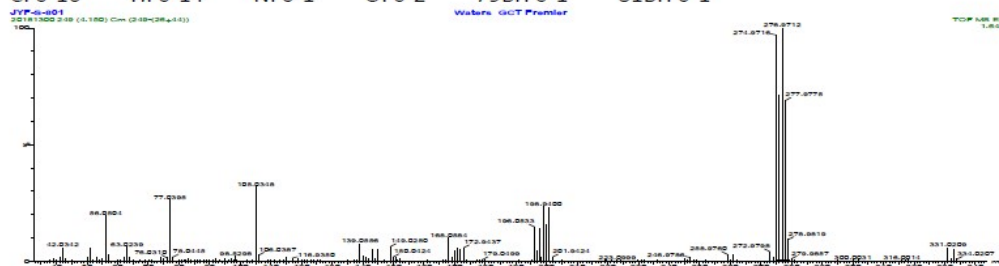

| Mass     | RA   | Calc. Mass | mDa | PPM | DBE  | i-FIT     | Formula        |
|----------|------|------------|-----|-----|------|-----------|----------------|
| 331.0209 | 5.83 | 331.0208   | 0.1 | 0.3 | 10.0 | 2.9       | C16H14NO2 79Br |
| 333.0194 | 5.17 | 333.0187   | 0.7 | 2.1 | 10.0 | 2773107.3 | C16H14NO2 81Br |

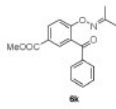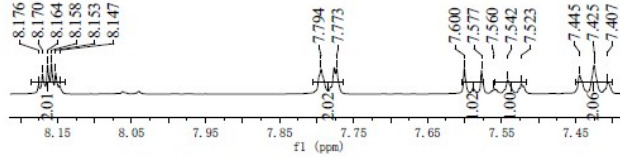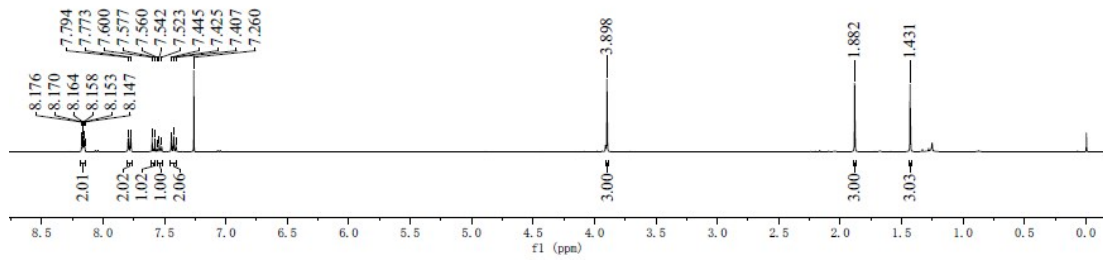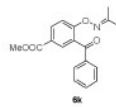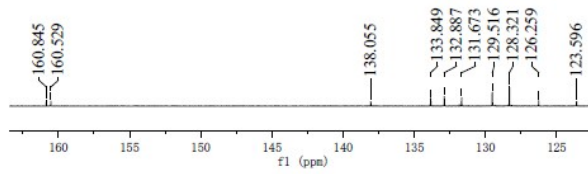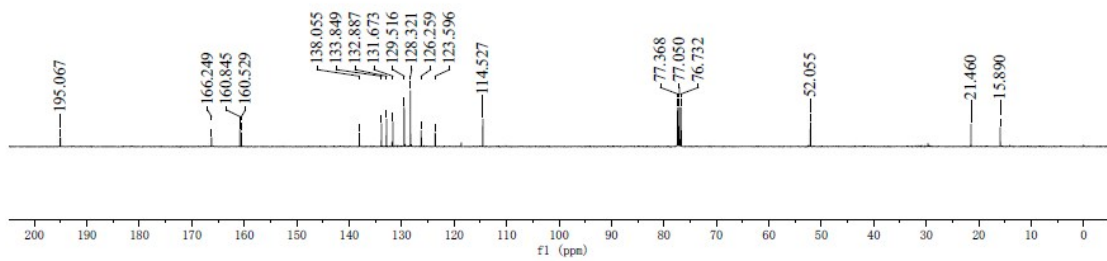



Elemental Composition Report

Multiple Mass Analysis: 25 mass(es) processed

Tolerance = 5.0 mDa / DBE: min = -1.5, max = 100.0

Element prediction: Off

Monoisotopic Mass, Odd and Even Electron Ions

347 formula(e) evaluated with 34 results within limits (up to 50 closest results for each mass)

Elements Used:

C: 0-18 H: 0-17 N: 0-1 O: 0-4

Minimum: 3.00

Maximum: 100.00

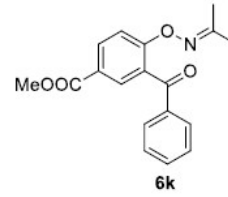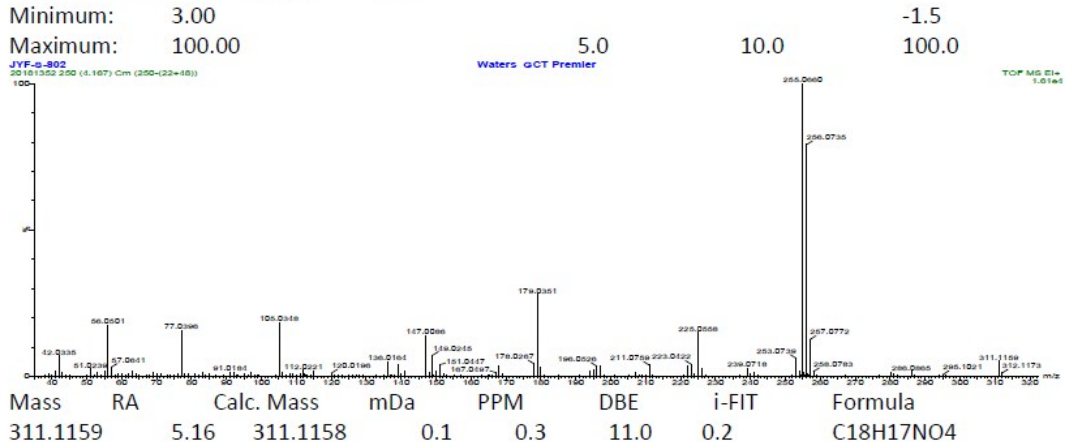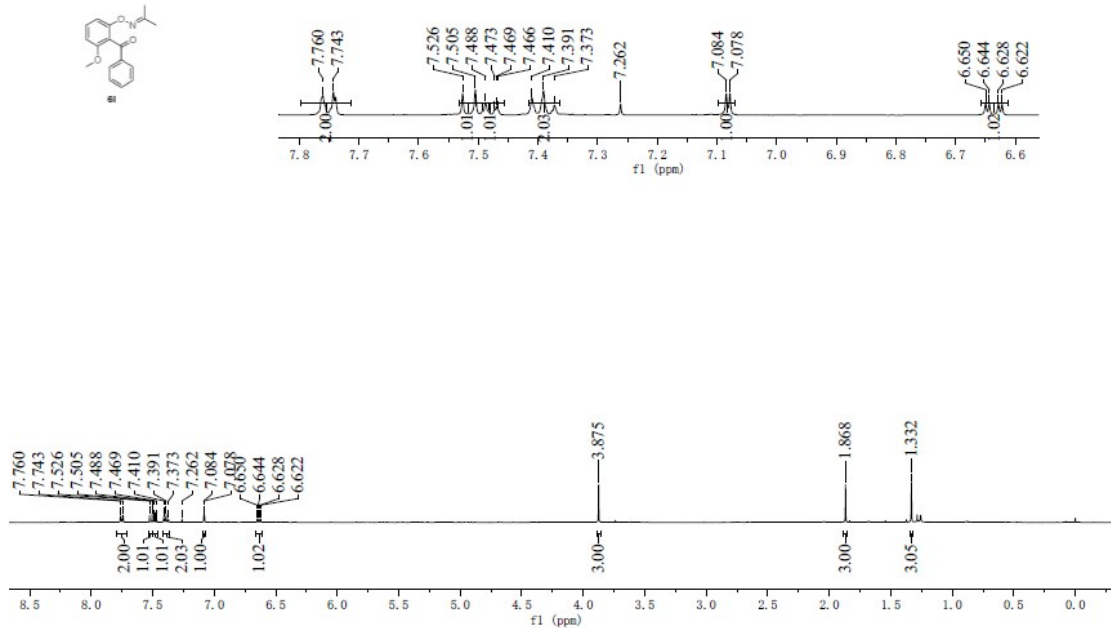



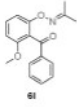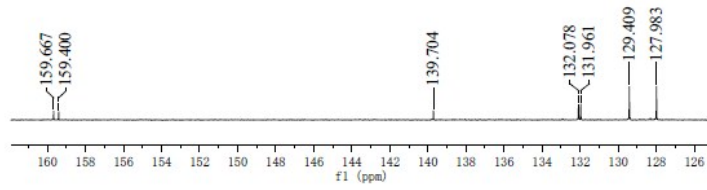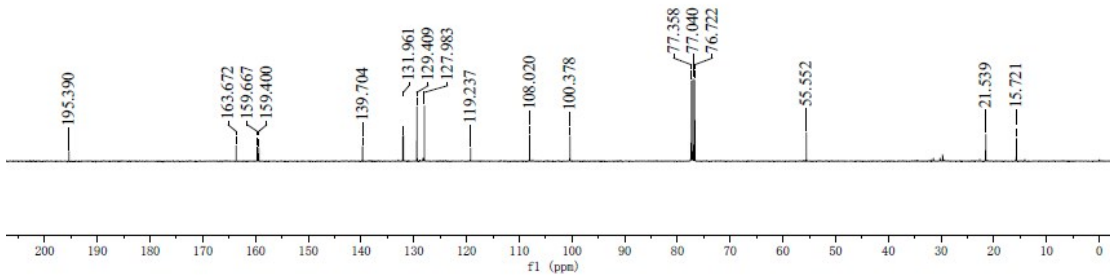

### Elemental Composition Report

Multiple Mass Analysis: 40 mass(es) processed  
 Tolerance = 5.0 mDa / DBE: min = -1.5, max = 100.0  
 Element prediction: Off

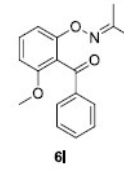

### Monoisotopic Mass, Odd and Even Electron Ions

462 formula(e) evaluated with 41 results within limits (up to 50 closest results for each mass)

Elements Used:

C: 0-17 H: 0-17 N: 0-1 O: 0-3

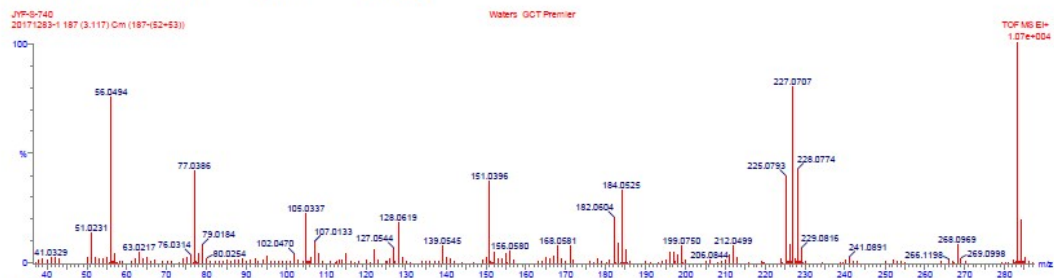

| Mass     | RA     | Calc. Mass | mDa | PPM | DBE  | i-FIT | Formula   |
|----------|--------|------------|-----|-----|------|-------|-----------|
| 283.1209 | 100.00 | 283.1208   | 0.1 | 0.4 | 10.0 | 0.4   | C17H17NO3 |

## 4.4 Copies of the spectra for Scheme 2

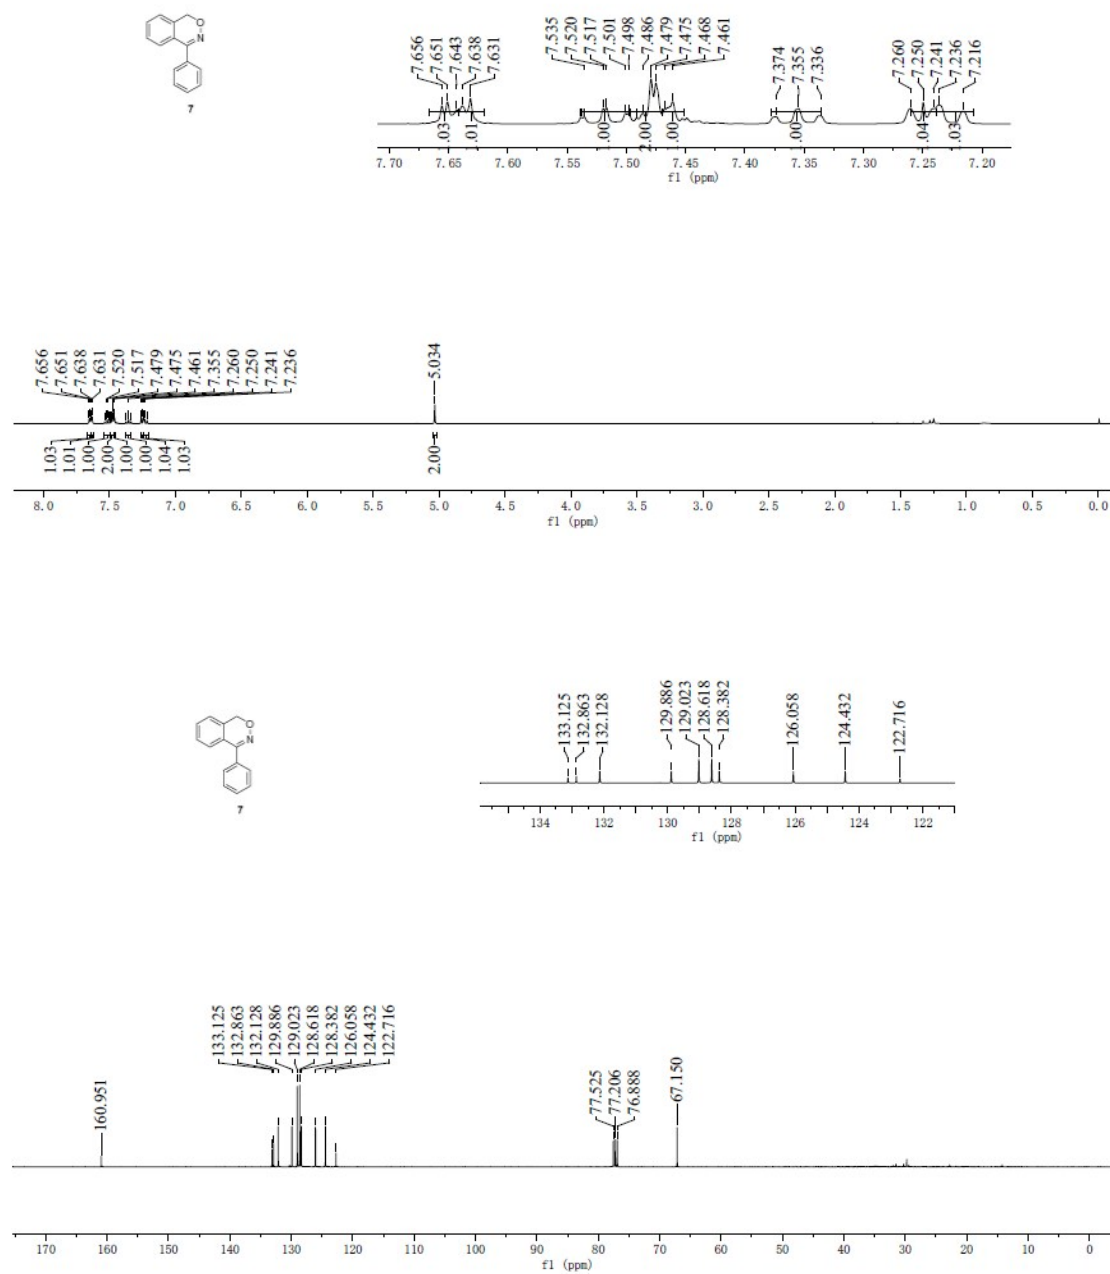

Elemental Composition Report

Multiple Mass Analysis: 46 mass(es) processed

Tolerance = 5.0 mDa / DBE: min = -1.5, max = 100.0

Element prediction: Off

Monoisotopic Mass, Odd and Even Electron Ions

167 formula(e) evaluated with 39 results within limits (up to 50 closest results for each mass)

Elements Used:

C: 0-14 H: 0-11 N: 0-1 O: 0-1

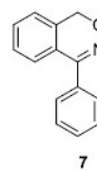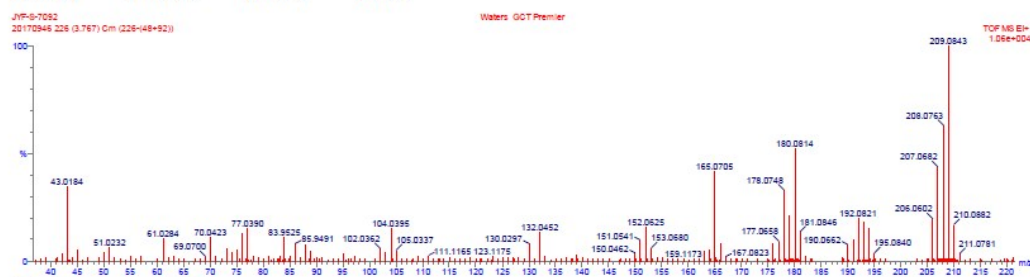

Minimum: 3.00 Maximum: 100.00

Mass RA Calc. Mass mDa PPM DBE i-FIT Formula

209.0843 100.00 209.0841 0.2 1.0 10.0 32.3 C14H11NO

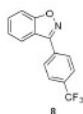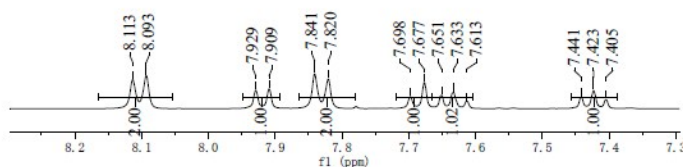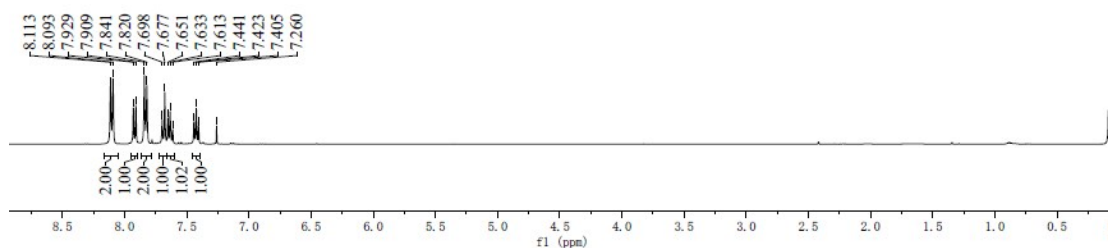



### 4.5 Copies of the spectra for Scheme 3

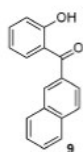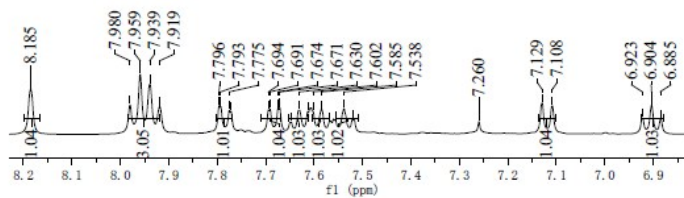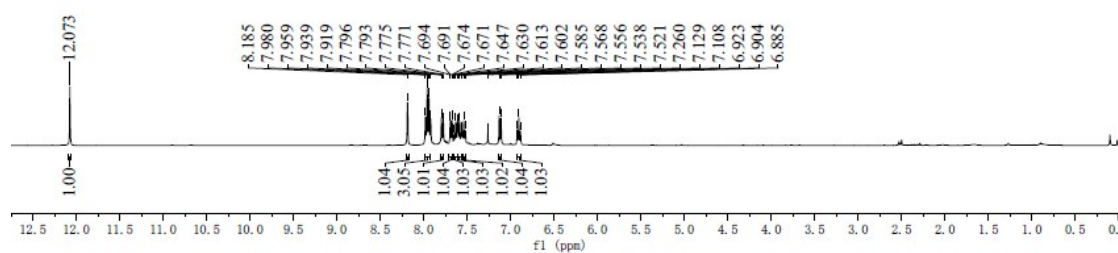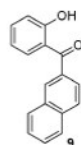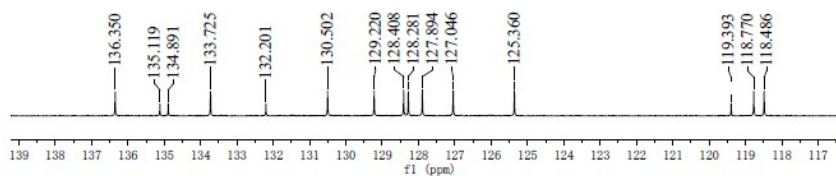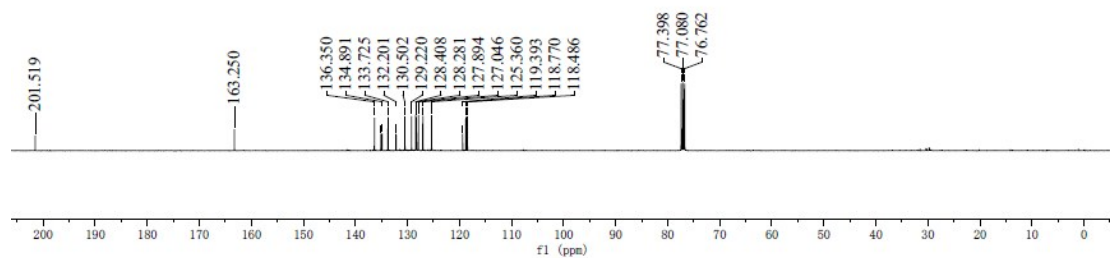

Elemental Composition Report

Multiple Mass Analysis: 2 mass(es) processed

Tolerance = 5.0 PPM / DBE: min = -1.5, max = 50.0

Element prediction: Off

Number of isotope peaks used for i-FIT = 3

Monoisotopic Mass, Even Electron Ions

470 formula(e) evaluated with 2 results within limits (all results (up to 1000) for each mass)

Elements Used:

12C: 0-50 13C: 0-1 H: 0-50 O: 0-6

Y30141072-8211

20161202 289 (2.802) cm (289-1297+1304)

XEVO-G2TOF#NotSet

04-Jun-2018 10:54:52  
1: TOF MS ES+  
1.15e5

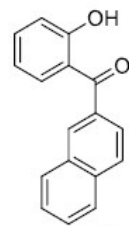

9

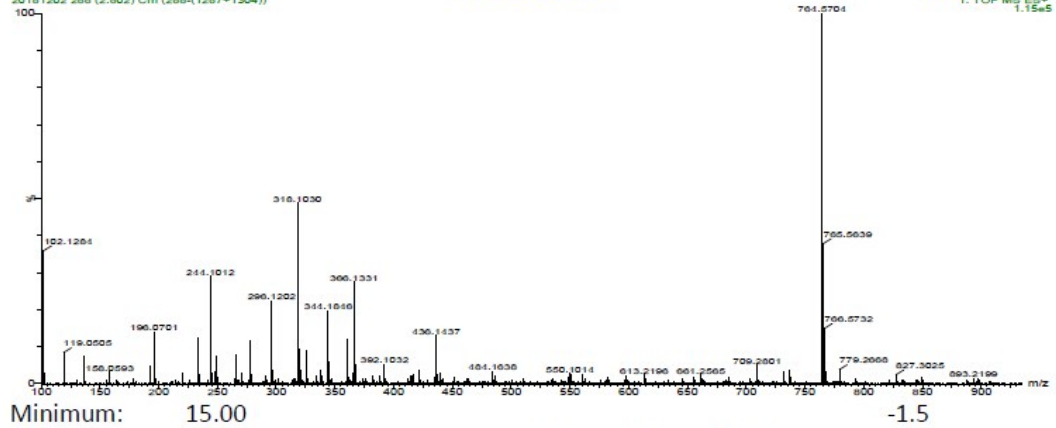

|          |        |            |     |     |      |       |      |         |            |  |  |
|----------|--------|------------|-----|-----|------|-------|------|---------|------------|--|--|
| Minimum: | 15.00  |            |     |     |      |       |      |         |            |  |  |
| Maximum: | 100.00 |            |     | 5.0 | 5.0  | 50.0  |      |         |            |  |  |
| Mass     | RA     | Calc. Mass | mDa | PPM | DBE  | i-FIT | Norm | Conf(%) | Formula    |  |  |
| 249.0918 | 100.00 | 249.0916   | 0.2 | 0.8 | 11.5 | 240.7 | n/a  | n/a     | 12C17H13O2 |  |  |

4.6 Copies of the spectra for Scheme 4

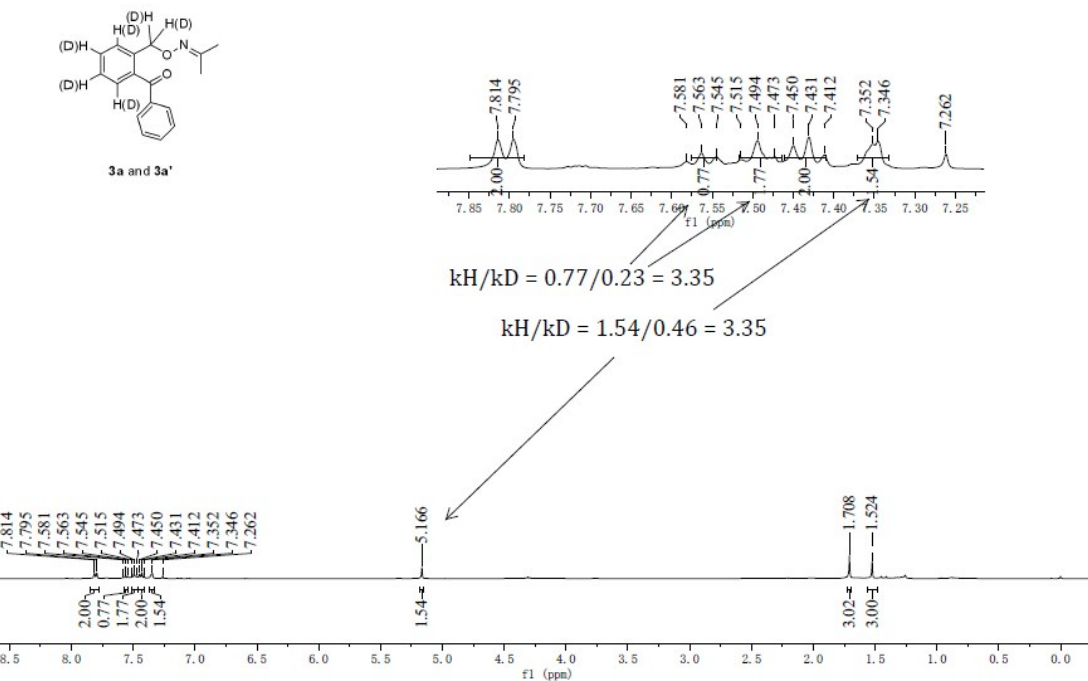



## 4.7 Copies of the spectra for TEMPO ester adduct 10

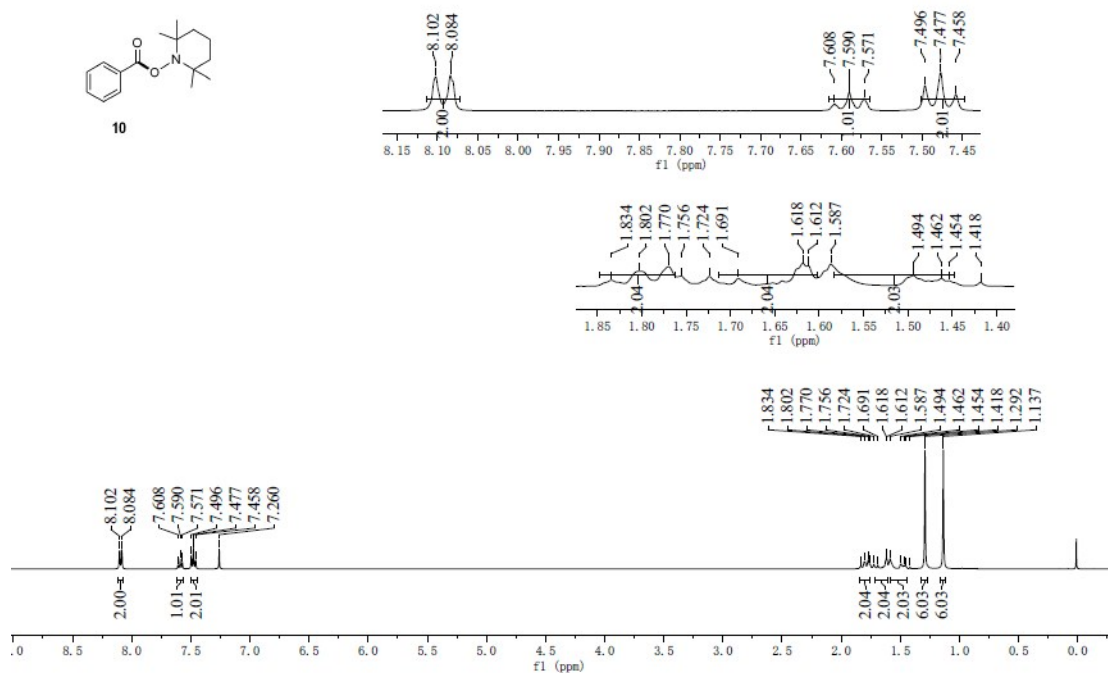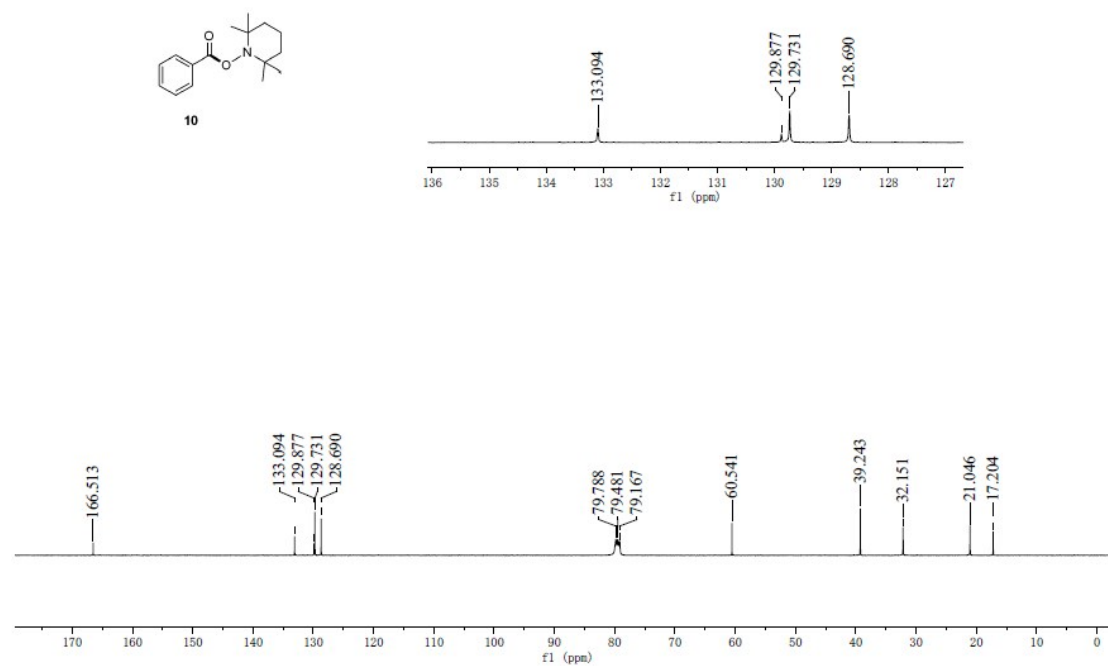



Elemental Composition Report

Multiple Mass Analysis: 24 mass(es) processed

Tolerance = 5.0 mDa / DBE: min = -1.5, max = 100.0

Element prediction: Off

Monoisotopic Mass, Odd and Even Electron Ions

239 formula(e) evaluated with 23 results within limits (up to 50 closest results for each mass)

Elements Used:

C: 0-16 H: 0-23 N: 0-1 O: 0-2

20181360 122 (2.033) Cm (122-(57+80))

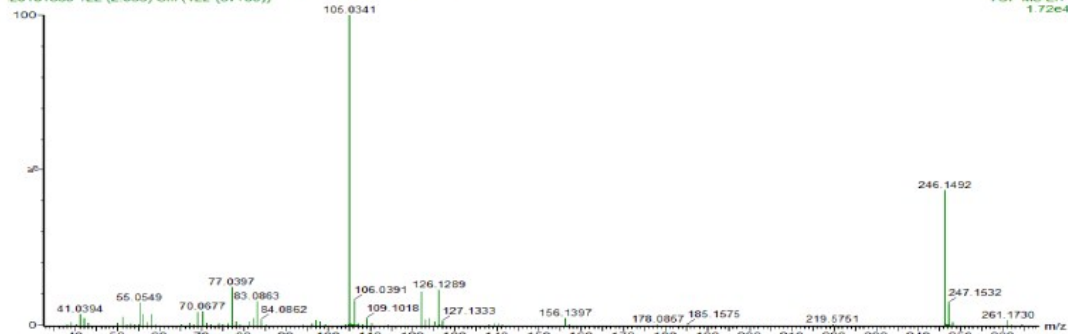

| Mass     | RA   | Calc. Mass | mDa | PPM | DBE | i-FIT     | Formula   |
|----------|------|------------|-----|-----|-----|-----------|-----------|
| 261.1730 | 1.56 | 261.1729   | 0.1 | 0.4 | 6.0 | 2773021.8 | C16H23NO2 |

Minimum: 1.50      Maximum: 100.00      DBE: 5.0, 10.0      i-FIT: -1.5, 100.0

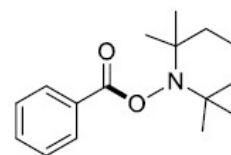

10
